# Supplementary material for: The asymmetric reduction of imidazolinones with trichlorosilane
Source: Royal Society of Chemistry journal article supplement (doi:10.1039/c7cc01561e), 2017-01-01
Supplement: c7cc01561e1.pdf [file c7cc01561e1.pdf]

## Electronic Supplementary Information

### The Asymmetric Reduction of Imidazolinones with Trichlorosilane

Christian Wagner, Andreas F. Kotthaus, Stefan F. Kirsch\*

*Organic Chemistry, Bergische Universität Wuppertal, Gaußstr. 20, D-42119  
Wuppertal, Germany*

#### Electronic Supplementary Information

Experimental procedures, analytical data and copies of  $^1\text{H}$ ,  $^{13}\text{C}$  NMR-spectra and HPLC-traces

#### List of Contents

|                                                                             |    |
|-----------------------------------------------------------------------------|----|
| General experimental details .....                                          | 2  |
| Substrate synthesis .....                                                   | 3  |
| Aromatic substrates .....                                                   | 3  |
| Aliphatic substrates.....                                                   | 14 |
| Catalyst synthesis .....                                                    | 17 |
| Asymmetric organocatalytic reduction .....                                  | 21 |
| Synthesis of amino acid derivates .....                                     | 31 |
| References .....                                                            | 32 |
| Copies of $^1\text{H}$ and $^{13}\text{C}$ NMR-spectra and HPLC-traces..... | 33 |

## General Experimental Details

All commercially available chemicals were used without further purification. Moisture sensitive reactions were performed using standard Schlenk-techniques under an atmosphere of nitrogen. Methylene chloride ( $\text{CH}_2\text{Cl}_2$ ), diethyl ether ( $\text{Et}_2\text{O}$ ) and tetrahydrofuran (THF) were dried using an SPS-800 from M. Braun.  $^1\text{H}$  NMR spectra were obtained on Bruker 600 MHz FT-NMR and 400 MHz FT-NMR spectrometers.  $^{13}\text{C}$  NMR spectra were recorded at 151 MHz and 101 MHz. Chemical shifts are reported in ppm relative to the solvent signal. Multiplicity is indicated as follows: s (singlet); bs (broad singlet); d (doublet); t (triplet); q (quartet); m (multiplet); dd (doublet of doublets), etc. GC-MS analysis (EI) was performed on an Agilent Technologies 7890A with an MSD 5975C detector; high resolution mass spectra were obtained on a Bruker Daltonics micrOTOF (ESI). IR spectra were recorded on a Bruker ALPHA spectrometer using ATR technique. Flash chromatography was performed with E. Merck silica gel (43–60  $\mu\text{m}$ ). The employed eluent is reported in parentheses (PE = petroleum ether, CH = cyclohexane). Thin-layer chromatography (TLC) was performed on precoated glass-backed plates (Merck Kieselgel 60 F<sub>254</sub>), and components were visualized by observation under UV light or by treating the plates with  $\text{KMnO}_4$  or CAM (cerium ammonium molybdate in diluted sulfuric acid) or Ninhydrin (in ethanol with acetic acid) solution followed by heating. Enantiomeric purities were determined using chiral HPLC (Chiralpak-column with solvent mixtures consisting of heptane and isopropanol or ethanol) or achiral HPLC (Kromasil RP 18-column with solvent mixtures consisting of acetonitrile and TFA (0.1%, aq.)) after derivatization with a chiral reagent. Optical rotations were obtained on a Perkin-Elmer Polarimeter 241.

## Substrate synthesis

### Aromatic substrates (1a-i)

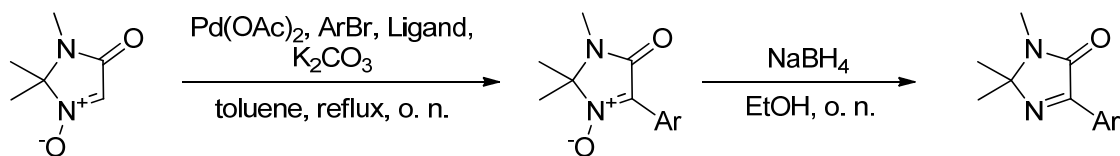

### General procedure for the palladium-catalyzed direct arylation of nitrones

The direct arylations were conducted according to an optimised procedure of Zhao and Wang *et al.*<sup>1</sup> The nitrone, potassium carbonate (2.0 eq.), P(*o*-Tol)<sub>3</sub> (0.15 eq., PPh<sub>3</sub> if Bromobenzene was used) and the corresponding aryl bromide were dissolved in toluene (0.1 M solution), and palladium acetate (0.05 eq.) was added. The reaction mixture was heated under reflux to satisfying conversion (controlled by TLC), i.e. over night in most cases. The mixture was filtrated through a pad of Celite<sup>®</sup> and flushed with ethyl acetate. Purification was performed by column chromatography. The corresponding eluent is stated for the particular product.

### 1,2,2-Trimethyl-5-oxo-4-phenyl-2,5-dihydro-1H-imidazole 3-oxide

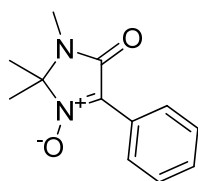

C<sub>12</sub>H<sub>14</sub>N<sub>2</sub>O<sub>2</sub>  
218,2518

The title compound was obtained as a yellowish solid (747 mg, 3.42 mmol, 97%). (PE:EtOAc = 8:2 → 1:1)

**R<sub>f</sub> (EtOAc):** 0.49 [UV, KMnO<sub>4</sub>]. **<sup>1</sup>H-NMR (400 MHz, CDCl<sub>3</sub>):** δ = 8.79 – 8.75 (m, 2H), 7.46 – 7.42 (m, 3H), 3.06 (s, 3H), 1.65 (s, 6H) ppm. **<sup>13</sup>C-NMR (101 MHz, CDCl<sub>3</sub>):** δ = 161.9, 130.9, 129.7, 128.3, 127.6, 126.2, 86.9, 25.5, 24.3 ppm. **IR (film):** ν<sub>max</sub> [cm<sup>-1</sup>] = 3064, 2988, 2936, 1697, 1553, 1488, 1424, 1401, 1382, 1356, 1304, 1288, 1218, 1200, 1153, 1117, 1075, 1022, 999, 952, 929. 898, 824, 777, 740, 690, 666, 649, 605, 552, 520, 454, 420. **LRMS (EI):** *m/z* (%) 218 (8) [M<sup>+</sup>], 202 (1) [(M-O)<sup>+</sup>], 187 (1) [((M-O)<sup>+</sup>-CH<sub>3</sub>)], 119 (12), 104 (9), 89 (10), 71 (20), 56 (100). **HRMS (ESI):** *m/z* 262.1542 [262.1550 calculated for C<sub>14</sub>H<sub>20</sub>N<sub>3</sub>O<sub>2</sub><sup>+</sup> (M+H<sup>+</sup>)].

### 1,2,2-Trimethyl-5-oxo-4-(*p*-tolyl)-2,5-dihydro-1*H*-imidazole 3-oxide

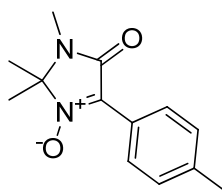

C<sub>13</sub>H<sub>16</sub>N<sub>2</sub>O<sub>2</sub>  
232,2783

The title compound was obtained as a pale yellow solid (192 mg, 0.83 mmol, 59%).  
(CH:EtOAc = 7:3)

**R<sub>f</sub> (EtOAc):** 0.46 [UV]. **<sup>1</sup>H-NMR (400 MHz, CDCl<sub>3</sub>):** δ = 8.75 – 8.69 (m, 2H), 7.30 – 7.26 (m, 2H), 3.09 (s, 3H), 2.39 (s, 3H), 1.68 (s, 6H) ppm. **<sup>13</sup>C-NMR (101 MHz, CDCl<sub>3</sub>):** δ = 162.1, 141.5, 129.8, 129.1, 127.6, 123.6, 86.7, 25.5, 24.3, 21.9 ppm. **IR (film):** ν<sub>max</sub> [cm<sup>-1</sup>] = 3080, 3052, 2995, 2937, 1703, 1612, 1553, 1506, 1433, 1397, 1357, 1320, 1305, 1287, 1266, 1212, 1188, 1155, 1116, 1021, 959, 901, 844, 819, 733, 702, 662, 639, 617, 570, 554, 522, 491, 460, 419. **LRMS (EI):** *m/z* (%) 232 (100) [M<sup>+</sup>], 201 (15) [(M-O)<sup>+</sup>-CH<sub>3</sub>], 133 (48), 103 (22), 73 (23), 56 (73). **HRMS (ESI):** *m/z* 255.1104 [255.1104 calculated for C<sub>13</sub>H<sub>16</sub>N<sub>2</sub>O<sub>2</sub>Na<sup>+</sup> (M+Na<sup>+</sup>)].

### 1,2,2-Trimethyl-5-oxo-4-(*m*-tolyl)-2,5-dihydro-1*H*-imidazole 3-oxide

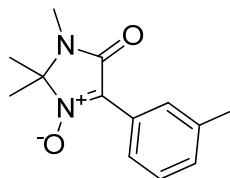

C<sub>13</sub>H<sub>16</sub>N<sub>2</sub>O<sub>2</sub>  
232,2783

The title compound was obtained as a pale yellow solid (645 mg, 2.78 mmol, 93%).  
(CH:EtOAc = 7:3)

**R<sub>f</sub> (EtOAc):** 0.46 [UV]. **<sup>1</sup>H-NMR (400 MHz, CDCl<sub>3</sub>):** δ = 8.64 – 8.61 (m, 1H), 8.59 – 8.55 (m, 1H), 7.35 (t, *J* = 7.8 Hz, 1H), 7.29 – 7.25 (m, 1H), 3.08 (s, 3H), 2.40 (d, *J* = 0.7 Hz, 3H), 1.67 (s, 6H) ppm. **<sup>13</sup>C-NMR (101 MHz, CDCl<sub>3</sub>):** δ = 161.9, 137.9, 131.8, 129.9, 128.2, 127.9, 126.1, 124.8, 86.8, 25.5, 24.3, 21.7 ppm. **IR (film):** ν<sub>max</sub> [cm<sup>-1</sup>] = 3067, 2989, 2918, 1697, 1600, 1579, 1551, 1476, 1429, 1395, 1382, 1352, 1307, 1284, 1229, 1200, 1188, 1171, 1147, 1112, 1026, 963, 918, 900, 872, 796, 767, 735, 694, 663, 607, 552, 439, 420. **LRMS**

**(EI):** 232 (65) [M<sup>+</sup>], 201 (11) [(M-O)<sup>+</sup>-CH<sub>3</sub>], 133 (38), 118 (13), 103 (15), 77 (15), 71 (18), 56 (100). **HRMS (ESI):** *m/z* 255.1101 [255.1104 calculated for C<sub>13</sub>H<sub>16</sub>N<sub>2</sub>O<sub>2</sub>Na<sup>+</sup> (M+Na<sup>+</sup>)].

#### 1,2,2-Trimethyl-5-oxo-4-(*o*-tolyl)-2,5-dihydro-1*H*-imidazole 3-oxide

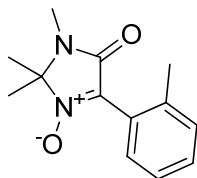

C<sub>13</sub>H<sub>16</sub>N<sub>2</sub>O<sub>2</sub>  
232,2783

The title compound was obtained as a yellowish solid (630 mg, 2.72 mmol, 90%).  
(CH:EtOAc = 7:3 → 1:1)

**R<sub>f</sub> (EtOAc):** 0.35 [UV]. **<sup>1</sup>H-NMR (600 MHz, CDCl<sub>3</sub>):** δ = 7.44 – 7.42 (m, 1H), 7.38 – 7.34 (m, 1H), 7.29 – 7.26 (m, 2H), 3.11 (s, 3H), 2.28 (s, 3H), 1.71 (s, 6H) ppm. **<sup>13</sup>C-NMR (151 MHz, CDCl<sub>3</sub>):** δ = 161.8, 139.1, 134.2, 130.7, 130.6, 130.0, 125.7, 123.9, 87.8, 25.7, 24.4, 20.1 ppm. **IR (film):** *v*<sub>max</sub> [cm<sup>-1</sup>] = 3054, 2987, 2936, 1699, 1604, 1567, 1492, 1425, 1398, 1383, 1356, 1303, 1284, 1268, 1227, 1204, 1189, 1159, 1133, 1101, 1022, 953, 902, 838, 769, 731, 700, 672, 648, 610, 555, 446, 413. **LRMS (EI):** *m/z* (%) 215 (10) [(M-O)<sup>+</sup>], 201 (7) [(M-O)<sup>+</sup>-CH<sub>3</sub>], 72 (10), 56 (100). **HRMS (ESI):** *m/z* 255.1103 [255.1104 calculated for C<sub>13</sub>H<sub>16</sub>N<sub>2</sub>O<sub>2</sub>Na<sup>+</sup> (M+Na<sup>+</sup>)].

#### 4-(4-Chlorophenyl)-1,2,2-trimethyl-5-oxo-2,5-dihydro-1*H*-imidazole 3-oxide

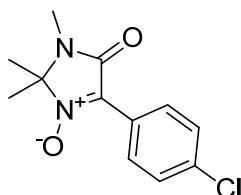

C<sub>12</sub>H<sub>13</sub>ClN<sub>2</sub>O<sub>2</sub>  
252,6968

The title compound was obtained as a pale yellowish solid (663 mg, 2.62 mmol, 87%).  
(CH:EtOAc = 7:3)

**R<sub>f</sub> (EtOAc):** 0.46 [UV]. **<sup>1</sup>H-NMR (400 MHz, CDCl<sub>3</sub>):** δ = 8.84 – 8.78 (m, 2H), 7.46 – 7.40 (m, 2H), 3.09 (s, 3H), 1.68 (s, 6H) ppm. **<sup>13</sup>C-NMR (101 MHz, CDCl<sub>3</sub>):** δ = 161.7, 136.8, 128.9, 128.7, 124.8, 87.2, 25.6, 24.3 ppm. **IR (film):** *v*<sub>max</sub> [cm<sup>-1</sup>] = 3083, 2994, 2937, 1699, 1590, 1560, 1543, 1486, 1434, 1393, 1358, 1315, 1293, 1214, 1202, 1178, 1158, 1118, 1087,

1031, 1012, 957, 902, 827, 736, 705, 690, 662, 613, 556, 517, 489, 460, 412. **LRMS (EI):**  $m/z$  (%) 252 (9) [ $M^+$ ], 236 (4) [( $M-O$ ) $^+$ ], 221 (8) [( $(M-O)^+-CH_3$ )], 138 (8), 71 (20), 56 (100). **HRMS (ESI):**  $m/z$  253.0738 [253.0738 calculated for  $C_{12}H_{14}N_2O_2Cl^+$  ( $M+H^+$ )].

#### 4-(4-fluorophenyl)-1,2,2-trimethyl-5-oxo-2,5-dihydro-1H-imidazole 3-oxide

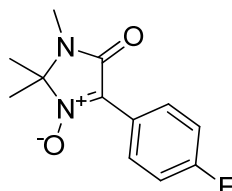

$C_{12}H_{13}FN_2O_2$   
236,2422

The title compound was obtained as a light yellowish solid (624 mg, 2.64 mmol, 88%). (CH:EtOAc = 7:3)

**R<sub>f</sub> (EtOAc):** 0.46 [UV]. **<sup>1</sup>H-NMR (400 MHz, CDCl<sub>3</sub>):**  $\delta$  = 8.93 – 8.85 (m, 2H), 7.19 – 7.11 (m, 2H), 3.10 (s, 3H), 1.69 (s, 6H) ppm. **<sup>13</sup>C-NMR (101 MHz, CDCl<sub>3</sub>):**  $\delta$  = 165.1, 162.20 (d,  $J$  = 77.6 Hz), 130.11 (d,  $J$  = 8.4 Hz), 122.66 (d,  $J$  = 3.3 Hz), 115.53 (d,  $J$  = 21.5 Hz), 87.0, 25.6, 24.3 ppm. **IR (film):**  $\nu_{max}$  [cm<sup>-1</sup>] = 3054, 2989, 1699, 1602, 1558, 1504, 1434, 1415, 1397, 1384, 1358, 1313, 1298, 1265, 1237, 1213, 1162, 1117, 1100, 1016, 954, 899, 843, 786, 732, 703, 664, 632, 619, 569, 551, 528, 467, 417. **LRMS (EI):**  $m/z$  (%) 236 (29) [ $M^+$ ], 220 (4) [( $M-O$ ) $^+$ ], 205 (9) [( $(M-O)^+-CH_3$ )], 137 (8), 122 (10), 107 (9), 71 (30), 56 (100). **HRMS (ESI):**  $m/z$  237.1035 [237.1034 calculated for  $C_{12}H_{14}N_2O_2F^+$  ( $M+H^+$ )].

#### 4-(4-Methoxyphenyl)-1,2,2-trimethyl-5-oxo-2,5-dihydro-1H-imidazole 3-oxide

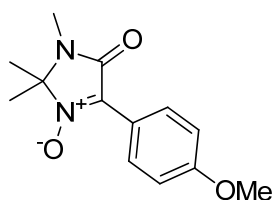

$C_{13}H_{16}N_2O_3$   
248,2777

The title compound was obtained as a white solid (250 mg, 1.01 mmol, 84%). (PE:EtOAc = 8:2 → 2:3)

**R<sub>f</sub> (PE:EtOAc = 1:1):** 0.20 [UV]. **<sup>1</sup>H-NMR (400 MHz, CDCl<sub>3</sub>):**  $\delta$  = 8.87 – 8.82 (m, 2H), 6.99 – 6.94 (m, 2H), 3.84 (s, 3H), 3.08 (s, 3H), 1.66 (s, 6H) ppm. **<sup>13</sup>C-NMR (101 MHz, CDCl<sub>3</sub>):**  $\delta$  = 162.1, 161.4, 129.9, 129.5, 119.1, 113.7, 86.4 55.4 25.5, 24.2 ppm. **IR (film):**

$\nu_{\max}$  [ $\text{cm}^{-1}$ ] = 3078, 3002, 2929, 2854, 2562, 1696, 1604, 1557, 1504, 1442, 1399, 1381, 1358, 1317, 1295, 1259, 1212, 1177, 1158, 1117, 1108, 1023, 955, 904, 836, 809, 776, 733, 689, 659, 634, 579, 556, 531, 470. **LRMS (EI):**  $m/z$  (%) 248 (52) [ $\text{M}^+$ ], 233 (2) [( $\text{M}-\text{CH}_3$ ) $^+$ ], 217 (5) [( $\text{M}-\text{CH}_3-\text{O}$ ) $^+$ ], 203 (5), 149 (51), 147 (58), 134 (12), 119 (48), 106 (8), 71 (25), 56 (100). **HRMS (ESI):**  $m/z$  271.1052 [271.1053 calculated for  $\text{C}_{13}\text{H}_{16}\text{N}_2\text{O}_3\text{Na}^+$  ( $\text{M}+\text{Na}^+$ )].

#### 4-(4-Cyanophenyl)-1,2,2-trimethyl-5-oxo-2,5-dihydro-1H-imidazole 3-oxide

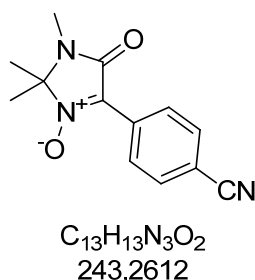

The title compound was obtained as a yellow solid (343 mg, 1.41 mmol, 94%). (CH:EtOAc = 7:3  $\rightarrow$  1:1)

**R<sub>f</sub> (EtOAc):** 0.39 [UV,  $\text{KMnO}_4$ ].  **$^1\text{H-NMR}$  (400 MHz,  $\text{CDCl}_3$ ):**  $\delta$  = 8.98 – 8.91 (m, 2H), 7.75 – 7.69 (m, 2H), 3.10 (s, 3H), 1.69 (s, 6H) ppm.  **$^{13}\text{C-NMR}$  (101 MHz,  $\text{CDCl}_3$ ):**  $\delta$  = 161.3, 132.0, 130.2, 128.3, 127.6, 118.5, 113.8, 87.9, 25.6, 24.3 ppm. **IR (film):**  $\nu_{\max}$  [ $\text{cm}^{-1}$ ] = 3086, 3065, 3048, 2996, 2940, 2229, 1694, 1606, 1547, 1502, 1438, 1416, 1398, 1385, 1364, 1306, 1220, 1201, 1188, 1152, 1117, 1020, 997, 952, 900, 855, 732, 668, 643, 614, 556, 527, 451, 417. **LRMS (EI):**  $m/z$  (%) 243 (18) [ $\text{M}^+$ ], 228 (2) [( $\text{M}-\text{CH}_3$ ) $^+$ ], 213 (4), 144 (5), 114 (6), 71 (25), 56 (100). **HRMS ESI:**  $m/z$  266.0898 [266.0900 calculated for  $\text{C}_{13}\text{H}_{13}\text{N}_3\text{O}_2\text{Na}^+$  ( $\text{M}+\text{Na}^+$ )].

#### 4-(4-(Dimethylamino)phenyl)-1,2,2-trimethyl-5-oxo-2,5-dihydro-1H-imidazol-3-oxide

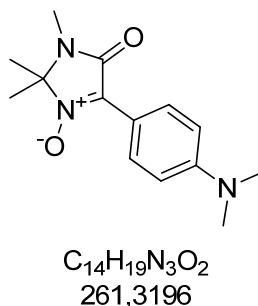

The title compound was obtained as a yellow solid (476 mg, 1.82 mmol, 73%). (PE:EtOAc = 8:2  $\rightarrow$  EtOAc).

**R<sub>f</sub> (EtOAc):** 0.38 [UV, Ninhydrin, KMnO<sub>4</sub>]. **<sup>1</sup>H-NMR (400 MHz, CDCl<sub>3</sub>):** δ = 8.86 – 8.81 (m, 2H), 6.75 – 6.71 (m, 2H), 3.08 (s, 3H), 3.04 (s, 6H), 1.66 (s, 6H) ppm. **<sup>13</sup>C-NMR (101 MHz, CDCl<sub>3</sub>):** δ = 162.5, 151.7, 129.8, 129.1, 114.3, 111.1, 85.7, 40.1, 25.4, 24.2 ppm. **IR (film):** ν<sub>max</sub> [cm<sup>-1</sup>] = 3090, 2986, 2934, 2812, 1694, 1601, 1559, 1517, 1444, 1423, 1398, 1350, 1324, 1294, 1214, 1202, 1154, 1111, 1066, 1023, 944, 902, 823, 734, 652, 634, 566, 553, 532, 410. **LRMS (EI):** *m/z* (%) 261 (9) [M<sup>+</sup>], 245 (7) [(M-O)<sup>+</sup>], 230 (14) [(M-O)<sup>+</sup>-CH<sub>3</sub>], 207 (11), 162 (28), 145 (15), 132 (34), 115 (11), 90 (11), 73 (17), 56 (100). **HRMS (ESI):** *m/z* 219.1131 [219.1128 calculated for C<sub>12</sub>H<sub>15</sub>N<sub>2</sub>O<sub>2</sub><sup>+</sup> (M+H<sup>+</sup>)].

### General procedure for the deoxygenation of the nitrones with NaBH<sub>4</sub>

Sodium borohydride (3.0 eq.) was added to a solution of the nitron in ethanol (abs., 0.04 M solution) and the resulting reaction mixture was stirred at the corresponding temperature (room temperature in most cases) until satisfying conversion (controlled by TLC) was visible (in most cases over night). It was diluted with ethyl acetate and brine, the layers were separated and the aqueous layer was extracted with ethyl acetate. The combined organic layers were dried over MgSO<sub>4</sub>, filtered and the solvent was removed under reduced pressure. Purification was performed by column chromatography. (PE:EtOAc = 1:0 → 0:1)

### 1,2,2-Trimethyl-4-phenyl-1*H*-imidazol-5(2*H*)-one (1a)

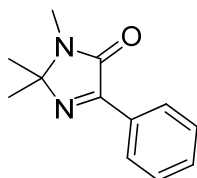

C<sub>12</sub>H<sub>14</sub>N<sub>2</sub>O  
202,2524

The title compound was obtained as a white solid (411.0 mg, 2.03 mmol, 66%).

**R<sub>f</sub> (EtOAc):** 0.46 [UV, KMnO<sub>4</sub>]. **<sup>1</sup>H-NMR (600 MHz, CDCl<sub>3</sub>):** δ = 8.47 – 8.44 (m, 2H), 7.54 – 7.51 (m, 1H), 7.50 – 7.46 (m, 2H), 3.06 (s, 3H), 1.52 (s, 6H) ppm. **<sup>13</sup>C-NMR (151 MHz, CDCl<sub>3</sub>):** δ = 162.4, 161.3, 131.5, 130.8, 128.4, 128.4, 83.2, 25.6, 24.5 ppm. **IR (film):** ν<sub>max</sub> [cm<sup>-1</sup>] = 3068, 2980, 2931, 1696, 1604, 1572, 1494, 1449, 1421, 1396, 1380, 1363, 1325, 1305, 1272, 1196, 1182, 1154, 1100, 1073, 1029, 997, 965, 916, 806, 751, 693, 657, 631, 616, 580, 557, 535. **LRMS (EI):** *m/z* (%) 202 (4) [M<sup>+</sup>], 187 (11) [(M-CH<sub>3</sub>)<sup>+</sup>], 145 (5) [(M-CH<sub>3</sub>)<sup>+</sup>-



C<sub>3</sub>H<sub>6</sub>], 104 (21), 77 (8), 71 (26), 56 (100). **HRMS (ESI):** *m/z* 203.1178 [203.1179 calculated for C<sub>12</sub>H<sub>15</sub>N<sub>2</sub>O<sup>+</sup> (M+H<sup>+</sup>)].

**1,2,2-Trimethyl-4-(*p*-tolyl)-1*H*-imidazol-5(2*H*)-one (1b)**

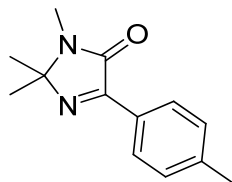

C<sub>13</sub>H<sub>16</sub>N<sub>2</sub>O  
216,2789

The title compound was obtained as a colourless solid (89 mg, 0.41 mmol, 96%).

**R<sub>f</sub> (CH:EtOAc = 1:1):** 0.34 [UV, KMnO<sub>4</sub>]. **<sup>1</sup>H-NMR (400 MHz, CDCl<sub>3</sub>):** δ = 8.36 – 8.30 (m, 2H), 7.28 – 7.23 (m, 2H), 3.01 (s, 3H), 2.39 (s, 3H), 1.47 (s, 6H) ppm. **<sup>13</sup>C-NMR (101 MHz, CDCl<sub>3</sub>):** δ = 162.7, 161.2, 142.0, 129.3, 128.4, 128.2, 83.1, 25.7, 24.6, 21.7 ppm. **IR (film):** ν<sub>max</sub> [cm<sup>-1</sup>] = 2980, 2931, 1694, 1612, 1601, 1565, 1513, 1455, 1422, 1396, 1380, 1363, 1343, 1321, 1303, 1274, 1192, 1182, 1155, 1100, 1039, 1023, 1001, 964, 917, 832, 784, 715, 641, 625, 600, 556, 535. **LRMS (EI):** *m/z* (%) 216 (44) [M<sup>+</sup>], 201 (67) [(M-CH<sub>3</sub>)<sup>+</sup>], 159 (14), 118 (30), 71 (36), 56 (100). **HRMS (ESI):** *m/z* 239.1154 [239.1155 calculated for C<sub>13</sub>H<sub>16</sub>N<sub>2</sub>ONa<sup>+</sup> (M+Na<sup>+</sup>)].

**1,2,2-Trimethyl-4-(*m*-tolyl)-1*H*-imidazol-5(2*H*)-one (1c)**

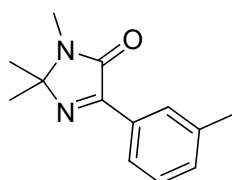

C<sub>13</sub>H<sub>16</sub>N<sub>2</sub>O  
216,2789

The title compound was obtained as a colourless solid (256 mg, 1.18 mmol, 68%).

**R<sub>f</sub> (CH:EtOAc = 1:1):** 0.37 [UV, KMnO<sub>4</sub>]. **<sup>1</sup>H-NMR (400 MHz, CDCl<sub>3</sub>):** δ = 8.28 – 8.24 (m, 1H), 8.21 – 8.19 (m, 1H), 7.37 – 7.29 (m, 2H), 3.03 (s, 3H), 2.41 (s, 3H), 1.49 (s, 6H) ppm. **<sup>13</sup>C-NMR (101 MHz, CDCl<sub>3</sub>):** δ = 162.6, 161.6, 138.3, 132.5, 130.8, 128.8, 128.5, 125.8, 83.3, 25.7, 24.7, 21.5 ppm. **IR (film):** ν<sub>max</sub> [cm<sup>-1</sup>] = 2981, 2931, 1697, 1597, 1584, 1456, 1421, 1399, 1380, 1362, 1327, 1311, 1274, 1205, 1195, 1153, 1089, 1011, 917, 895, 809, 774, 734, 692, 659, 630, 584, 554, 450. **LRMS (EI):** *m/z* (%) 216 (49) [M<sup>+</sup>], 201 (64)

[(M-CH<sub>3</sub>)<sup>+</sup>], 159 (21), 118 (37), 71 (42), 56 (100). **HRMS (ESI):** *m/z* 239.1156 [239.1155 calculated for C<sub>13</sub>H<sub>16</sub>N<sub>2</sub>ONa<sup>+</sup> (M+Na<sup>+</sup>)].

#### 1,2,2-Trimethyl-4-(*o*-tolyl)-1*H*-imidazol-5(2*H*)-one (1d)

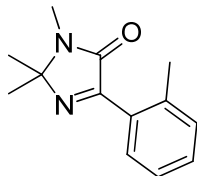

C<sub>13</sub>H<sub>16</sub>N<sub>2</sub>O  
216,2789

The title compound was obtained as a colourless solid (345 mg, 1.59 mmol, 73%).

**R<sub>f</sub>** (CH:EtOAc = 1:1): 0.35 [UV, KMnO<sub>4</sub>]. **<sup>1</sup>H-NMR (400 MHz, CDCl<sub>3</sub>):** δ = 7.85 (dd, *J* = 8.0, 1.6 Hz, 1H), 7.37 – 7.32 (m, 1H), 7.30 – 7.25 (m, 2H), 3.04 (s, 3H), 2.49 (s, 3H), 1.52 (s, 6H) ppm. **<sup>13</sup>C-NMR (101 MHz, CDCl<sub>3</sub>):** δ = 164.6, 162.6, 138.2, 131.1, 130.3, 130.1, 129.9, 125.7, 83.9, 25.9, 24.8, 20.8 ppm. **IR (film):** ν<sub>max</sub> [cm<sup>-1</sup>] = 2981, 2931, 1696, 1612, 1493, 1455, 1422, 1400, 1380, 1363, 1309, 1267, 1196, 1157, 1087, 998, 966, 914, 803, 777, 733, 723, 701, 652, 629, 584, 560, 466. **LRMS (EI):** *m/z* (%) 216 (92) [M<sup>+</sup>], 201 (100) [(M-CH<sub>3</sub>)<sup>+</sup>], 185 (13), 158 (27), 144 (24), 117 (32), 72 (25), 56 (86). **HRMS (ESI):** *m/z* 239.1159 [239.1155 calculated for C<sub>13</sub>H<sub>16</sub>N<sub>2</sub>ONa<sup>+</sup> (M+Na<sup>+</sup>)].

#### 4-(4-Chlorophenyl)-1,2,2-trimethyl-1*H*-imidazol-5(2*H*)-one (1e)

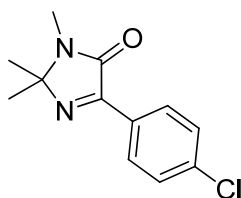

C<sub>12</sub>H<sub>13</sub>ClN<sub>2</sub>O  
236,6974

The title compound was obtained as a colourless solid (243 mg, 1.03 mmol, 55%).

**R<sub>f</sub>** (CH:EtOAc = 1:1): 0.30 [UV, KMnO<sub>4</sub>]. **<sup>1</sup>H-NMR (400 MHz, CDCl<sub>3</sub>):** δ = 8.43 – 8.37 (m, 2H), 7.46 – 7.40 (m, 2H), 3.03 (s, 3H), 1.49 (s, 6H) ppm. **<sup>13</sup>C-NMR (101 MHz, CDCl<sub>3</sub>):** δ = 162.3, 160.5, 138.0, 129.9, 129.4, 128.9, 83.5, 25.8, 24.6 ppm. **IR (film):** ν<sub>max</sub> [cm<sup>-1</sup>] = 2981, 2932, 1697, 1605, 1563, 1486, 1456, 1423, 1396, 1380, 1363, 1314, 1297, 1271, 1189, 1175, 1155, 1088, 1016, 999, 964, 916, 842, 824, 786, 713, 637, 621, 585, 556, 533, 490.

**LRMS (EI):**  $m/z$  (%) 236 (19) [ $M^+$ ], 221 (38) [( $M - CH_3$ ) $^+$ ], 138 (19), 137 (21), 102 (12), 71 (18), 56 (100). **HRMS (ESI):**  $m/z$  237.0785 [237.0789 calculated for  $C_{12}H_{14}N_2OCl^+$  ( $M+H^+$ )].

**4-(4-Fluorophenyl)-1,2,2-trimethyl-1H-imidazol-5(2H)-one (1f)**

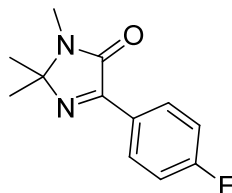

$C_{12}H_{13}FN_2O$   
220,2428

The title compound was obtained as a colourless solid (264 mg, 1.19 mmol, 66%).

**R<sub>f</sub> (CH:EtOAc = 1:1):** 0.30 [UV,  $KMnO_4$ ].  **$^1H$ -NMR (400 MHz,  $CDCl_3$ ):**  $\delta$  = 8.50 – 8.45 (m, 2H), 7.17 – 7.10 (m, 2H), 3.03 (s, 3H), 1.49 (s, 6H) ppm.  **$^{13}C$ -NMR (101 MHz,  $CDCl_3$ ):**  $\delta$  = 166.3, 163.14 (d,  $J$  = 136.5 Hz), 160.3, 130.87 (d,  $J$  = 8.8 Hz), 127.24 (d,  $J$  = 3.3 Hz), 115.73 (d,  $J$  = 21.6 Hz), 83.4, 25.8, 24.6 ppm. **IR (film):**  $\nu_{max}$  [ $cm^{-1}$ ] = 2983, 2934, 1696, 1608, 1508, 1457, 1426, 1411, 1400, 1380, 1364, 1317, 1296, 1266, 1225, 1192, 1155, 1094, 1000, 966, 918, 848, 790, 732, 702, 639, 621, 599, 558, 539. **LRMS (EI):**  $m/z$  (%) 220 (22) [ $M^+$ ], 205 (67) [( $M - CH_3$ ) $^+$ ], 213 (4), 163 (10), 122 (41), 71 (22), 56 (100). **HRMS (ESI):**  $m/z$  221.1085 [221.1085 calculated for  $C_{12}H_{14}N_2OF^+$  ( $M+H^+$ )].

**4-(4-Methoxyphenyl)-1,2,2-trimethyl-1H-imidazol-5(2H)-one (1g)**

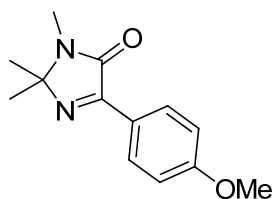

$C_{13}H_{16}N_2O_2$   
232,2783

The title compound was obtained as a white solid (49 mg, 0.21 mmol, 63%). The reaction was carried out 45 °C.

**R<sub>f</sub> (PE:EtOAc = 1:1):** 0.31 [UV].  **$^1H$ -NMR (600 MHz,  $CDCl_3$ ):**  $\delta$  = 8.45 – 8.40 (m, 2H), 6.98 – 6.93 (m, 2H), 3.85 (s, 3H), 3.01 (s, 3H), 1.47 (s, 6H) ppm.  **$^{13}C$ -NMR (101 MHz,  $CDCl_3$ ):**  $\delta$  = 162.8, 162.4, 160.5, 130.3, 123.7, 114.0, 83.0, 55.5, 25.7, 24.7 ppm. **IR (film):**  $\nu_{max}$  [ $cm^{-1}$ ] = 3077, 2978, 2931, 2839, 1693, 1605, 1569, 1510, 1458, 1442, 1417, 1397, 1380, 1363, 1324, 1304, 1250, 1173, 1157, 1100, 1029, 998, 965, 918, 842, 791, 776, 641, 621, 603,

557, 544, 485. **LRMS (EI):**  $m/z$  (%) 232 (14) [ $M^+$ ], 217 (27) [ $(M-CH_3)^+$ ], 134 (10), 71 (16), 56 (100). **HRMS (ESI):**  $m/z$  233.1285 [233.1285 calculated for  $C_{13}H_{17}N_2O_2^+$  ( $M+H^+$ )].

#### 4-(1,2,2-Trimethyl-5-oxo-2,5-dihydro-1H-imidazol-4-yl)benzonitrile (1h)

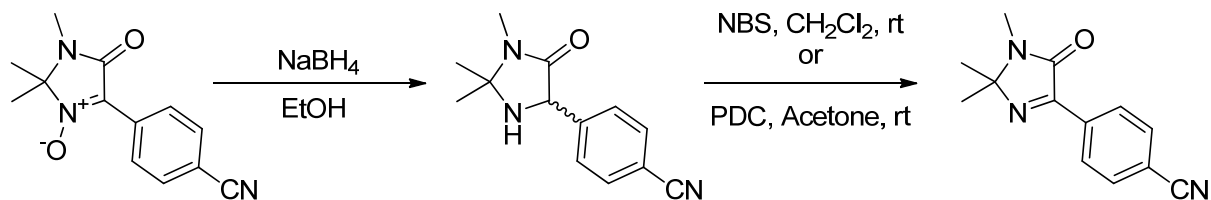

The reduction of the nitron led to the formation of the corresponding amine quantitatively. It could be oxidized to the desired imine either by using *N*-Bromosuccinimide or PDC.

#### Oxidation using *N*-bromosuccinimide

*N*-Bromosuccinimide (85.4 mg, 0.48 mmol, 1.1 eq.) was added to a solution of the amine (100.0 mg, 0.44 mmol) in methylene chloride (abs., 14 ml). The reaction mixture was stirred at room temperature for 5 h and quenched with  $Na_2S_2O_3$  solution (saturated, aq.). The layers were separated and the aqueous layer was extracted with methylene chloride. The combined organic layers were dried over  $MgSO_4$ , filtrated and concentrated under reduced pressure. The crude product was purified by column chromatography. (PE:EtOAc = 1:1  $\rightarrow$  2:8)

The title compound was obtained as a white solid (50 mg, 0.22 mmol, 50%).

#### Oxidation using pyridiniumdichromate

Pyridiniumdichromate (116.5 mg, 0,31 mmol, 0.71 eq.) was added to a solution of the amine (100.0 mg, 0.44 mmol) in acetone (5 ml). The resulting mixture was stirred at room temperature over night and filtrated through a pad of Celite<sup>®</sup>. After concentration under reduced pressure, the crude product was purified by column chromatography. (PE:EtOAc = 1:1  $\rightarrow$  2:8)

The title compound was obtained as a white solid (79 mg, 0.35 mmol, 80%).

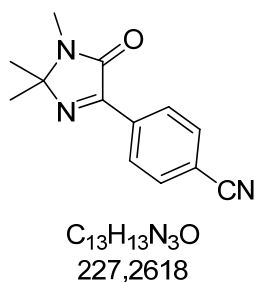

**R<sub>f</sub> (EtOAc):** 0.39 [UV, KMnO<sub>4</sub>]. **<sup>1</sup>H-NMR (400 MHz, CDCl<sub>3</sub>):** δ = 8.98 – 8.91 (m, 2H), 7.75 – 7.69 (m, 2H), 3.10 (s, 3H), 1.69 (s, 6H) ppm. **<sup>13</sup>C-NMR (101 MHz, CDCl<sub>3</sub>):** δ = 161.3, 132.0, 130.2, 128.3, 127.6, 118.5, 113.8, 87.9, 25.6, 24.3 ppm. **IR (film):** ν<sub>max</sub> [cm<sup>-1</sup>] = 3086, 3065, 3048, 2996, 2940, 2229, 1694, 1606, 1547, 1502, 1438, 1416, 1398, 1385, 1364, 1306, 1220, 1201, 1188, 1152, 1117, 1020, 997, 952, 900, 855, 732, 668, 643, 614, 556, 527, 451, 417. **LRMS (EI):** *m/z* (%) 243 (18) [M<sup>+</sup>], 228 (2) [(M- CH<sub>3</sub>)<sup>+</sup>], 213 (4), 144 (5), 114 (6), 71 (25), 56 (100). **HRMS ESI:** *m/z* 266.0898 [266.0900 calculated for C<sub>13</sub>H<sub>13</sub>N<sub>3</sub>ONa<sup>+</sup> (M+Na<sup>+</sup>)].

#### 4-(4-(Dimethylamino)phenyl)-1,2,2-trimethyl-1*H*-imidazol-5(2*H*)-one (1i)

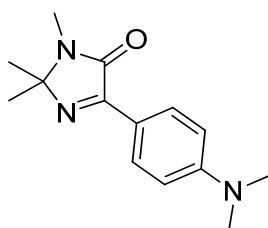

C<sub>14</sub>H<sub>19</sub>N<sub>3</sub>O  
245,3202

The title compound was obtained as a yellowish solid (100 mg, 0.41 mmol, 51%). The reaction was carried out 60 °C.

**R<sub>f</sub>(EtOAc):** 0.55 [UV, KMnO<sub>4</sub>] **<sup>1</sup>H-NMR (600 MHz, CDCl<sub>3</sub>):** δ = 8.40 – 8.35 (m, 2H), 6.74 – 6.68 (m, 2H), 3.03 (s, 6H), 3.00 (s, 3H), 1.46 (s, 6H) ppm. **<sup>13</sup>C-NMR (151 MHz, CDCl<sub>3</sub>):** δ = 163.4, 160.3, 152.6, 129.9, 118.8, 111.5, 82.7, 77.4, 40.2, 25.6, 24.9 ppm. **IR (film):** ν<sub>max</sub> [cm<sup>-1</sup>] = 3511, 3080, 2977, 2928, 2809, 1688, 1606, 1588, 1521, 1476, 1446, 1421, 1397, 1360, 1328, 1302, 1272, 1230, 1191, 1156, 1127, 1098, 1064, 1011, 997, 944, 918, 827, 791, 742, 726, 641, 622, 594, 555, 539, 483. **LRMS (EI):** *m/z* (%) 245 (4) [M<sup>+</sup>], 230 (9) [(M- CH<sub>3</sub>)<sup>+</sup>], 146 (7), 145 (8), 56 (100). **HRMS (ESI):** *m/z* 246.1595 [246.1601 calculated for C<sub>14</sub>H<sub>20</sub>N<sub>3</sub>O<sub>1</sub><sup>+</sup> (M+H<sup>+</sup>)].

## Aliphatic substrates

The aliphatic substrates were synthesized according to an optimised procedure of Blandin and Chavant *et al.*<sup>2</sup>

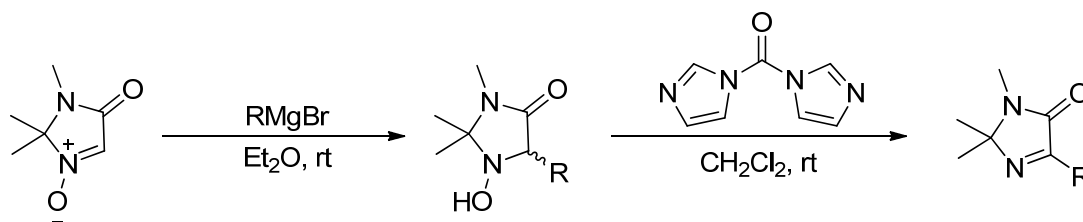

## General procedure for the synthesis of the aliphatic substrates

A freshly prepared solution of Grignard-reagent (2.0 M in diethyl ether, 3.0 ml, 2.0 eq.) was added to a suspension of the nitron (213.2 mg, 1.5 mmol) in diethyl ether (8 ml, abs.). The resulting suspension was stirred at room temperature until satisfying conversion was determined (controlled by TLC). Ammonium chloride solution (saturated, aq.) was added and the layers were separated. The aqueous layer was extracted with diethyl ether, the combined organic layers were dried over MgSO<sub>4</sub>, filtrated and concentrated under reduced pressure. At this stage, the hydroxylamine was partly dehydratised to the corresponding imine. Thus, the crude product was shortly filtrated over a pad of silica gel and flushed with ethyl acetate. After evaporation of the solvent the residue was directly used in the following step without further purification.

The crude product was solved in methylene chloride (abs., 0.16 M solution) and carbonyldiimidazole (1.5 eq. based on the crude mass) was added. The resulting solution was stirred at room temperature until satisfying conversion was determined (controlled by TLC) and was concentrated under reduced pressure. The crude mixture was purified by column chromatography. (PE:EtOAc = 1:0 → 0:1)

## 4-Hexyl-1,2,2-trimethyl-1H-imidazol-5(2H)-one (1j)

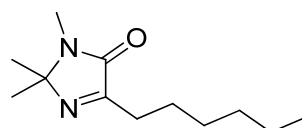

C<sub>12</sub>H<sub>22</sub>N<sub>2</sub>O  
210,3159

The title compound was obtained as a pale yellow liquid (151 mg, 0.72 mmol, 48% over 2 steps).

**R<sub>f</sub> (EtOAc):** 0.39 [UV, CAM, KMnO<sub>4</sub>] **<sup>1</sup>H-NMR (400 MHz, CDCl<sub>3</sub>):** δ = 2.93 (s, 3H), 2.58 – 2.50 (m, 2H), 1.68 (tt, *J* = 7.7, 6.7 Hz, 2H), 1.37 (s, 6H), 1.36 – 1.25 (m, 6H), 0.90 – 0.81 (m, 3H) ppm. **<sup>13</sup>C-NMR (101 MHz, CDCl<sub>3</sub>):** δ = 168.8, 162.9, 84.2, 31.5, 29.0, 28.6, 25.7, 25.5, 24.4, 22.6, 14.1 ppm. **IR (film):** ν<sub>max</sub> [cm<sup>-1</sup>] = 2955, 2929, 2858, 1701, 1634, 1458, 1424, 1402, 1379, 1364, 1279, 1197, 1151, 1038, 911, 726, 679, 659, 607, 556. **LRMS (EI):** *m/z* (%) 210 (3) [M<sup>+</sup>], 195 (40) [(M- CH<sub>3</sub>)<sup>+</sup>], 140 (19), 125 (90), 82 (9), 71 (17), 56 (100). **HRMS (ESI):** *m/z* 211.1794 [211.1805 calculated for C<sub>12</sub>H<sub>23</sub>N<sub>2</sub>O<sup>+</sup> (M+H<sup>+</sup>)].

#### 4-Isobutyl-1,2,2-trimethyl-1*H*-imidazol-5(2*H*)-one (1k)

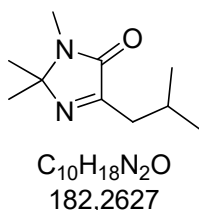

The title compound was obtained as a yellowish liquid (132 mg, 0.72 mmol, 48% over 2 steps)

**R<sub>f</sub> (EtOAc):** 0.37 [UV, KMnO<sub>4</sub>]. **<sup>1</sup>H-NMR (400 MHz, CDCl<sub>3</sub>):** δ = 2.93 (s, 3H), 2.42 (d, *J* = 7.2 Hz, 2H), 2.17 (dq, *J* = 13.6, 6.8 Hz, 1H), 1.37 (s, 6H), 0.94 (d, *J* = 6.6 Hz, 6H) ppm. **<sup>13</sup>C-NMR (101 MHz, CDCl<sub>3</sub>):** δ = 168.1, 163.1, 84.2, 37.2, 26.1, 25.6, 24.5, 22.6 ppm. **IR (film):** ν<sub>max</sub> [cm<sup>-1</sup>] = 2957, 2932, 2871, 1750, 1701, 1633, 1464, 1424, 1402, 1365, 1306, 1271, 1195, 1167, 1151, 1037, 919, 682, 662, 606, 556. **LRMS (EI):** *m/z* (%) 182 (8) [M<sup>+</sup>], 167 (31) [(M- CH<sub>3</sub>)<sup>+</sup>], 140 (21), 125 (67), 82 (16), 71 (19), 56 (100). **HRMS (ESI):** *m/z* 183.1492 [183.1492 calculated for C<sub>10</sub>H<sub>19</sub>N<sub>2</sub>O<sup>+</sup> (M+H<sup>+</sup>)].

#### 4-Benzyl-1,2,2-trimethyl-1*H*-imidazol-5(2*H*)-one (2l)

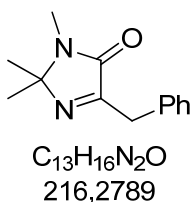

The title compound was obtained as a yellow liquid that crystallised upon storage (162 mg, 0.75 mmol, 50% over 2 steps).

**R<sub>f</sub> (EtOAc):** 0.41 [UV, KMnO<sub>4</sub>] **<sup>1</sup>H-NMR (400 MHz, CDCl<sub>3</sub>):** δ = 7.37 – 7.33 (m, 2H), 7.34 – 7.25 (m, 2H), 7.25 – 7.19 (m, 1H), 3.90 (s, 2H), 2.93 (s, 3H), 1.38 (s, 6H) ppm. **<sup>13</sup>C-NMR (101 MHz, CDCl<sub>3</sub>):** δ = 167.0, 162.5, 135.3, 129.3, 128.6, 126.8, 84.3, 34.8, 25.5, 24.2 ppm.

**IR (film):**  $\nu_{\max}$  [ $\text{cm}^{-1}$ ] = 3062, 3030, 2980, 2931, 1699, 1633, 1601, 1495, 1454, 1423, 1401, 1381, 1363, 1306, 1273, 1194, 1150, 1036, 948, 750, 698, 679, 657, 639, 604, 585, 556, 463, 420. **LRMS (EI):**  $m/z$  (%) 216 (27) [ $\text{M}^+$ ], 215 (21), 201 (21) [( $\text{M}-\text{CH}_3$ ) $^+$ ], 144 (10), 117 (12), 91 (28), 71 (14), 56 (100). **HRMS (ESI):**  $m/z$  217.1327 [217.1335 calculated for  $\text{C}_{13}\text{H}_{17}\text{N}_2\text{O}^+$  ( $\text{M}+\text{H}^+$ )].

#### 4-Isopropyl-1,2,2-trimethyl-1H-imidazol-5(2H)-one (1m)

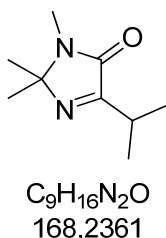

The title compound was obtained as a yellow liquid (382 mg, 2.27 mmol, 50% over 2 steps).

**R<sub>f</sub> (EtOAc):** 0.29 [UV, CAM,  $\text{KMnO}_4$ ].  **$^1\text{H-NMR}$  (400 MHz,  $\text{CDCl}_3$ ):**  $\delta$  = 3.01 – 2.93 (m, 1H), 2.92 (s, 3H), 1.36 (s, 6H), 1.23 (d,  $J$  = 6.9 Hz, 6H) ppm.  **$^{13}\text{C-NMR}$  (101 MHz,  $\text{CDCl}_3$ ):**  $\delta$  = 172.6, 162.5, 83.9, 28.1, 25.4, 24.5, 19.4 ppm. **IR (film):**  $\nu_{\max}$  [ $\text{cm}^{-1}$ ] = 3481, 2973, 2933, 2875, 1774, 1697, 1631, 1459, 1424, 1399, 1382, 1365, 1283, 1269, 1222, 1197, 1162, 1147, 1097, 1018, 910, 826, 796, 701, 638, 611, 584, 557, 504. **LRMS (EI):**  $m/z$  (%) 168 (8) [ $\text{M}^+$ ], 153 (14) [( $\text{M}-\text{CH}_3$ ) $^+$ ], 140 (11), 96 (18), 71 (33), 56 (100). **HRMS (ESI):**  $m/z$  169.1336 [169.1335 calculated for  $\text{C}_9\text{H}_{17}\text{N}_2\text{O}^+$  ( $\text{M}+\text{H}^+$ )].

#### 4-Cyclohexyl-1,2,2-trimethyl-1H-imidazol-5(2H)-one (1n)

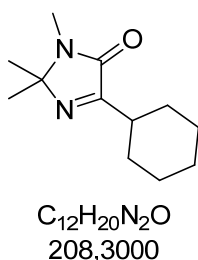

The title compound was obtained as a colourless liquid (179 mg, 0.86 mmol, 57% over 2 steps).

**R<sub>f</sub> (EtOAc):** 0.42 [UV,  $\text{KMnO}_4$ ].  **$^1\text{H-NMR}$  (400 MHz,  $\text{CDCl}_3$ ):**  $\delta$  = 2.94 (s, 3H), 2.78 – 2.64 (m, 1H), 2.02 – 1.90 (m, 2H), 1.85 – 1.78 (m, 2H), 1.76 – 1.68 (m, 1H), 1.52 – 1.30 (m, 5H), 1.38 (s, 6H) ppm.  **$^{13}\text{C-NMR}$  (101 MHz,  $\text{CDCl}_3$ ):**  $\delta$  = 171.7, 162.6, 84.0, 37.2, 29.7, 26.0, 25.9, 25.4, 24.5 ppm. **IR (film):**  $\nu_{\max}$  [ $\text{cm}^{-1}$ ] = 2979, 2928, 2853, 1698, 1629, 1449, 1423,



1401, 1379, 1364, 1319, 1295, 1273, 1196, 1178, 1152, 1054, 1001, 979, 912, 891, 842, 716, 678, 621, 571, 557, 507. **LRMS (EI):**  $m/z$  (%) 208 (14) [ $M^+$ ], 193 (95) [( $M-CH_3$ ) $^+$ ], 165 (10), 153 (10), 125 (14), 71 (24), 56 (100). **HRMS (ESI):**  $m/z$  209.1648 [209.1648 calculated for  $C_{12}H_{21}N_2O^+$  ( $M+H^+$ )].

## Catalyst synthesis

### 2,2'-Bispyrrolidine

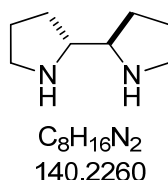

The title compound was synthesized in accordance to a procedure published by Denmark *et al.*<sup>3</sup> The obtained enantiomers were stored as the corresponding ammonium tartrate which could be isolated as white solids and liberated for further use in the synthesis of the catalysts. The characterization and the determination of the enantiomeric excess were accomplished using the benzoylated derivatives.

### [2,2'-Bispyrrolidine]-1,1'-diyl bis(phenylmethanone)

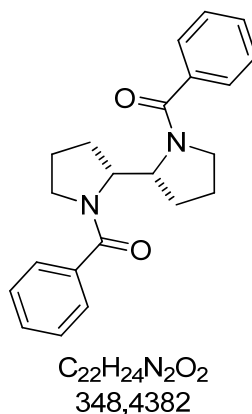

The benzoylated derivatives were synthesized in accordance to a procedure published by Denmark *et al.*<sup>3</sup> Triethylamine (0.8 M in  $CH_2Cl_2$ , 0.5 ml, 2.0 eq.) and benzoyl chloride (0.8 M in  $CH_2Cl_2$ , 0.5 ml, 2.0 eq.) were added to a solution of bispyrrolidine (28 mg, 0.20 mmol) in  $CH_2Cl_2$  (1.0 ml) at 0 °C and the reaction mixture was stirred at room temperature over night. Ethyl acetate (10 ml) and dist. water (2 ml) were added, the aqueous layer was removed and extracted with ethyl acetate. The combined organic layers were washed with  $NaHCO_3$  solution (saturated, aq., 3 ml), dried over  $MgSO_4$ , filtrated and concentrated under reduced pressure. The crude product was purified by column chromatography. (PE: Isopropanol = 6:1)

The title compound was obtained as a white solid (57 mg, 0.16 mmol, 82% for the (*R,R*)- and 49 mg, 0.14 mmol, 49% for the (*S,S*)-enantiomer).

**R<sub>f</sub> (PE:Isopropanol = 6:1):** 0.38 [UV] **<sup>1</sup>H-NMR (400 MHz, CDCl<sub>3</sub>):** δ = 7.45 – 7.38 (m, 4H), 7.34 – 7.21 (m, 6H), 4.65 – 4.58 (m, 2H), 3.80 (ddd, *J* = 10.6, 8.7, 5.1 Hz, 2H), 3.20 (ddd, *J* = 10.5, 8.0, 6.8 Hz, 2H), 2.30 – 2.16 (m, 2H), 2.08 – 1.97 (m, 2H), 1.96 – 1.85 (m, 2H), 1.83 – 1.74 (m, 2H) ppm. **<sup>13</sup>C-NMR (101 MHz, CDCl<sub>3</sub>):** δ = 171.1, 137.4, 129.7, 128.3, 127.3, 59.0, 49.3, 28.4, 24.3 ppm.

The analytical data are in agreement with the literature.<sup>3</sup>

### 2,5-Dioxopyrrolidin-1-yl picolinate

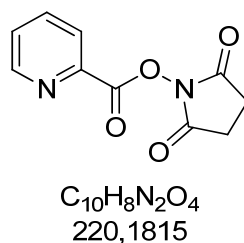

The title compound was synthesized according to a procedure published by Christensen *et al.*<sup>4</sup> Within 15 minutes triethylamine (28.333 ml, 20.683 g, 204.4 mmol, 2.8 eq.) was added to a suspension of picolinoyl chloride hydrochloride (12.995 g, 73.0 mmol) and *N*-hydroxysuccinimide (8.401 g, 73.0 mmol, 1.0 eq.) in THF (150 ml, abs.). The reaction mixture was stirred at room temperature over night before it was filtrated and rinsed with ethyl acetate. The filtrate was concentrated under reduced pressure to a volume of approximately 300 ml. Activated charcoal was added, the mixture was filtrated and concentrated under reduced pressure. The residue was recrystallised from isopropanol.

The title compound was obtained as a yellowish solid (3.319 g, 15.07 mmol, 21%).

**<sup>1</sup>H-NMR (400 MHz, CDCl<sub>3</sub>):** δ = 8.67 (d, *J* = 4.9 Hz, 1H), 8.25 (d, *J* = 7.9, 1.1 Hz, 1H), 7.98 (td, *J* = 7.7, 1.6 Hz, 1H), 7.61 (ddd, *J* = 7.7, 4.9, 1.2 Hz, 1H), 2.74 (s, 4H) ppm.

The analytical data are in agreement with the literature.<sup>4</sup>

**(2*R*,2'*R*)-[2,2'-Bipyrrolidin]-1-yl(pyridin-2-yl)methanone**

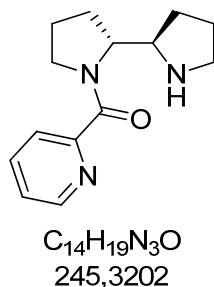

The enantiomerically pure (2*R*,2'*R*)-2,2'-bipyrrolidine (512 mg, 3.65 mmol), which was freshly liberated from the corresponding tartrate (according to the literature procedure by Denmark *et al.*)<sup>3</sup>, was dissolved in a mixture of distilled water (3.56 ml) and hydrochloric acid (1 M, 3.56 ml, 1.0 eq.). 2,5-Dioxopyrrolidin-1-yl picolinate (804 g, 3.65 mmol, 1.0 eq.) was added. A small amount of acetone was used to rinse the weighing paper. The reaction mixture was stirred at room temperature over night. The aqueous layer was extracted 3 times with CH<sub>2</sub>Cl<sub>2</sub> and the organic layer was discarded. The aqueous layer was basified with NaOH solution (aq., 10%, 20 ml) and saturated with sodium chloride. The aqueous layer was then extracted with methylene chloride. The combined organic layers were dried over MgSO<sub>4</sub>, filtrated and concentrated under reduced pressure. The crude product was used in the following step without further purification.

**General procedure for the reductive amination of the catalyst's precursor with different aldehydes**

The catalyst's precursor was weighed in, solved in methylene chlorid (10.2 M solution, abs.) and transferred to a flame-dried flask. The corresponding aldehyde (2.0 eq.) was added and the reaction mixture was stirred at room temperature for 0.5 h. Subsequently, tetramethylammonium triacetoxyborohydride (2.0 eq.) was added and the reaction mixture was stirred at room temperature over night. The solvent was removed under reduced pressure and the residue was purified by column chromatography. (PE:EtOAc 9:1 → 7:3 + 5% triethylamine)

**((2*R*,2'*R*)-1'-(2-hydroxybenzyl)-[2,2'-bipyrrolidin]-1-yl)(pyridin-2-yl)methanon  
(Catalyst E)**

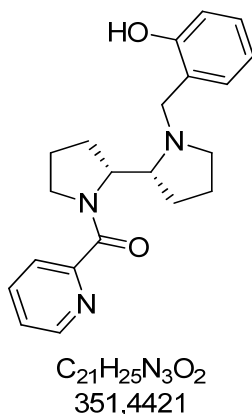

The title compound was obtained as a yellowish solid (426.4 mg, 1.21 mmol, 70% over 2 steps).

Two rotamers (ratio 8:2) were observed in the NMR-spectra.

**R<sub>f</sub> (PE:EtOAc = 7:3 + 5% Et<sub>3</sub>N):** 0.24 [UV, CAM, Ninhydrin]. **[α]<sup>20</sup><sub>D</sub>** = +173.7 (c = 1.00, MeOH). **<sup>1</sup>H-NMR (400 MHz, CDCl<sub>3</sub>):** δ = 11.10 (br s, 1H), 8.61 – 8.58 (m, 0.8H), 8.58 – 8.55 (m, 0.2H), 7.88 – 7.76 (m, 2.0H), 7.42 – 7.37 (m, 0.2H), 7.36 – 7.31 (m, 0.8H), 7.18 – 7.12 (m, 1.0H), 7.04 – 7.00 (d, *J* = 7.3 Hz, 0.8H), 6.89 – 6.85 (d, *J* = 7.3 Hz, 0.2H), 6.82 – 6.72 (m, 2.0H), 5.29 – 5.24 (m, 0.2H), 4.73 – 4.66 (m, 0.8H), 4.55 – 4.49 (d, *J* = 14.0 Hz, 0.8H), 4.15 – 4.07 (m, 0.4H), 3.78 – 3.73 (m, 1.6H), 3.70 – 3.63 (m, 0.8H), 3.54 – 3.46 (m, 1.0H), 3.12 – 3.04 (m, 0.8H), 2.98 – 2.90 (m, 0.4H), 2.48 – 2.42 (m, 0.2H), 2.32 – 2.19 (m, 1.8H), 2.08 – 1.86 (m, 3.2H), 1.85 – 1.62 (m, 4.0H) ppm. **<sup>13</sup>C-NMR (101 MHz, CDCl<sub>3</sub>, major rotamer):** δ = 167.4, 157.7, 154.6, 148.2, 136.9, 128.6, 128.3, 124.9, 124.1, 122.7, 119.2, 115.9, 63.7, 58.8, 58.2, 54.6, 51.1, 25.6, 25.4, 25.2, 23.3 ppm. **IR (film):** ν<sub>max</sub> [cm<sup>-1</sup>] = 3072, 3042, 2964, 2922, 2881, 2852, 2741, 2724, 2650, 1623, 1588, 1474, 1448, 1410, 1257, 1096, 756, 720. **LRMS (ESI):** *m/z* (%) 352 (100) [(M+H<sup>+</sup>)]. **HRMS (ESI):** *m/z* 352.2022 [352.2020 calculated for C<sub>21</sub>H<sub>26</sub>N<sub>3</sub>O<sub>2</sub><sup>+</sup> (M+H<sup>+</sup>)].

## General procedure for the asymmetric organocatalytic reduction of aromatic imidazolinones

The imidazolinone (0.1 mmol) was placed in the reaction vessel. Successively, stock solutions of the catalyst (0.4 ml, 5.0 mM in chloroform, 0.02 eq.), acetic acid (0.4 ml, 0.5 M in chloroform, 2.0 eq.) and trichlorosilane (0.2 ml, 1.25 M in chloroform, 2.5 eq.) were added. After 24 h, methylene chloride, sodium bicarbonate solution (aq., sat., 1.6 ml) and sodium hydroxide solution (aq., 10%, 1.2 ml) were added. The organic layer was removed and the aqueous layer was extracted with methylene chloride. The combined organic phases were dried over MgSO<sub>4</sub> and the solvent was removed under reduced pressure. The crude product was purified with column chromatography. (PE:EtOAc = 6:4 → 0:1).

### (*R*)-2,2,3-Trimethyl-5-phenylimidazolidin-4-on (**2a**)

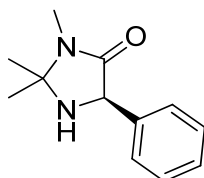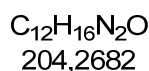

The title compound was obtained as a colourless viscous liquid (19.8 mg, 0.10 mmol, 97%, 96% *ee*).

**R<sub>f</sub> (EtOAc):** 0.26 [UV, Ninhydrin]. **R<sub>f</sub> (EtOAc:MeOH = 9:1):** 0.35 [UV, Ninhydrin]. **[α]<sup>20</sup><sub>D</sub>** = -17.9 (c = 1.00, MeOH). **<sup>1</sup>H-NMR (600 MHz, CDCl<sub>3</sub>):** δ = 7.47 – 7.43 (m, 2H), 7.37 – 7.32 (m, 2H), 7.30 – 7.26 (m, 1H), 4.63 (s, 1H), 2.84 (d, *J* = 0.9 Hz, 3H), 2.16 (br s, 1H), 1.44 (s, 3H), 1.40 (s, 3H) ppm. **<sup>13</sup>C-NMR (151 MHz, CDCl<sub>3</sub>):** δ = 172.5, 138.6, 128.7, 128.0, 127.7, 75.7, 62.2, 27.8, 25.7, 25.5 ppm. **IR (film):** ν<sub>max</sub> [cm<sup>-1</sup>] = 3324, 3062, 3030, 2975, 2930, 1681, 1603, 1493, 1475, 1449, 1422, 1395, 1366, 1326, 1304, 1280, 1205, 1182, 1148, 1095, 1064, 1029, 1005, 980, 937, 917, 858, 806, 776, 753, 729, 696, 658, 632, 611, 561, 526. **LRMS (EI):** *m/z* (%) 189 (51) [M<sup>+</sup>-CH<sub>3</sub>], 146 (19), 104 (14), 91 (14), 77 (12), 56 (100). **HRMS (ESI):** *m/z* 227.1153 [227.1155 calculated for C<sub>12</sub>H<sub>16</sub>N<sub>2</sub>NaO<sup>+</sup> (M+Na<sup>+</sup>)]. **HPLC** (Chiralpak IA; flow: 1.0 ml/min; Heptane:EtOH = 90:10; 220 nm) 96% *ee* (*R*-enantiomer *t<sub>r</sub>* = 10.66 min; *S*-enantiomer *t<sub>r</sub>* = 12.84 min).

### Procedure for the asymmetric organocatalytic reduction of **1a** on a scale of 1.0 mmol

**1a** (202.3 mg, 1.0 mmol) was placed in the reaction flask and stock solutions of the catalyst (4.0 ml, 5.0 mM in chloroform, 0.02 eq.), acetic acid (4.0 ml, 0.5 M in chloroform, 2.0 eq.), and trichlorosilane (2.0 ml, 1.25 M in chloroform, 2.5 eq.) were successively added. The reaction was stirred at room temperature for 24 h. Methylene chloride, sodium bicarbonate solution (aq., sat., 16.0 ml) and sodium hydroxide solution (aq., 10%, 12.0 ml) were added, the organic layer was removed and the aqueous layer was extracted with methylene chloride. The combined organic phases were dried over MgSO<sub>4</sub> and the solvent was removed under reduced pressure. The crude product was purified with column chromatography. (PE:EtOAc = 6:4 → 0:1).

The title compound was obtained as a colourless viscous liquid (204.4 mg, 1.00 mmol, 99%, 94% *ee*).

### (*R*)-2,2,3-Trimethyl-5-(*p*-tolyl)imidazolidin-4-on (**2b**)

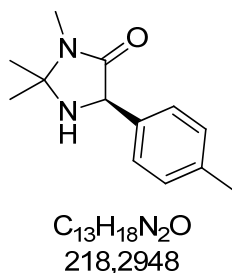

The title compound was obtained as a yellow viscous liquid (20.4 mg, 0.09 mmol, 93%, 96% *ee*).

**R<sub>f</sub> (EtOAc):** 0.33 [UV, Ninhydrin]. **[α]<sup>20</sup><sub>D</sub>** = -11.9 (c = 1.00, MeOH). **<sup>1</sup>H-NMR (600 MHz, CDCl<sub>3</sub>):** δ = 7.32 (d, *J* = 7.7 Hz, 2H), 7.17 (d, *J* = 7.7 Hz, 2H), 4.60 (s, 1H), 2.86 (s, 3H), 2.33 (s, 3H), 1.46 (s, 3H), 1.42 (s, 3H) ppm. **<sup>13</sup>C-NMR (101 MHz, CDCl<sub>3</sub>):** δ = 172.8, 137.7, 135.6, 129.4, 127.6, 75.6, 62.1, 27.8, 25.6, 25.5, 21.2 ppm. **IR (film):** ν<sub>max</sub> [cm<sup>-1</sup>] = 3324, 2973, 2924, 1684, 1512, 1421, 1394, 1366, 1275, 1205, 1182, 1147, 1096, 1022, 1005, 980, 933, 850, 808, 774, 752, 705, 654, 642, 565, 518. **LRMS (EI):** *m/z* (%) 203 (100) [(M-CH<sub>3</sub>)<sup>+</sup>], 161 (31), 160 (25), 146 (12), 120 (18), 105 (17), 91 (10), 56 (45). **HRMS:** *m/z* 241.1313 [241.1311 calculated for C<sub>13</sub>H<sub>18</sub>N<sub>2</sub>ONa<sup>+</sup> (M+Na<sup>+</sup>)]. **HPLC:** (Chiralpak IA; flow: 1.0 ml/min; Heptane:EtOH = 90:10; 220 nm) 96% *ee* (*R*-enantiomer *t<sub>r</sub>* = 11.12 min; *S*-enantiomer *t<sub>r</sub>* = 13.48 min).

**(R)-2,2,3-Trimethyl-5-(*m*-tolyl)imidazolidin-4-on (2c)**

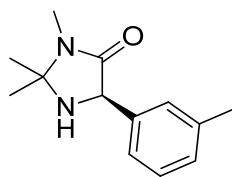

C<sub>13</sub>H<sub>18</sub>N<sub>2</sub>O  
218,2948

The title compound was obtained as a colourless viscous liquid (22.4 mg, 0.10 mmol, quant., 96% *ee*).

**R<sub>f</sub> (EtOAc):** 0.33 [UV, Ninhydrin]. **[α]<sup>20</sup><sub>D</sub>** = -18.0 (c = 1.00, MeOH). **<sup>1</sup>H-NMR (600 MHz, CDCl<sub>3</sub>):** δ = 7.25 – 7.16 (m, 4H), 4.59 (s, 1H), 2.86 (s, 3H), 2.35 (s, 3H), 1.47 (s, 3H), 1.41 (s, 3H) ppm. **<sup>13</sup>C-NMR (101 MHz, CDCl<sub>3</sub>):** δ = 172.8, 138.4, 138.4, 128.8, 128.7, 128.4, 124.8, 75.7, 62.4, 27.7, 25.6, 25.6, 21.5 ppm. **IR (film):** ν<sub>max</sub> [cm<sup>-1</sup>] = 3324, 2974, 2924, 2856, 1685, 1608, 1422, 1395, 1366, 1328, 1278, 1253, 1206, 1148, 1096, 1002, 980, 938, 810, 749, 696, 663, 636, 618, 574, 539, 507, 437. **LRMS (EI):** *m/z* (%) 203 (97) [(M- CH<sub>3</sub>)<sup>+</sup>], 161 (26), 160 (25), 146 (14), 120 (18), 105 (17), 91 (18), 56 (100). **HRMS:** *m/z* 241.1307 [241.1311 calculated for C<sub>13</sub>H<sub>18</sub>N<sub>2</sub>ONa<sup>+</sup> (M+Na<sup>+</sup>)]. **HPLC:** (Chiralpak IA; flow: 1.0 ml/min; Heptane:EtOH = 90:10; 220 nm) 96% *ee* (*R*-enantiomer *t<sub>r</sub>* = 9.89 min; *S*-enantiomer *t<sub>r</sub>* = 12.54 min).

**(R)-2,2,3-Trimethyl-5-(*o*-tolyl)imidazolidin-4-on (2d)**

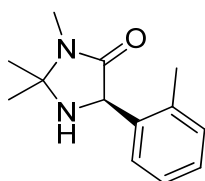

C<sub>13</sub>H<sub>18</sub>N<sub>2</sub>O  
218,2948

The reaction was carried out at a longer reaction time of 48 h.

The title compound was obtained as a colourless viscous liquid (9.6 mg, 0.04 mmol, 44%, 64% *ee*).

**R<sub>f</sub> (EtOAc):** 0.30 [UV, Ninhydrin]. **[α]<sup>20</sup><sub>D</sub>** = +35.7 (c = 0.08, MeOH). **<sup>1</sup>H-NMR (400 MHz, CDCl<sub>3</sub>):** δ = 7.25 – 7.17 (m, 4H), 4.82 (s, 1H), 2.90 (d, *J* = 0.6 Hz, 3H), 2.45 (s, 3H), 1.48 (s, 3H), 1.41 (s, 3H) ppm. **<sup>13</sup>C-NMR (101 MHz, CDCl<sub>3</sub>):** δ = 173.3, 137.6, 136.7, 130.8, 128.2, 127.6, 126.6, 75.7, 60.0, 27.6, 25.6, 25.3, 19.4 ppm. **IR (film):** ν<sub>max</sub> [cm<sup>-1</sup>] = 3324, 2971, 2924, 2853, 1685, 1605, 1463, 1422, 1395, 1367, 1278, 1254, 1208, 1181, 1149, 1095, 1072, 1050, 1006, 980, 936, 859, 806, 746, 725, 659, 632, 614, 576, 560, 501, 447. **LRMS (EI):** *m/z* (%) 203 (34) [(M- CH<sub>3</sub>)<sup>+</sup>], 160 (61), 146 (22), 118 (17), 104 (21), 91 (19), 56 (100). **HRMS:** *m/z* 241.1314 [241.1311 calculated for C<sub>13</sub>H<sub>18</sub>N<sub>2</sub>ONa<sup>+</sup> (M+Na<sup>+</sup>)]. **HPLC:** (Chiralpak IA; flow: 1.0 ml/min; Heptane:EtOH = 90:10; 220 nm) 64% *ee* (*R*-Enantiomer *t<sub>r</sub>* = 8.31 min; *S*-Enantiomer *t<sub>r</sub>* = 8.85 min).

**(*R*)-5-(4-Chlorophenyl)-2,2,3-trimethylimidazolidin-4-on (2e)**

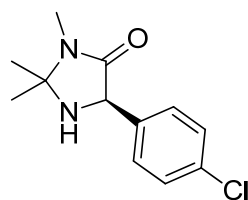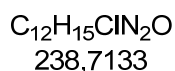

The title compound was obtained as a yellow viscous liquid (22.8 mg, 0.10 mmol, 96%, 94% *ee*).

**R<sub>f</sub> (EtOAc):** 0.28 [UV, Ninhydrin]. **[α]<sup>20</sup><sub>D</sub>** = -36.8 (c = 0.72, MeOH). **<sup>1</sup>H-NMR (400 MHz, CDCl<sub>3</sub>):** δ = 7.47 – 7.42 (m, 2H), 7.34 – 7.29 (m, 2H), 4.64 (s, 1H), 2.84 (d, *J* = 0.7 Hz, 3H), 1.43 (s, 3H), 1.43 (s, 3H) ppm. **<sup>13</sup>C-NMR (101 MHz, CDCl<sub>3</sub>):** δ = 171.9, 137.2, 133.8, 128.9, 128.8, 75.8, 61.3, 28.0, 26.0, 25.5 ppm. **IR (film):** ν<sub>max</sub> [cm<sup>-1</sup>] = 3324, 2973, 2926, 1680, 1596, 1488, 1422, 1396, 1367, 1334, 1290, 1271, 1251, 1206, 1182, 1148, 1086, 1014, 981, 933, 911, 848, 821, 799, 772, 696, 651, 634, 568, 546, 497, 455. **LRMS (EI):** *m/z* (%) 223 (50) [(M- CH<sub>3</sub>)<sup>+</sup>], 181 (20), 138 (11), 125 (11), 89 (10), 56 (100). **HRMS (ESI):** *m/z* 267.0768 [267.0765 calculated for C<sub>12</sub>H<sub>15</sub>ClN<sub>2</sub>ONa<sup>+</sup> (M+Na<sup>+</sup>)]. **HPLC:** (Chiralpak IA; flow: 1.0 ml/min; Heptane:EtOH = 90:10; 220 nm) 94% *ee* (*R*-enantiomer *t<sub>r</sub>* = 11.02 min; *S*-enantiomer *t<sub>r</sub>* = 15.41 min).



**(R)-5-(4-Fluorophenyl)-2,2,3-trimethylimidazolidin-4-on (2f)**

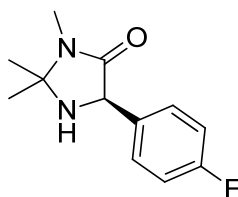

C<sub>12</sub>H<sub>15</sub>FN<sub>2</sub>O  
222,2587

The title compound was obtained as a colourless viscous liquid (21.5 mg, 0.10 mmol, 97%, 96% *ee*).

**R<sub>f</sub> (EtOAc):** 0.27 [UV, Ninhydrin]. **[α]<sup>20</sup><sub>D</sub>** = -23.9 (c = 1.00, MeOH). **<sup>1</sup>H-NMR (400 MHz, CDCl<sub>3</sub>):** δ = 7.49 – 7.43 (m, 2H), 7.08 – 7.00 (m, 2H), 4.64 (s, 1H), 2.85 (d, *J* = 0.6 Hz, 3H), 1.44 (s, 3H), 1.43 (s, 3H) ppm. **<sup>13</sup>C-NMR (101 MHz, CDCl<sub>3</sub>):** δ = 172.19, 162.52 (d, *J* = 246.0 Hz), 134.43 (d, *J* = 3.2 Hz), 129.26 (d, *J* = 8.1 Hz), 115.47 (d, *J* = 21.6 Hz), 75.66, 61.30, 27.94, 25.78, 25.50 ppm. **IR (film):** ν<sub>max</sub> [cm<sup>-1</sup>] = 3324, 2975, 2927, 1682, 1604, 1506, 1475, 1423, 1396, 1367, 1331, 1279, 1217, 1182, 1152, 1096, 1079, 1015, 980, 933, 835, 787, 701, 656, 637, 599, 565, 522. **LRMS (EI):** *m/z* (%) 207 (60) [(M- CH<sub>3</sub>)<sup>+</sup>], 165 (21), 122 (23), 109 (21), 56 (100). **HRMS (ESI):** *m/z* 245.1057 [245.1061 calculated for C<sub>12</sub>H<sub>15</sub>FN<sub>2</sub>ONa<sup>+</sup> (M+Na<sup>+</sup>)]. **HPLC:** (Chiralpak IA; flow: 1.0 ml/min; Heptane:EtOH = 90:10; 220 nm) 96% *ee* (*R*-enantiomer *t<sub>r</sub>* = 9.95 min; *S*-enantiomer *t<sub>r</sub>* = 13.59 min).

**(R)-5-(4-Methoxyphenyl)-2,2,3-trimethylimidazolidin-4-on (2g)**

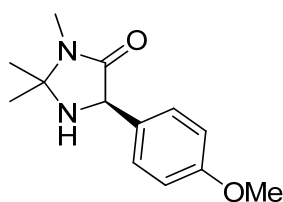

C<sub>13</sub>H<sub>18</sub>N<sub>2</sub>O<sub>2</sub>  
234,2942

The reaction was carried out at an elevated temperature of 45 °C.

The title compound was obtained as a colourless viscous liquid (20.1 mg, 0.09 mmol, 86%, 95% *ee*).

**R<sub>f</sub> (EtOAc):** 0.25 [UV, Ninhydrin]. **[α]<sup>20</sup><sub>D</sub>** = -9.0 (c = 0.74, MeOH). **<sup>1</sup>H-NMR (600 MHz, CDCl<sub>3</sub>):** δ = 7.37 – 7.33 (m, 2H), 6.91 – 6.87 (m, 2H), 4.61 (s, 1H), 3.79 (s, 3H), 2.86 (d, *J* =

0.7 Hz, 3H), 1.46 (s, 3H), 1.42 (s, 3H) ppm. **<sup>13</sup>C-NMR (151 MHz, CDCl<sub>3</sub>):** δ = 173.0, 159.6, 130.6, 129.0, 114.3, 75.6, 61.9, 55.4, 29.8, 27.8, 25.6 ppm. **IR (film):** ν<sub>max</sub> [cm<sup>-1</sup>] = 3320, 2971, 2927, 2837, 1683, 1611, 1585, 1510, 1462, 1421, 1395, 1366, 1288, 1243, 1207, 1177, 1148, 1095, 1030, 980, 933, 907, 828, 810, 785, 709, 656, 639, 587, 567, 534. **LRMS (EI):** *m/z* (%) 234 (6) [M<sup>+</sup>], 219 (40) [(M-CH<sub>3</sub>)<sup>+</sup>], 177 (24), 136 (20), 121 (25), 77 (10), 56 (100). **HRMS (ESI):** *m/z* 235.1440 [235.1441 calculated for C<sub>13</sub>H<sub>19</sub>N<sub>2</sub>O<sub>2</sub><sup>+</sup> (M+H<sup>+</sup>)]. **HPLC:** (Chiralpak IA; flow: 1.0 ml/min; Heptane:EtOH = 90:10; 220 nm) 95% *ee* (*R*-enantiomer *t<sub>r</sub>* = 22.32 min; *S*-enantiomer *t<sub>r</sub>* = 26.66 min).

**(*R*)-4-(1,2,2-Trimethyl-5-oxoimidazolidin-4-yl)benzonitril (2h)**

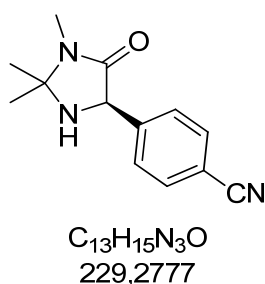

The title compound was obtained as a colourless viscous liquid (22.5 mg, 0.10 mmol, 98%, 90% *ee*).

**R<sub>f</sub> (EtOAc):** 0.31 [UV, Ninhydrin]. [α]<sup>20</sup><sub>D</sub> = -45.5 (c = 1.00, MeOH). **<sup>1</sup>H-NMR (400 MHz, CDCl<sub>3</sub>):** δ = 7.74 – 7.70 (m, 2H), 7.66 – 7.62 (m, 2H), 4.77 (s, 1H), 2.83 (d, *J* = 0.6 Hz, 3H), 1.48 (s, 3H), 1.42 (s, 3H) ppm. **<sup>13</sup>C-NMR (151 MHz, CDCl<sub>3</sub>):** δ = 170.7, 144.4, 132.2, 128.0, 119.0, 111.6, 76.0, 61.0, 28.3, 26.4, 25.5 ppm. **IR (film):** ν<sub>max</sub> [cm<sup>-1</sup>] = 3336, 2976, 2929, 2227, 1684, 1608, 1501, 1475, 1424, 1398, 1367, 1338, 1278, 1208, 1183, 1148, 1097, 1020, 980, 935, 855, 831, 748, 708, 665, 645, 592, 552, 501. **LRMS (EI):** *m/z* (%) 214 (55) [(M-CH<sub>3</sub>)<sup>+</sup>], 172 (20), 129 (9), 116 (10), 56 (100). **HRMS (ESI):** *m/z* 230.1292 [230.1288 calculated for C<sub>13</sub>H<sub>16</sub>CIN<sub>3</sub>O<sup>+</sup> (M+H<sup>+</sup>)]. **HPLC:** (Chiralpak IA; flow: 0.8 ml/min; Heptane:EtOH = 80:20; 220 nm) 90% *ee* (*R*-enantiomer *t<sub>r</sub>* = 11.84 min; *S*-enantiomer *t<sub>r</sub>* = 16.43 min).

**(R)-5-(4-(Dimethylamino)phenyl)-2,2,3-trimethylimidazolidin-4-on (2i)**

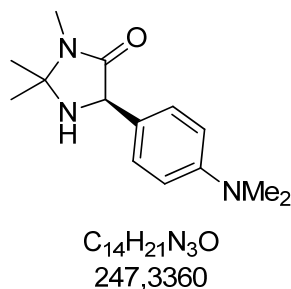

The reaction was carried out at an elevated temperature of 45 °C and with 10 mol% of catalyst.

The title compound was obtained as a yellow viscous liquid (14.3 mg, 0.06 mmol, 58%, 86% *ee*).

**R<sub>f</sub> (EtOAc:MeOH = 95:5):** 0.23 [Ninhydrin]. **[α]<sup>20</sup><sub>D</sub>** = -13.8 (c = 0.50, MeOH). **<sup>1</sup>H-NMR (400 MHz, CDCl<sub>3</sub>):** δ = 7.27 – 7.21 (m, 2H), 6.74 – 6.67 (m, 2H), 4.53 (s, 1H), 2.93 (s, 6H), 2.86 (s, 3H), 1.46 (s, 3H), 1.39 (s, 3H) ppm. **<sup>13</sup>C-NMR (101 MHz, CDCl<sub>3</sub>):** δ = 173.6, 150.6, 128.7, 126.2, 113.0, 75.4, 62.2, 40.7, 27.71, 25.7, 25.5 ppm. **IR (film):** ν<sub>max</sub> [cm<sup>-1</sup>] = 3324, 2972, 2923, 2800, 1684, 1614, 1567, 1520, 1476, 1444, 1420, 1393, 1347, 1284, 1211, 1188, 1164, 1147, 1095, 1062, 1008, 980, 946, 906, 864, 811, 778, 725, 655, 640, 613, 566, 530. **LRMS (EI):** *m/z* (%) 247 (50) [M<sup>+</sup>], 232 (13) [(M- CH<sub>3</sub>)<sup>+</sup>], 190 (50), 175 (13), 148 (100), 134 (74), 116 (18), 95 (12), 72 (22), 56 (88). **HRMS (ESI):** *m/z* 248.1758 [248.1757 calculated for C<sub>14</sub>H<sub>22</sub>N<sub>3</sub>O<sup>+</sup> (M+H<sup>+</sup>)]. **HPLC:** (Chiralpak IA; flow: 1.0 ml/min; Heptane:<sup>i</sup>PrOH = 80:20; 220 nm) 86%*ee* (*R*-enantiomer *t<sub>r</sub>* = 9.77 min; *S*-enantiomer *t<sub>r</sub>* = 13.62 min).

**General Procedure for the asymmetric organocatalytic reduction of aliphatic imidazolinones**

The imidazolinone (0.1 mmol) was placed in the reaction vessel and solved in chloroform (9.0 ml). Successively, stock solutions of the catalyst (0.4 ml, 25.0 mM in chloroform, 0.10 eq.), additive (0.4 ml, 0.5 M in chloroform, 2.0 eq.) and trichlorosilane (0.2 ml, 1.25 M in chloroform, 2.5 eq.) were added. After 24 h, methylene chloride, sodium bicarbonate solution (aq., sat., 1.6 ml) and sodium hydroxide solution (aq., 10%, 1.2 ml) were added. The organic layer was removed and the aqueous layer was extracted twice with methylene chloride. The combined organic phases were dried over MgSO<sub>4</sub> and the solvent was removed under reduced pressure. The crude product was purified with column chromatography. (PE:EtOAc 6:4 → 0:1 → EtOAc:MeOH 9:1).

**(R)-5-Hexyl-2,2,3-trimethylimidazolidin-4-one (2j)**

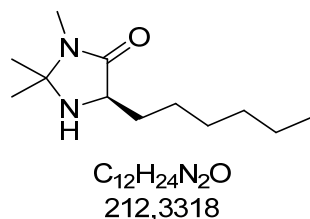

The title compound was obtained as a colourless viscous liquid (21.3 mg, 0.10 mmol, quant., 96% *ee*).

**R<sub>f</sub> (EtOAc:MeOH = 95:5):** 0.32 [Ninhydrin]. **[α]<sup>20</sup><sub>D</sub>** = +10.1 (c = 1.00, MeOH). **<sup>1</sup>H-NMR (400 MHz, CDCl<sub>3</sub>):** δ = 3.47 (dd, *J* = 7.8, 3.8 Hz, 1H), 2.79 (s, 3H), 1.96 (ddt, *J* = 10.4, 8.1, 4.2 Hz, 1H), 1.52 – 1.39 (m, 3H), 1.42 (s, 3H), 1.39 – 1.24 (m, 7H), 1.31 (s, 3H), 0.93 – 0.85 (m, 3H) ppm. **<sup>13</sup>C-NMR (151 MHz, CDCl<sub>3</sub>):** δ = 174.7, 75.6, 58.6, 32.6, 31.8, 29.3, 27.6, 26.2, 25.3, 25.1, 22.7, 14.2 ppm. **IR (film):** ν<sub>max</sub> [cm<sup>-1</sup>] = 3325, 2955, 2925, 2856, 1682, 1423, 1396, 1366, 1266, 1205, 1150, 1079, 1043, 1000, 971, 885, 819, 767, 725, 662, 618, 587, 552, 505. **LRMS (ESI):** *m/z* (%) 213 (100) [(M+H<sup>+</sup>)]. **HRMS (ESI):** *m/z* 213.1965 [213.1961 calculated for C<sub>12</sub>H<sub>25</sub>N<sub>2</sub>O<sup>+</sup> (M+H<sup>+</sup>)]. **HPLC:** (Chiralpak IA; flow: 1.0 ml/min; Heptane:EtOH = 95:5; 220 nm) 93% *ee* (*R*-enantiomer *t<sub>r</sub>* = 9.50 min; *S*-enantiomer *t<sub>r</sub>* = 10.65 min).

**(R)-5-Isobutyl-2,2,3-trimethylimidazolidin-4-one (2k)**

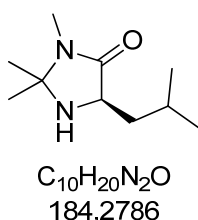

The title compound was obtained as a yellowish viscous liquid (19.7 mg, 0.10 mmol, quant., 93% *ee*).

**R<sub>f</sub> (EtOAc:MeOH = 95:5):** 0.30 [Ninhydrin]. **[α]<sup>20</sup><sub>D</sub>** = +9.3 (c = 1.00, MeOH). **<sup>1</sup>H-NMR (400 MHz, CDCl<sub>3</sub>):** δ = 3.48 (dd, *J* = 9.9, 3.2 Hz, 1H), 2.78 (s, 3H), 1.90 – 1.76 (m, 2H), 1.41 (s, 3H), 1.30 (s, 3H), 0.96 (dd, *J* = 8.1, 6.2 Hz, 6H), 0.91 – 0.77 (m, 1H) ppm. **<sup>13</sup>C-NMR (151 MHz, CDCl<sub>3</sub>):** δ = 175.2, 75.7, 56.8, 42.0, 27.6, 25.5, 25.4, 24.9, 23.5, 21.7 ppm. **IR (film):** ν<sub>max</sub> [cm<sup>-1</sup>] = 3325, 2955, 2928, 2869, 1681, 1468, 1423, 1396, 1366, 1307, 1267, 1205, 1151, 1079, 1008, 979, 930, 889, 801, 750, 666, 620, 587, 552, 505. **LRMS (EI):** *m/z* (%) 169 (75) [(M- CH<sub>3</sub>)<sup>+</sup>], 127 (8), 84 (12), 72 (9), 56 (100). **HRMS (ESI):** *m/z* 185.1649 [185.1648

calculated for  $C_{10}H_{21}N_2O^+$  ( $M+H^+$ )]. **HPLC:** (Chiralpak IA; flow: 1.0 ml/min; Heptane:EtOH = 95:5; 220 nm) 93% *ee* (*R*-Enantiomer  $t_r$  = 9.36 min; *S*-Enantiomer  $t_r$  = 10.84 min).

**(*R*)-5-Benzyl-2,2,3-trimethylimidazolidin-4-on (2l)**

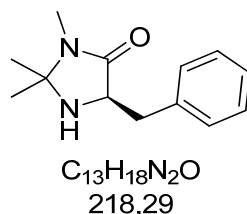

The title compound was obtained as a colourless viscous liquid (22.2 mg, 0.10 mmol, quant., 84% *ee*).

**R<sub>f</sub>** (EtOAc:MeOH = 95:5): 0.32 [Ninhydrin].  $[\alpha]^{20}_D = +69.3$  ( $c = 0.50$ , MeOH). **<sup>1</sup>H-NMR** (400 MHz, CDCl<sub>3</sub>):  $\delta = 7.32 - 7.26$  (m, 2H), 7.24 – 7.19 (m, 3H), 3.81 – 3.76 (m, 1H), 3.14 (dd,  $J = 14.2, 4.4$  Hz, 1H), 3.00 (dd,  $J = 14.2, 6.9$  Hz, 1H), 2.75 (d,  $J = 0.6$  Hz, 3H), 1.25 (s, 3H), 1.15 (s, 3H). ppm. **HPLC:** (Chiralpak IA; flow: 1.0 ml/min; Heptane:EtOH = 95:5; 220 nm) 84% *ee* (*R*-Enantiomer  $t_r$  = 13.65 min; *S*-Enantiomer  $t_r$  = 13.05 min).

The analytical data are in agreement with the literature.<sup>5</sup>

**(*R*)-5-Isopropyl-2,2,3-trimethylimidazolidin-4-one (2m)**

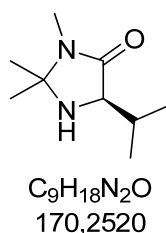

The title compound was obtained as a yellowish viscous liquid (12.4 mg, 0.07 mmol, 73%, 96% *ee*).

**R<sub>f</sub>** (EtOAc:MeOH = 95:5): 0.29 [Ninhydrin].  $[\alpha]^{20}_D = +27.2$  ( $c = 0.23$ , MeOH). **<sup>1</sup>H-NMR** (400 MHz, CDCl<sub>3</sub>):  $\delta = 3.46 - 3.42$  (m, 1H), 2.76 (d,  $J = 0.7$  Hz, 3H), 2.17 (pd,  $J = 6.9, 4.0$  Hz, 1H), 1.39 (s, 3H), 1.29 (s, 3H), 1.03 (d,  $J = 7.0$  Hz, 3H), 0.88 (d,  $J = 6.8$  Hz, 3H) ppm. **<sup>13</sup>C-NMR** (101 MHz, CDCl<sub>3</sub>):  $\delta = 173.7, 75.2, 63.4, 29.1, 27.6, 25.5, 25.1, 19.5, 16.9$  ppm. **IR (film):**  $\nu_{max}$  [cm<sup>-1</sup>] = 3337, 2965, 2932, 2872, 1676, 1468, 1425, 1398, 1383, 1366, 1281, 1261, 1203, 1179, 1154, 1045, 766, 653, 612, 559, 513. **LRMS (EI):**  $m/z$  (%) 155 (57) [ $M^+ - CH_3$ ], 127 (20), 113 (13), 98 (10), 72 (12), 56 (100). **HRMS (ESI):**  $m/z$  171.1487 [171.1492

calculated for  $C_9H_{19}N_2O^+$  ( $M+H^+$ )]. **HPLC:** (Chiralpak IA; flow: 1.0 ml/min; Heptane:EtOH = 95:5; 220 nm) 96% *ee* (*R*-enantiomer  $t_r$  = 8.54 min; *S*-enantiomer  $t_r$  = 13.55 min).

### (*R*)-5-Cyclohexyl-2,2,3-trimethylimidazolidin-4-one (2n)

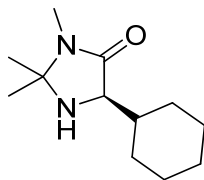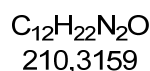

The title compound was obtained as a yellowish viscous liquid (20.2 mg, 0.10 mmol, 96%, 96% *ee*).

**R<sub>f</sub>** (EtOAc:MeOH = 95:5): 0.32 [Ninhydrin].  $[\alpha]^{20}_D = +12.0$  ( $c = 1.00$ , MeOH). **<sup>1</sup>H-NMR** (400 MHz, CDCl<sub>3</sub>):  $\delta = 3.42$  (d,  $J = 3.8$  Hz, 1H), 2.76 (s, 3H), 1.84 – 1.70 (m, 5H), 1.69 – 1.63 (m, 1H), 1.55 – 1.48 (m,  $J = 12.8$  Hz, 1H), 1.38 (s, 3H), 1.29 (s, 3H), 1.26 – 1.08 (m, 4H). **<sup>13</sup>C-NMR** (101 MHz, CDCl<sub>3</sub>):  $\delta = 173.7, 75.3, 63.0, 39.1, 30.2, 27.6, 27.3, 26.6, 26.4, 26.2, 25.5, 25.2$  ppm. **IR (film):**  $\nu_{max}$  [cm<sup>-1</sup>] = 3337, 2971, 2922, 2851, 1679, 1448, 1423, 1396, 1364, 1320, 1263, 1204, 1181, 1152, 1099, 1074, 1008, 982, 892, 813, 792, 754, 676, 643, 587, 558, 534, 496. **LRMS (ESI):**  $m/z$  (%) 211 (100) [( $M+H^+$ )]. **HRMS (ESI):**  $m/z$  211.1806 [211.1805 calculated for  $C_{12}H_{23}N_2O^+$  ( $M+H^+$ )]. **HPLC:** (Chiralpak IA; flow: 1.0 ml/min; Heptane:EtOH = 95:5; 220 nm) 96% *ee* (*R*-enantiomer  $t_r$  = 9.84 min; *S*-enantiomer  $t_r$  = 13.22 min).

## Synthesis of amino acid derivatives

### Liberation of D-phenylglycine methyl amide (5)

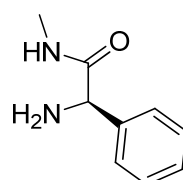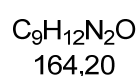

**2a** (53.1 mg, 0.26 mmol, 94% *ee*) was dissolved in toluene (0.76 ml). Acetic acid (1.0 ml) and hydrochloric acid (1 M, 4.0 ml) were added, and the resulting mixture was stirred under

microwave radiation at 100 °C for 1 h. The reaction mixture was cooled to 0 °C and, under continuous stirring, methylene chloride and NaOH (1.5 g, in small portions) were added. The aqueous phase was extracted with methylene chloride. The combined organic phases were dried over MgSO<sub>4</sub>, filtrated, and the solvent was removed under reduced pressure. The crude product was purified with column chromatography. (PE:EtOAc 1:1 → 0:1 → EtOAc:MeOH 9:1). The determination of the enantiomeric excess was accomplished after derivatisation according to literature.<sup>6</sup>

The title compound was obtained as a yellowish viscous liquid (27.4 mg, 0.17 mmol, 64%, 93% *ee*).

**R<sub>f</sub> (EtOAc:MeOH = 9:1):** 0.20 [UV, Ninhydrin]. **<sup>1</sup>H-NMR (400 MHz, CDCl<sub>3</sub>):** δ = 7.40 – 7.27 (m, 5H), 7.05 (br s, 1H), 4.52 (s, 1H), 2.80 (d, *J* = 5.0 Hz, 3H), 2.20 (br s, 2H) ppm. **<sup>13</sup>C-NMR (101 MHz, CDCl<sub>3</sub>):** δ = 173.6, 141.1, 128.9, 128.1, 127.0, 59.9, 26.2 ppm. **HPLC:** (Kromasil RP 18; flow: 0.6 ml/min; ACN:TFA (0.1%, aq.) = 50:50 → 80:20 (60 min); 254 nm) 93% *ee* (*R*-enantiomer *t<sub>r</sub>* = 24.11 min; *S*-enantiomer *t<sub>r</sub>* = 27.84 min).

The analytical data are in agreement with the literature.<sup>7</sup>

#### Liberation of D-valine (4)

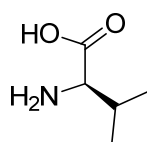

C<sub>5</sub>H<sub>11</sub>NO<sub>2</sub>  
117,08

**2m** (350.4 mg, 2.0 mmol, >99% *ee*) was dissolved in toluene (4.5 ml). Acetic acid (7.2 ml) and hydrochloric acid (conc., 28.6 ml) were added, and the resulting mixture was stirred at 105 °C for 42 h. The reaction mixture was cooled to room temperature and the crude product was purified with an ion exchange resin (DOWEX<sup>®</sup> 50W8-100) which was filled in a column. The acidic reaction mixture was poured onto the resin and it was flushed with water (dist.), ethanol, and again with water until an almost neutral pH-value could be measured. Afterwards, the column was flushed with ammonia solution (aq., 10%) until thin layer chromatography showed no positive result to staining with ninhydrin. The determination of the enantiomeric excess was accomplished after derivatisation according to literature.<sup>6</sup>

The title compound was obtained as a white solid (149.5 mg, 1.28 mmol, 64%, 99% *ee*).

**<sup>1</sup>H-NMR (400 MHz, D<sub>2</sub>O):**  $\delta$  = 3.62 (d,  $J$  = 2.2 Hz, 1H), 2.33 – 2.25 (m, 1H), 1.06 (d,  $J$  = 6.9 Hz, 3H), 1.01 (d,  $J$  = 6.8 Hz, 3H) ppm. **HPLC:** (Kromasil RP 18; flow: 0.6 ml/min; ACN:TFA (0.1%, aq.) = 50:50  $\rightarrow$  80:20 (60 min); 254 nm) 99% *ee* (*R*-enantiomer  $t_r$  = 22.27 min; *S*-enantiomer  $t_r$  = 35.31 min).

The analytical data are in agreement with the literature.<sup>8</sup>

## References

- (1) H. Zhao, R. Wang, P. Chen, B. T. Gregg, M. M. Hsia, W. Zhang, *Org. Lett.* **2012**, *14*, 1872–1875.
- (2) M. Thiverny, D. Farran, C. Philouze, V. Blandin, P. Y. Chavant, *Tetrahedron: Asymmetry* **2011**, *22*, 1274–1281.
- (3) S. E. Denmark, J. Fu, M. J. Lawler, *Org. Synth.* **2006**, *83*, 121–130.
- (4) J. B. Christensen, *Molecules* **2001**, *6*, 47–51.
- (5) M. C. Holland, J. B. Metternich, C. Daniliuc, W. B. Schweizer, R. Gilmour, *Chem. Eur. J.* **2015**, *21*, 10031–10038.
- (6) A. F. Kotthaus, H.-J. Altenbach, *Amino acids* **2011**, *40*, 527–532.
- (7) G. A. Reichard, C. Stengone, S. Paliwal, I. Mergelsberg, S. Majmundar, C. Wang, R. Tiberi, A. T. McPhail, J. J. Piwinski, N.-Y. Shih, *Org. Lett.* **2003**, *5*, 4249–4251.
- (8) C. Ramachandra Raja, A. Antony Joseph, *Spectrochimica Acta Part A* **2009**, *74*, 825–828.



# Copies of $^1\text{H}$ and $^{13}\text{C}$ NMR Spectra and HPLC Chromatograms

## 1,2,2-Trimethyl-5-oxo-4-phenyl-2,5-dihydro-1*H*-imidazole 3-oxide

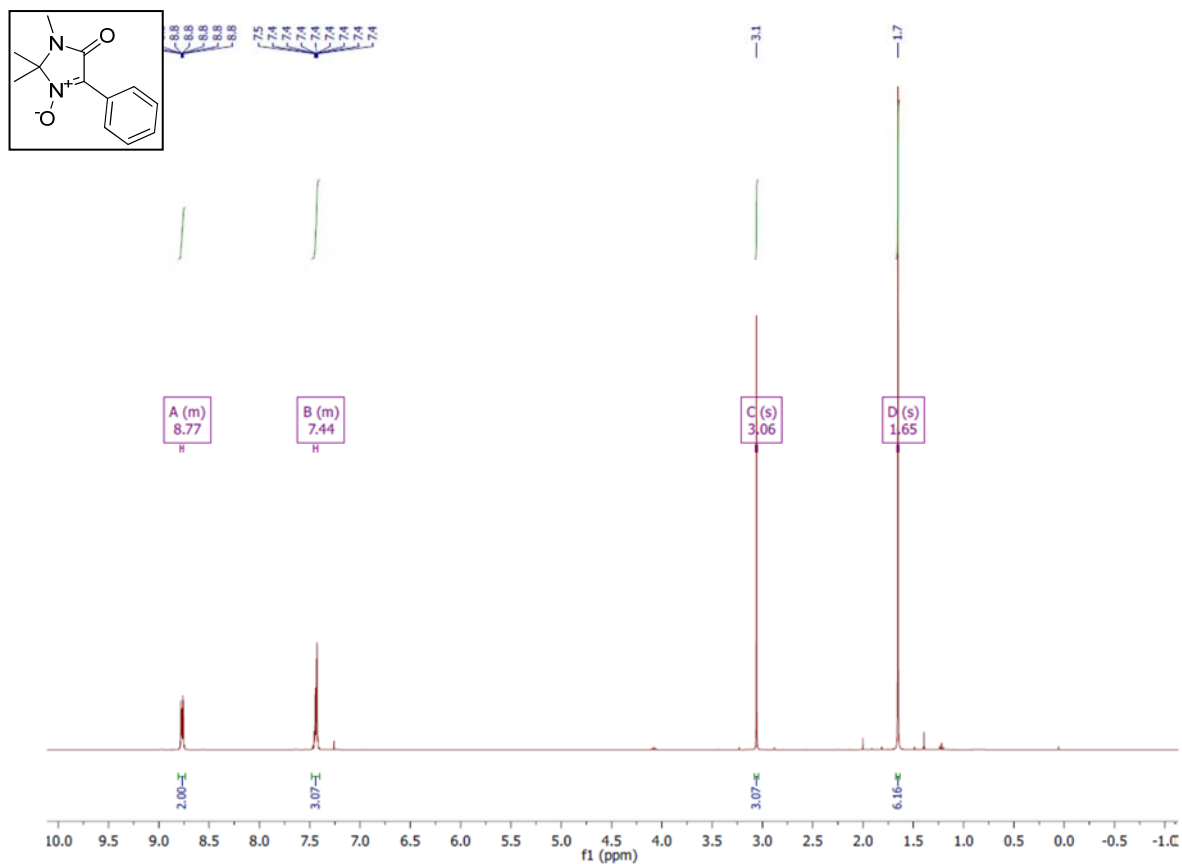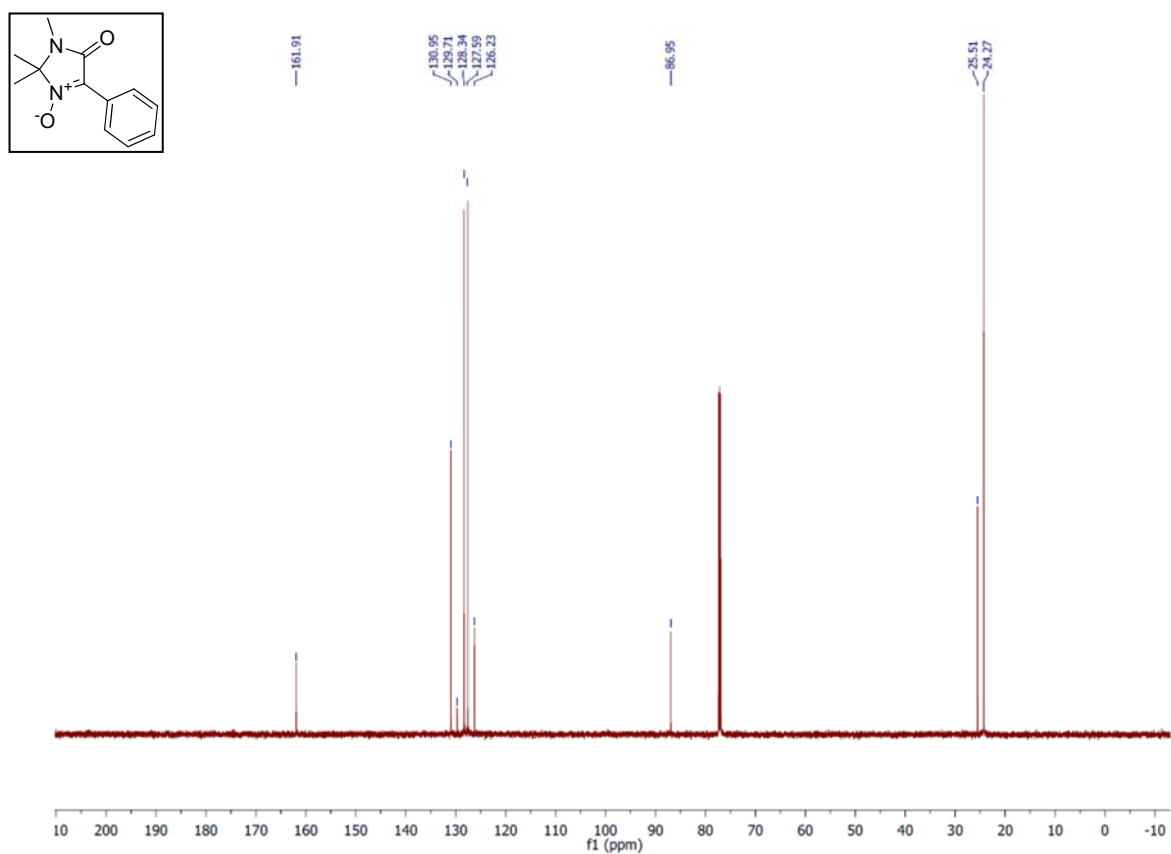

# 1,2,2-Trimethyl-5-oxo-4-(*p*-tolyl)-2,5-dihydro-1*H*-imidazole 3-oxide

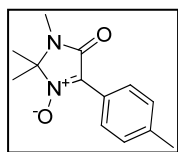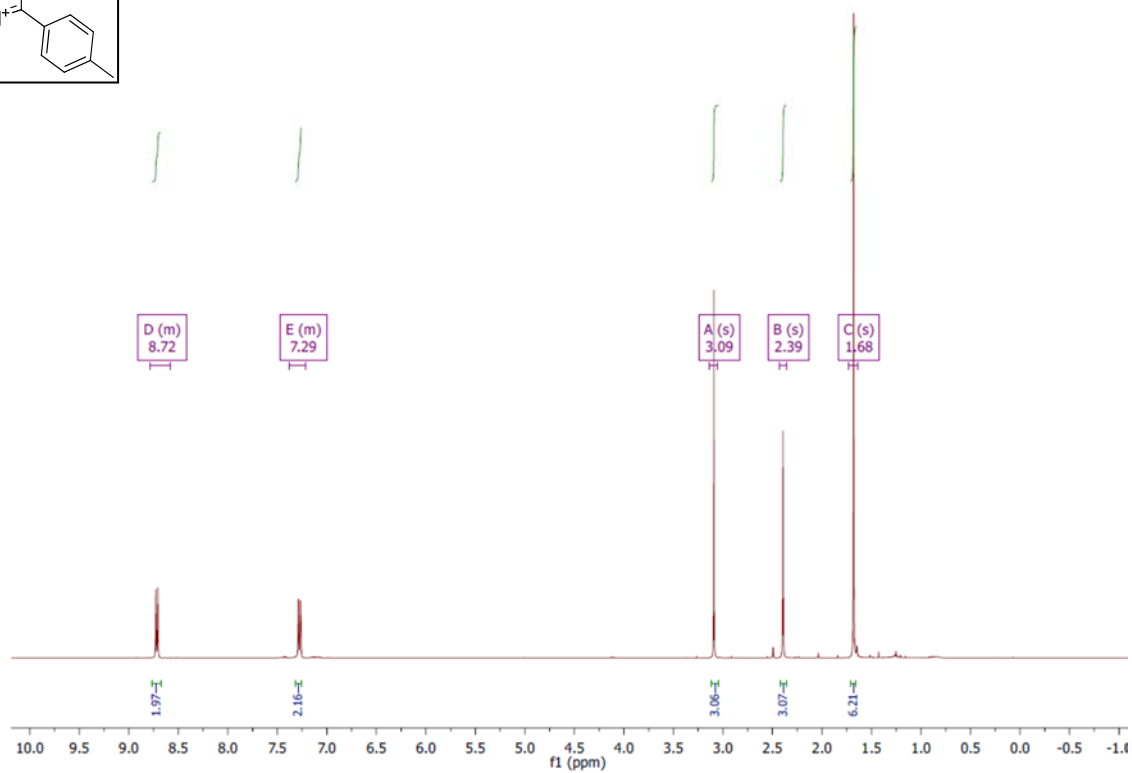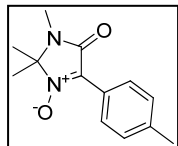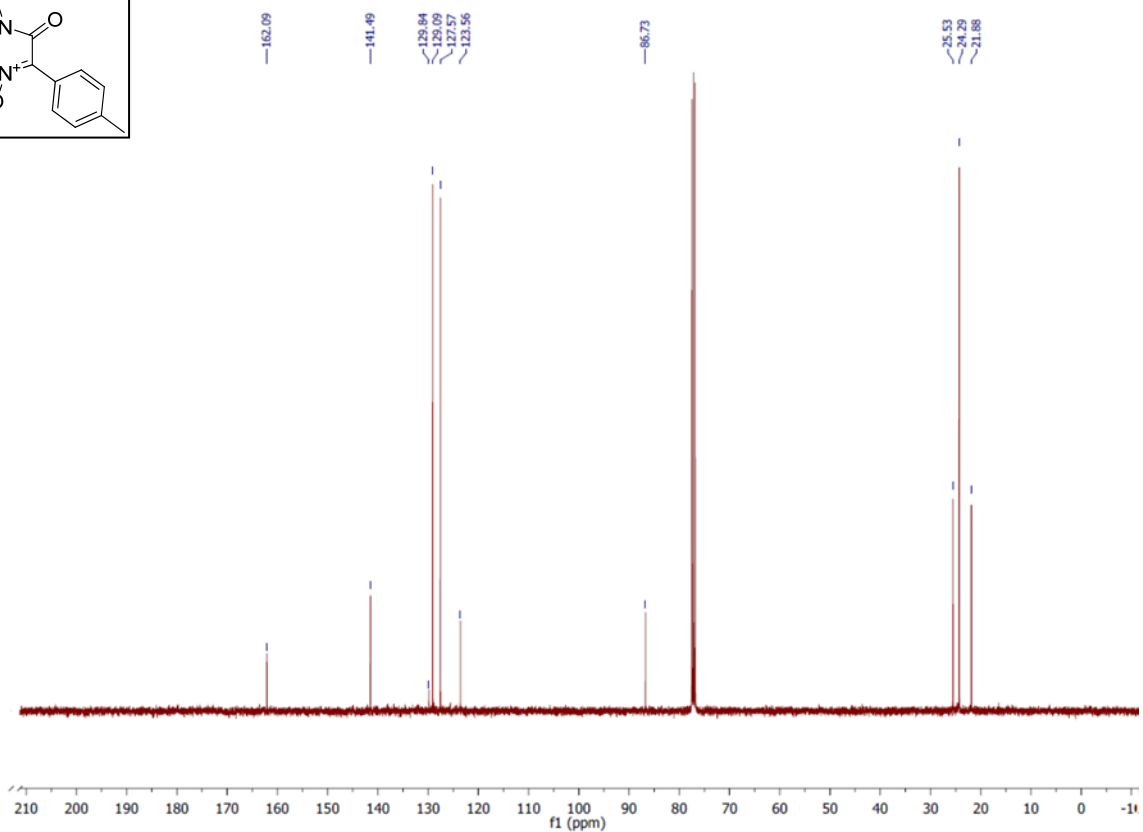

# 1,2,2-Trimethyl-5-oxo-4-(*m*-tolyl)-2,5-dihydro-1*H*-imidazole 3-oxide

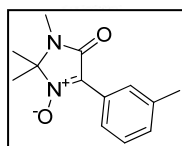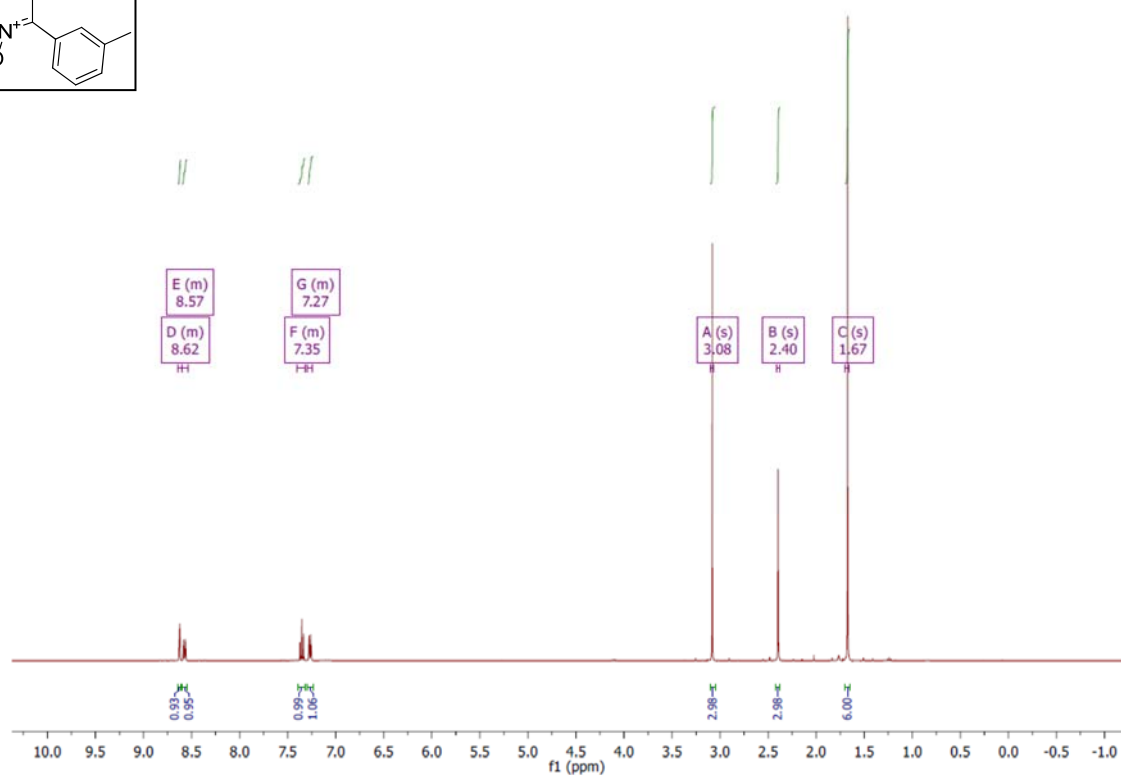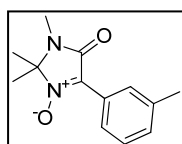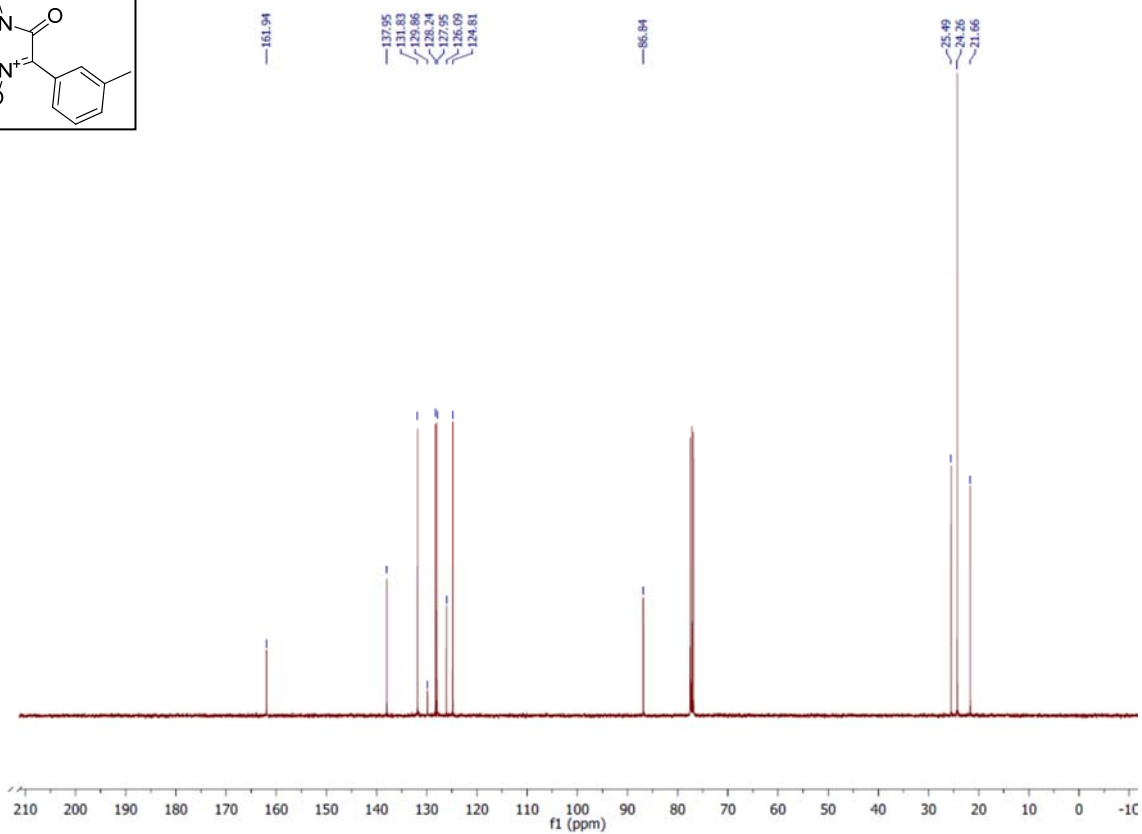

# 1,2,2-Trimethyl-5-oxo-4-(*o*-tolyl)-2,5-dihydro-1*H*-imidazole 3-oxide

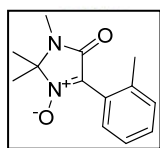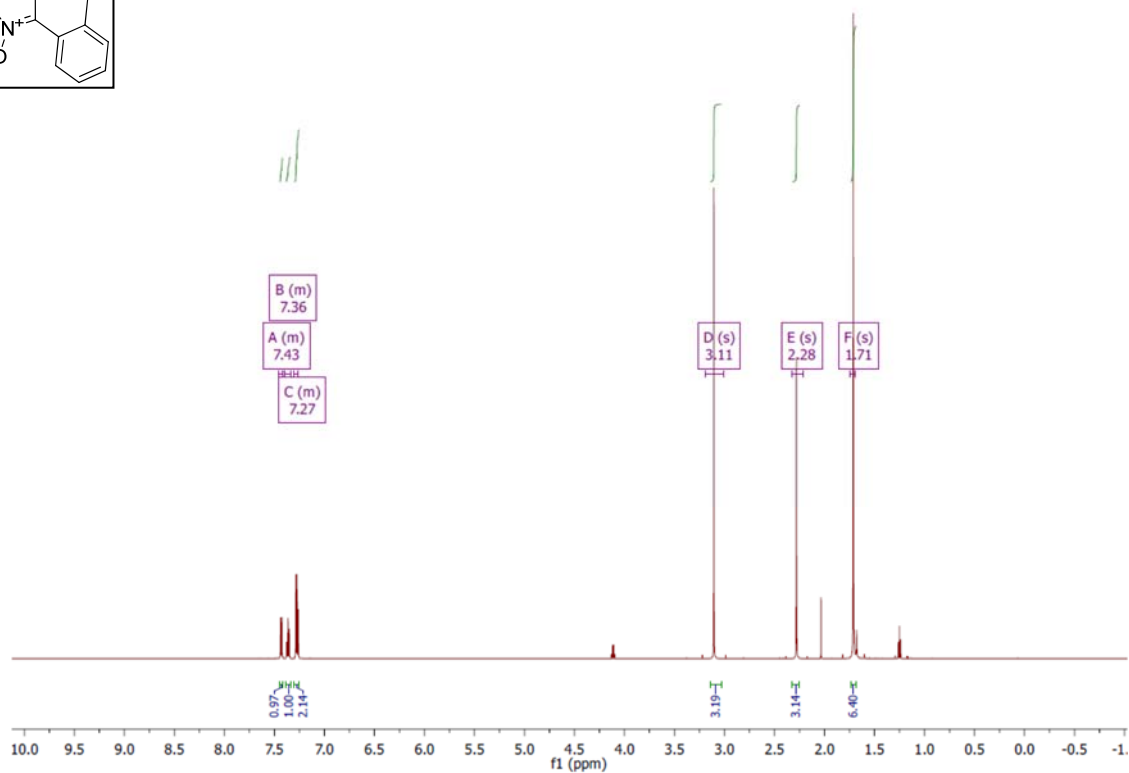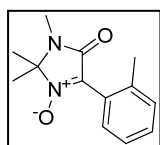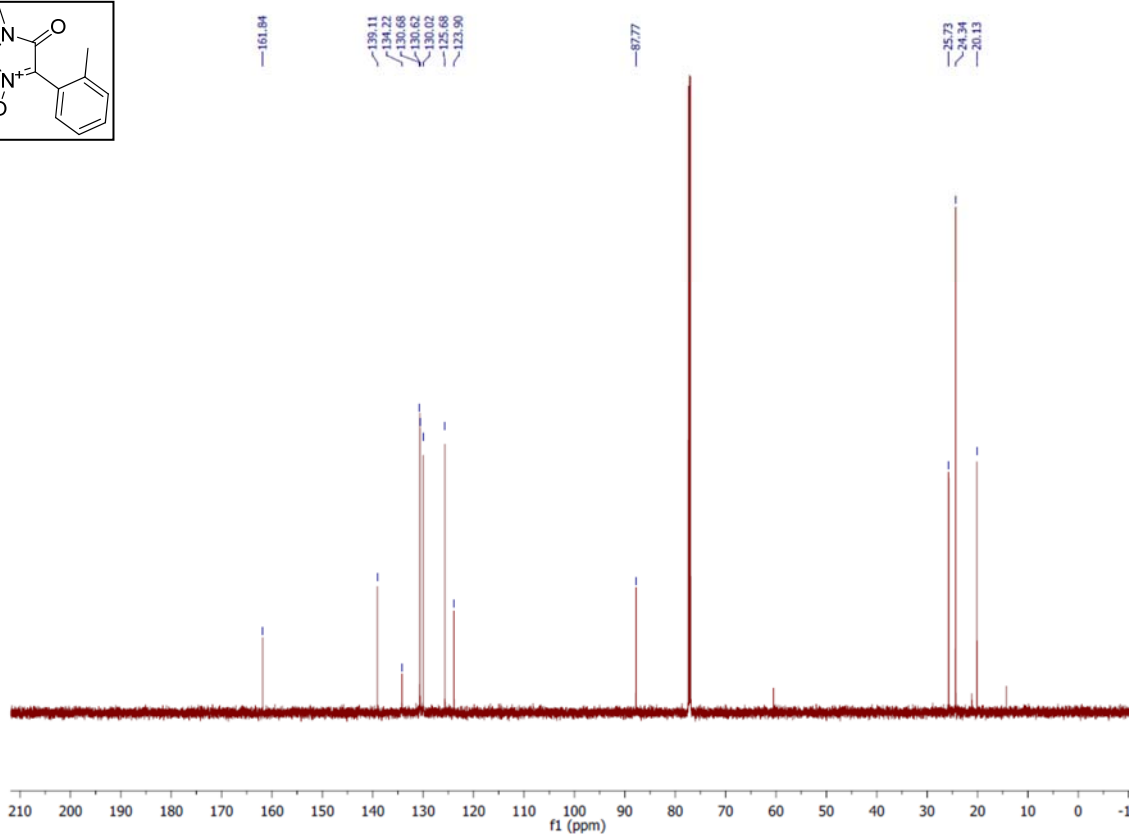

# 4-(4-Chlorophenyl)-1,2,2-trimethyl-5-oxo-2,5-dihydro-1H-imidazole 3-oxide

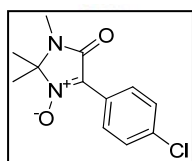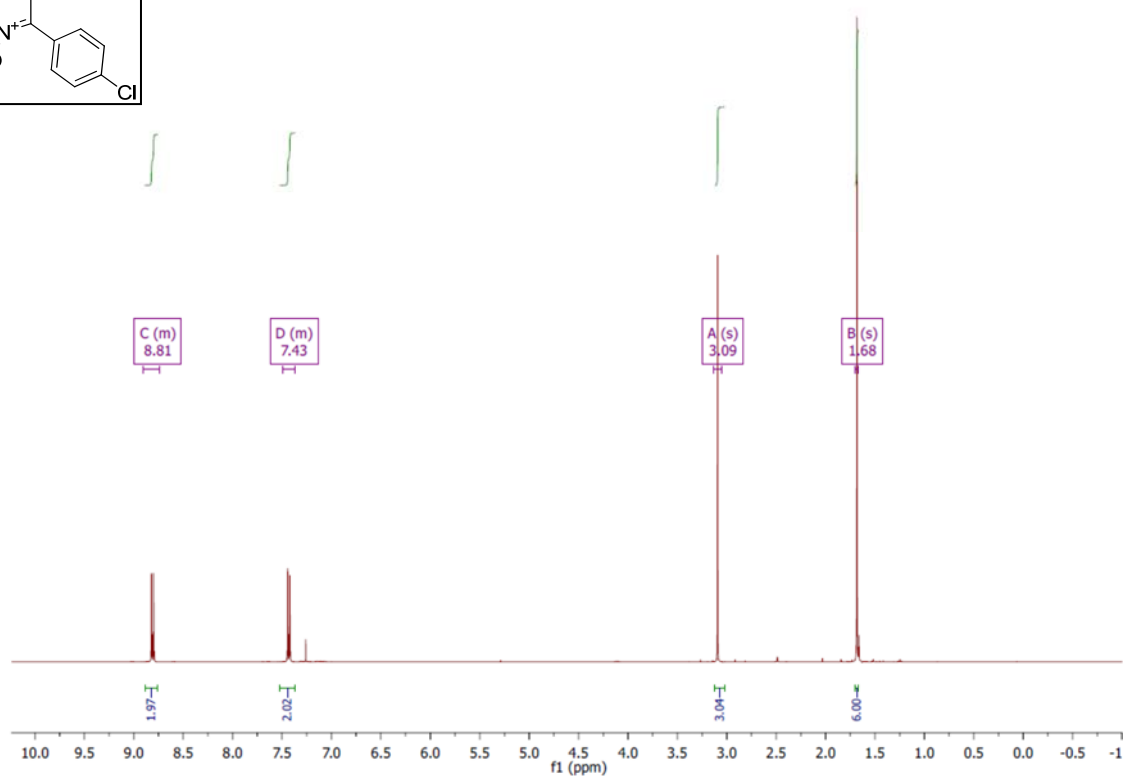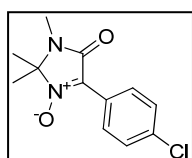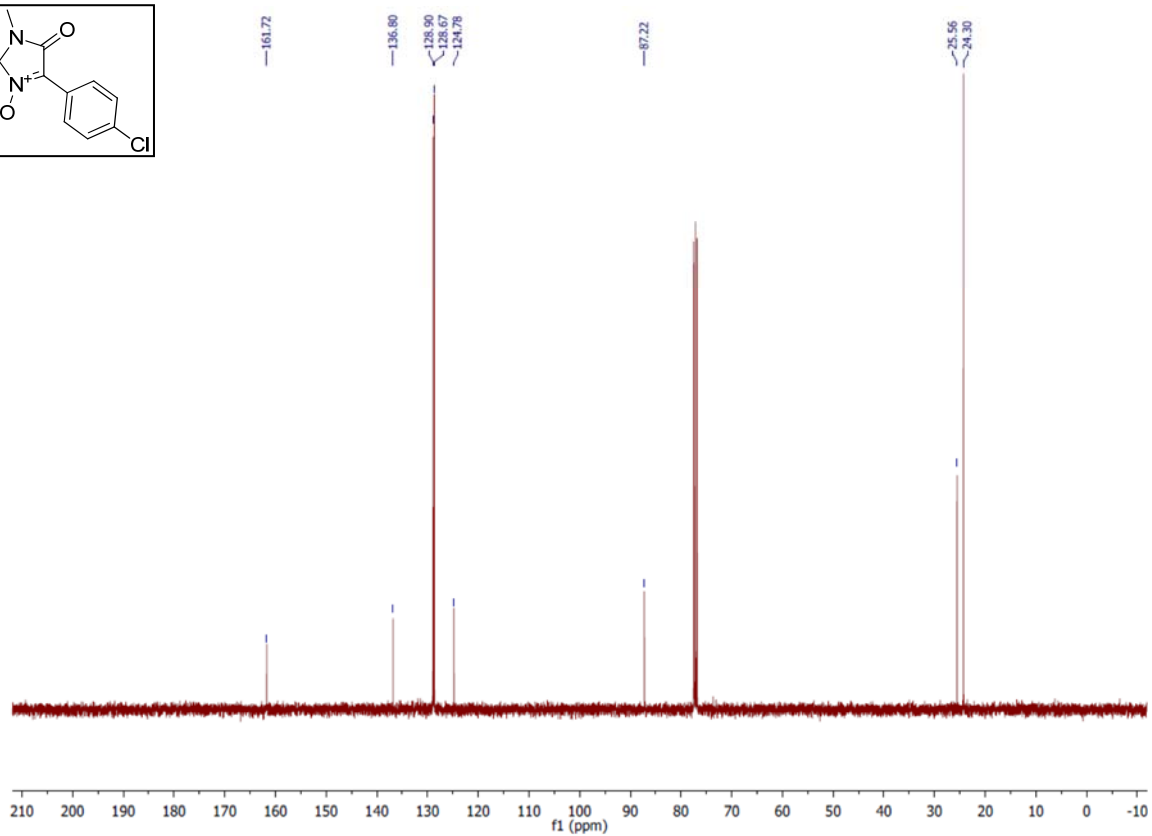

# 5-(4-Fluorophenyl)-2,2,3-trimethylimidazolidin-4-on

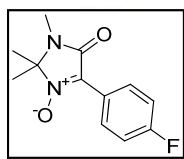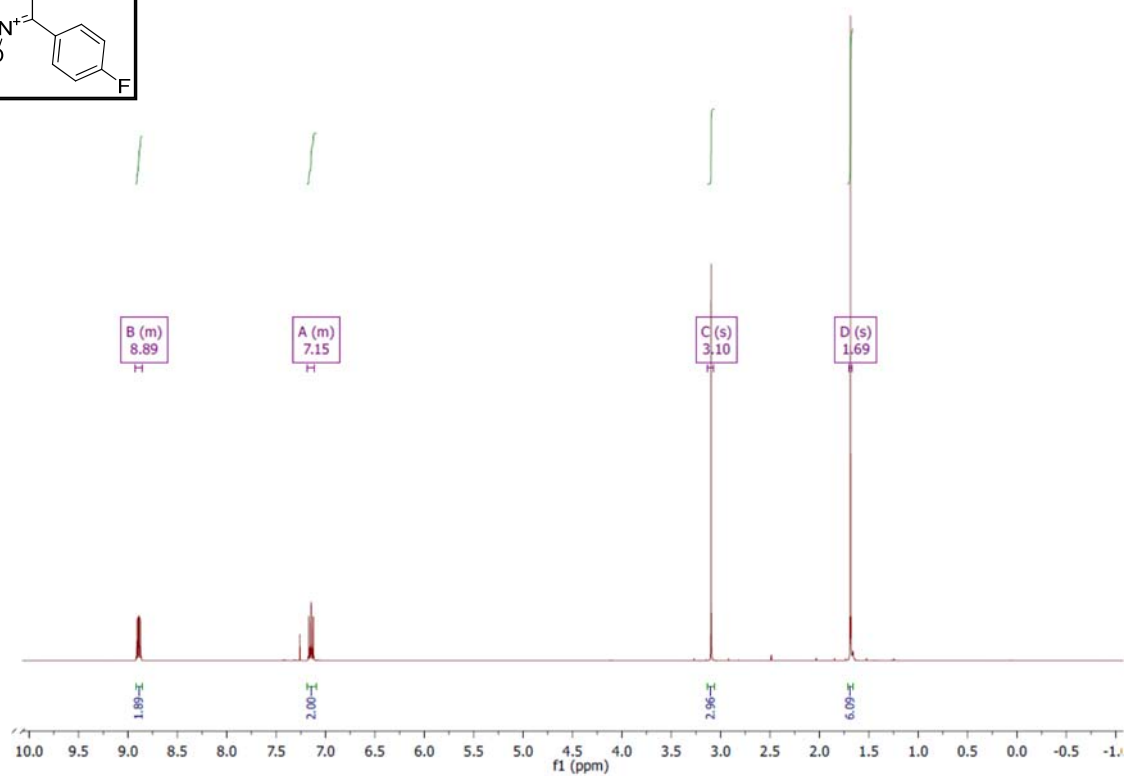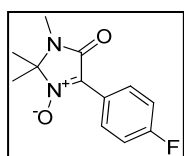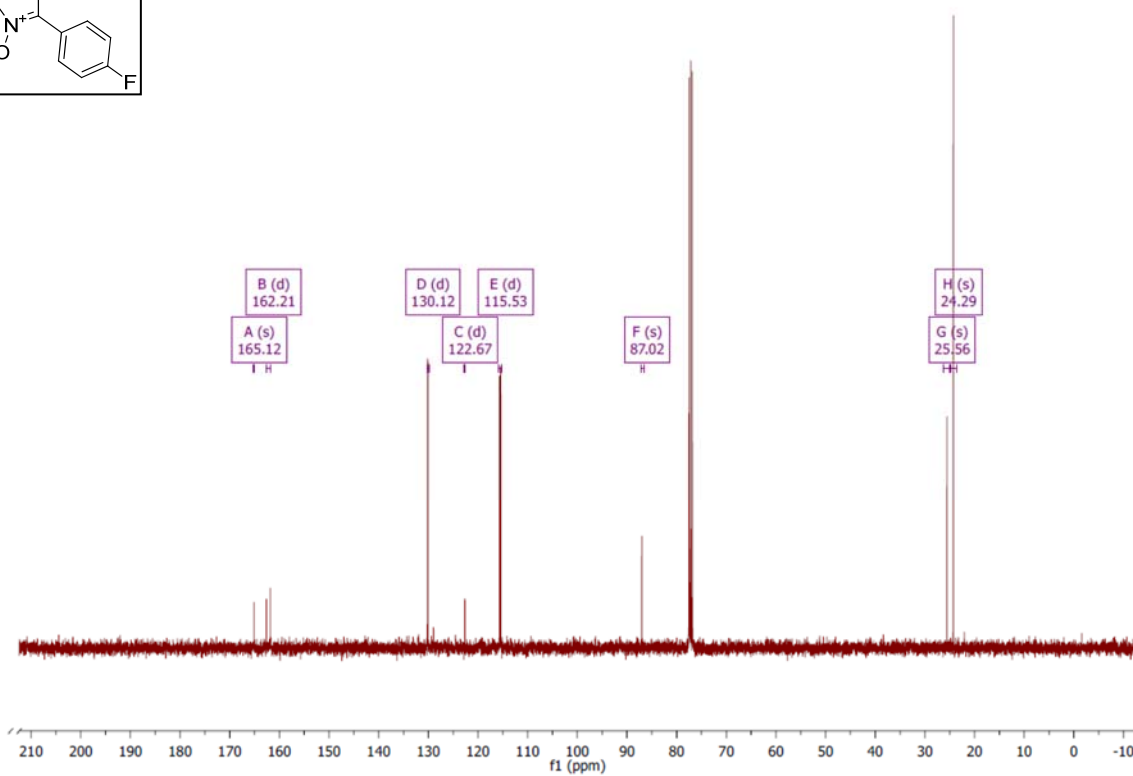

# 4-(4-Methoxyphenyl)-1,2,2-trimethyl-5-oxo-2,5-dihydro-1H-imidazole 3-oxide

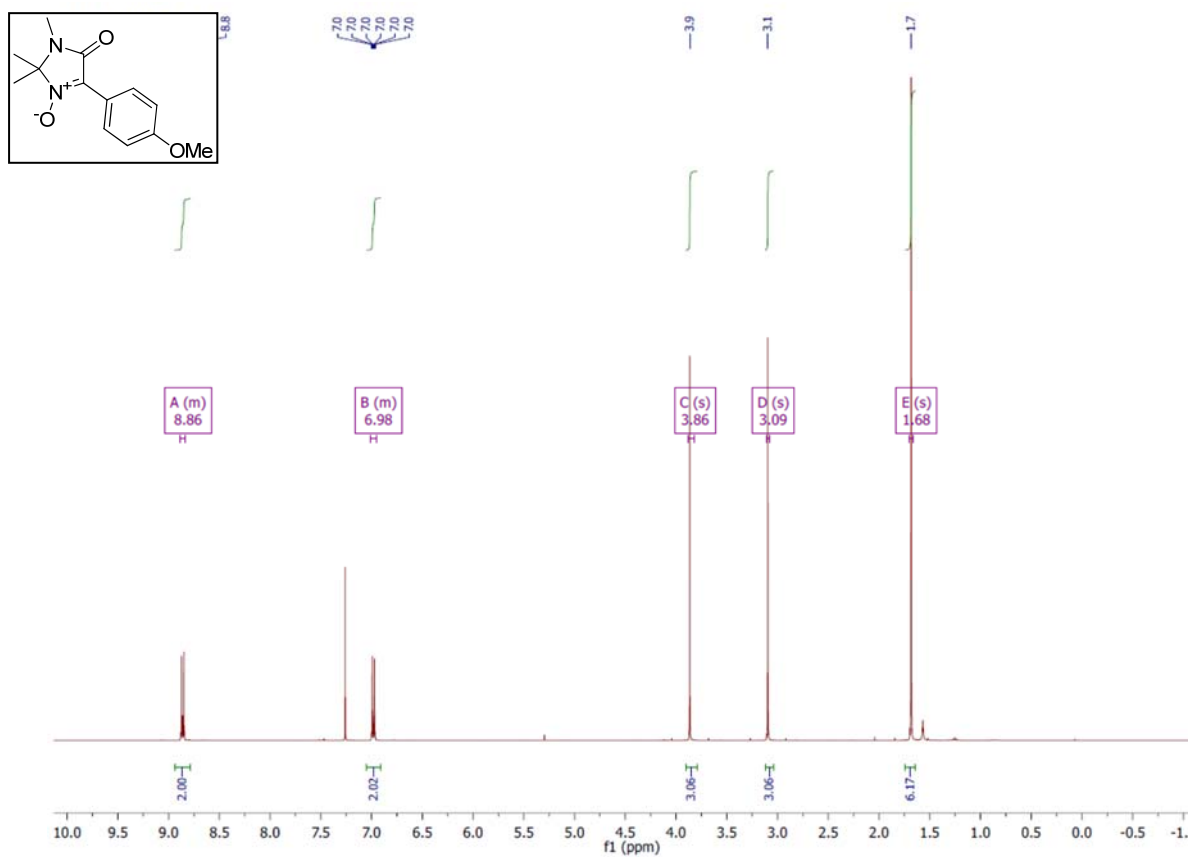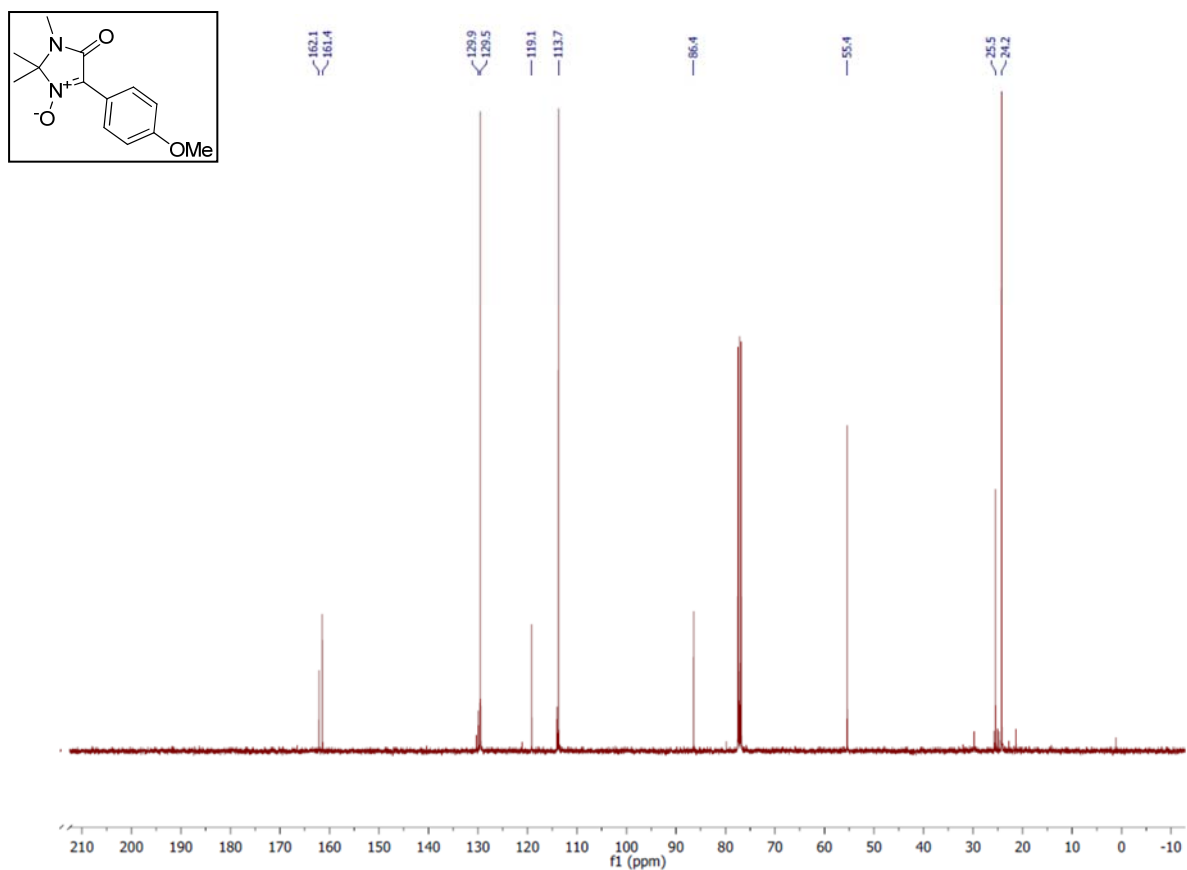

### 4-(4-Cyanophenyl)-1,2,2-trimethyl-5-oxo-2,5-dihydro-1H-imidazole 3-oxide

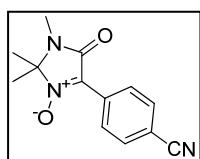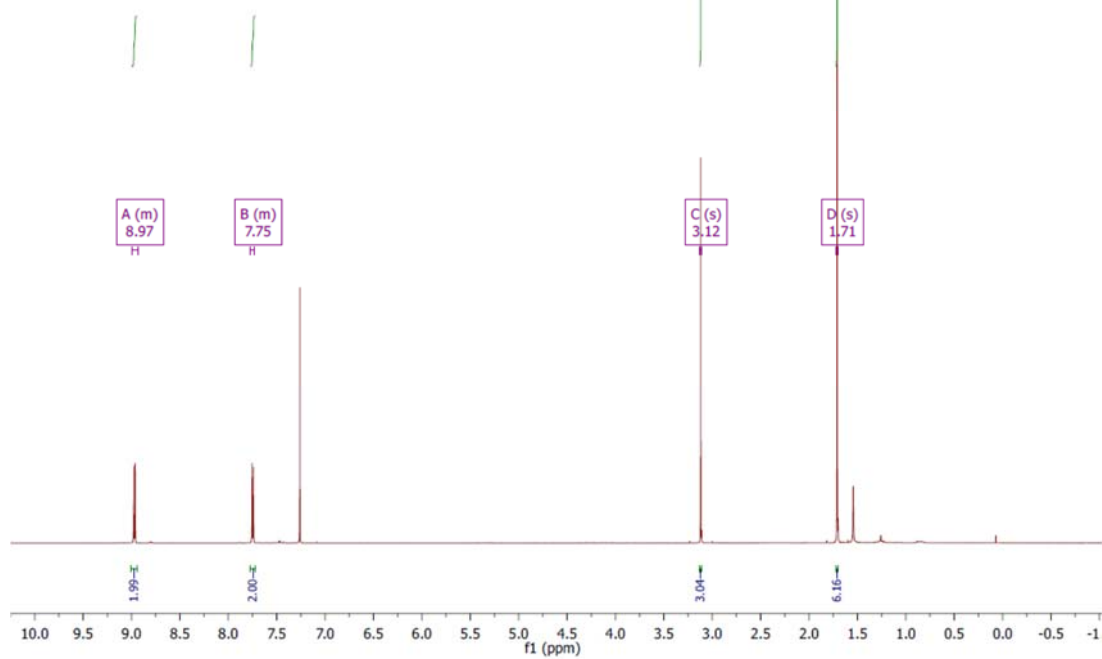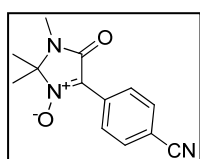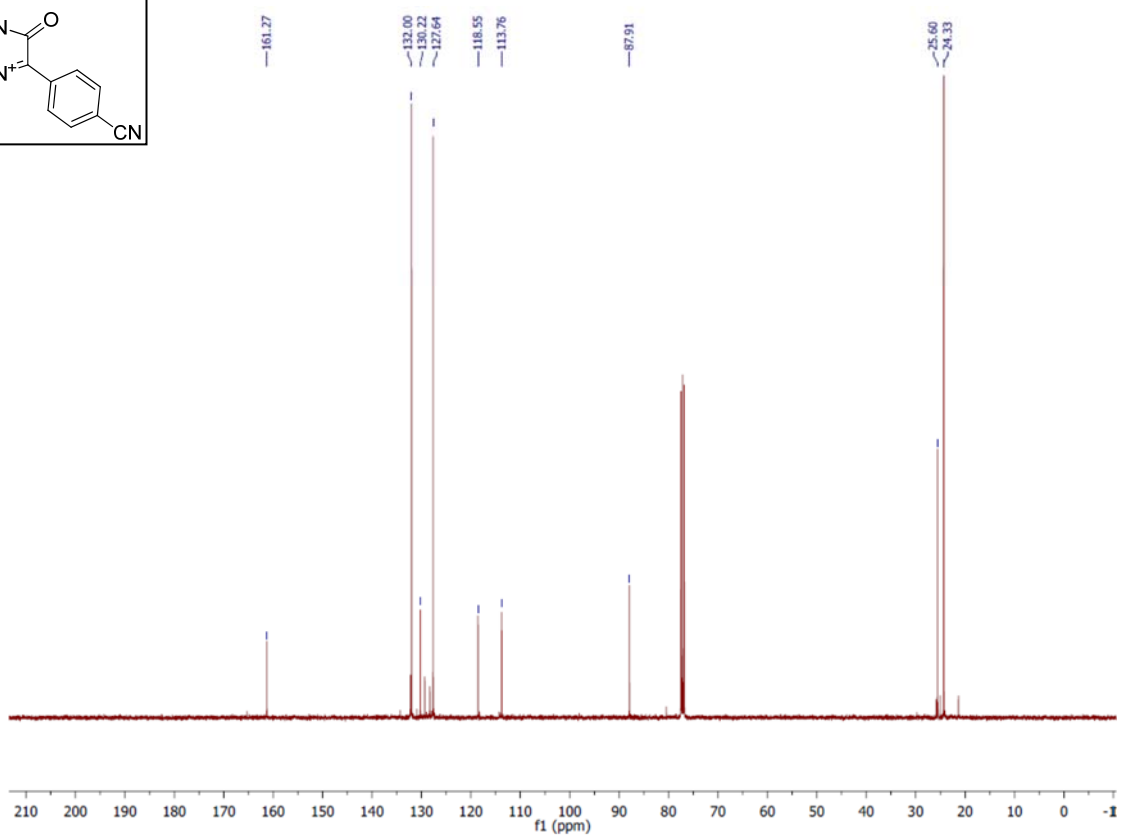



# 4-(4-(Dimethylamino)phenyl)-1,2,2-trimethyl-5-oxo-2,5-dihydro-1H-imidazol-3-oxide

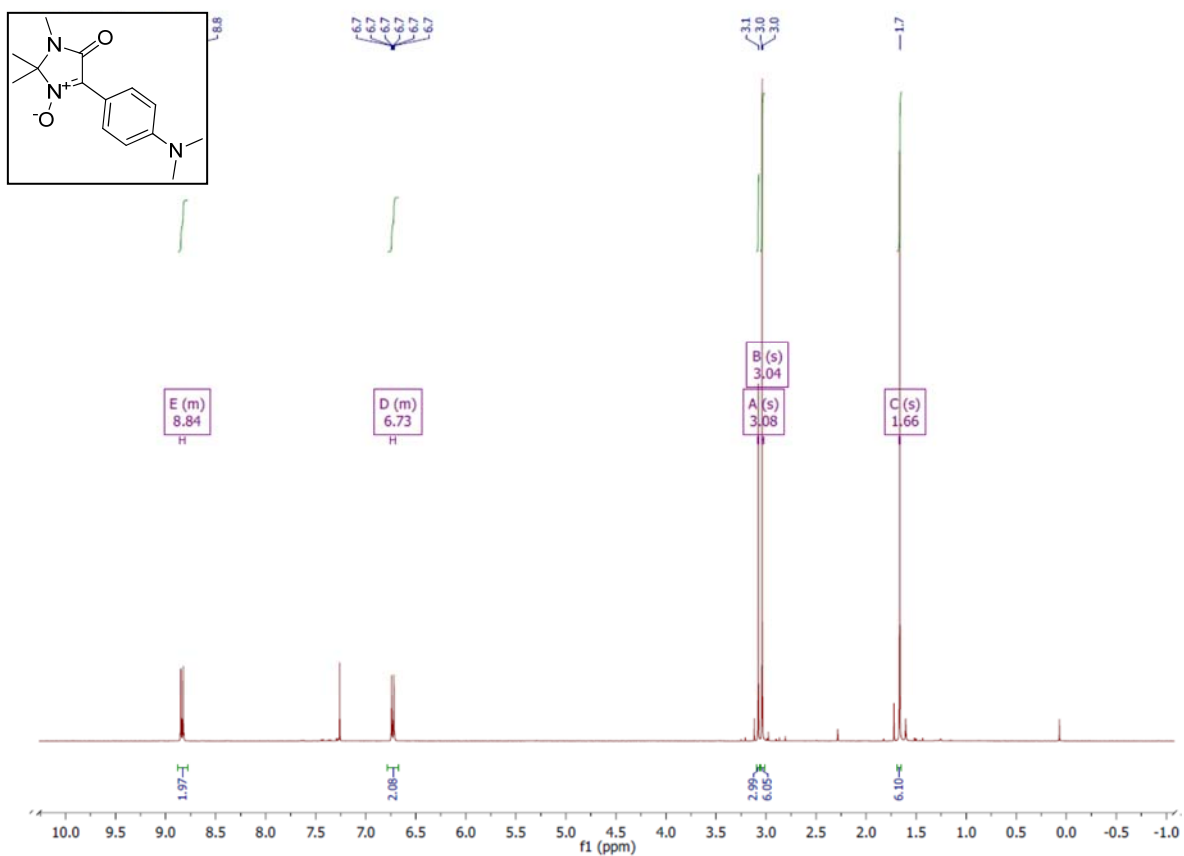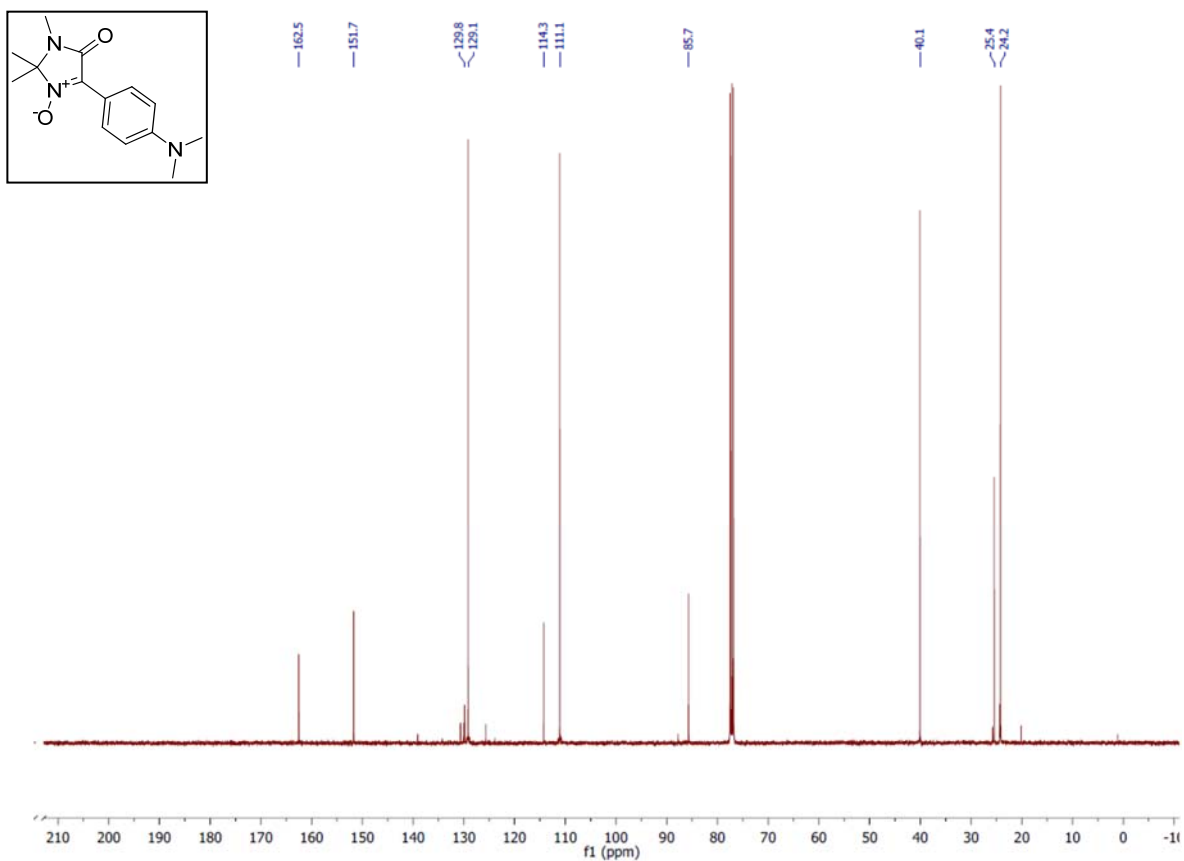

# 1,2,2-Trimethyl-4-phenyl-1*H*-imidazol-5(2*H*)-one (1a)

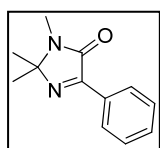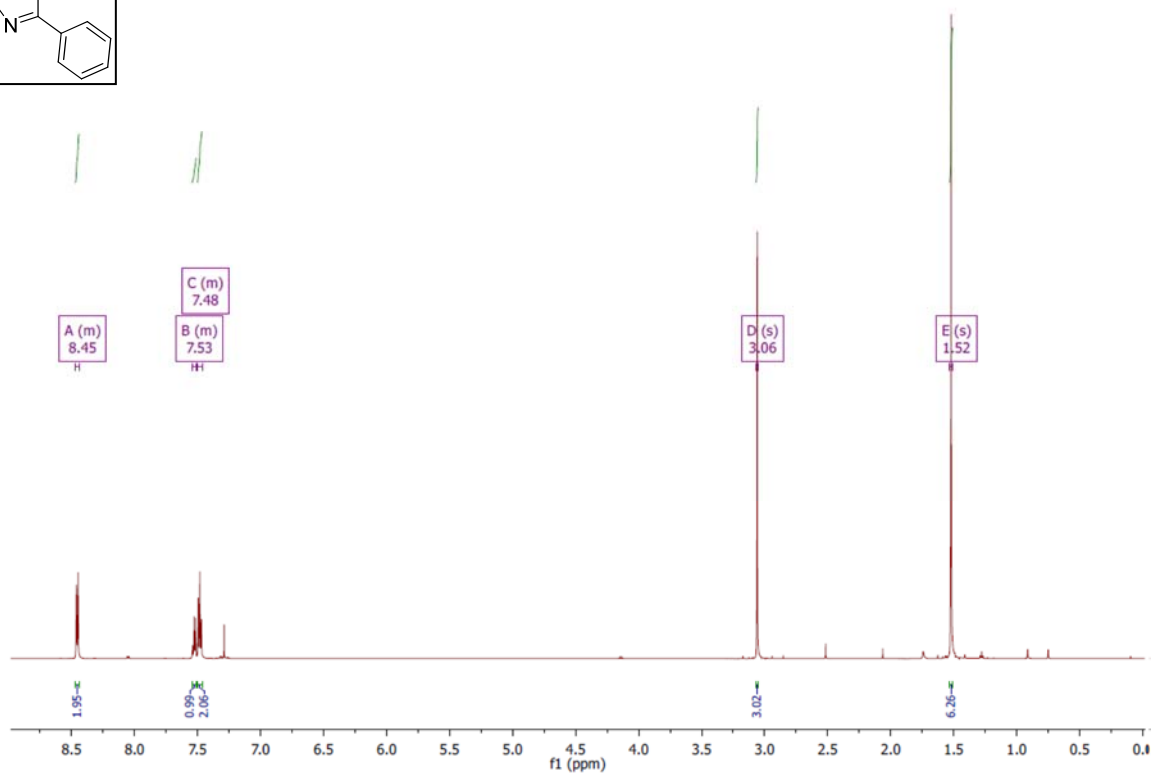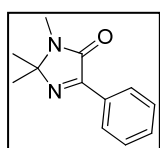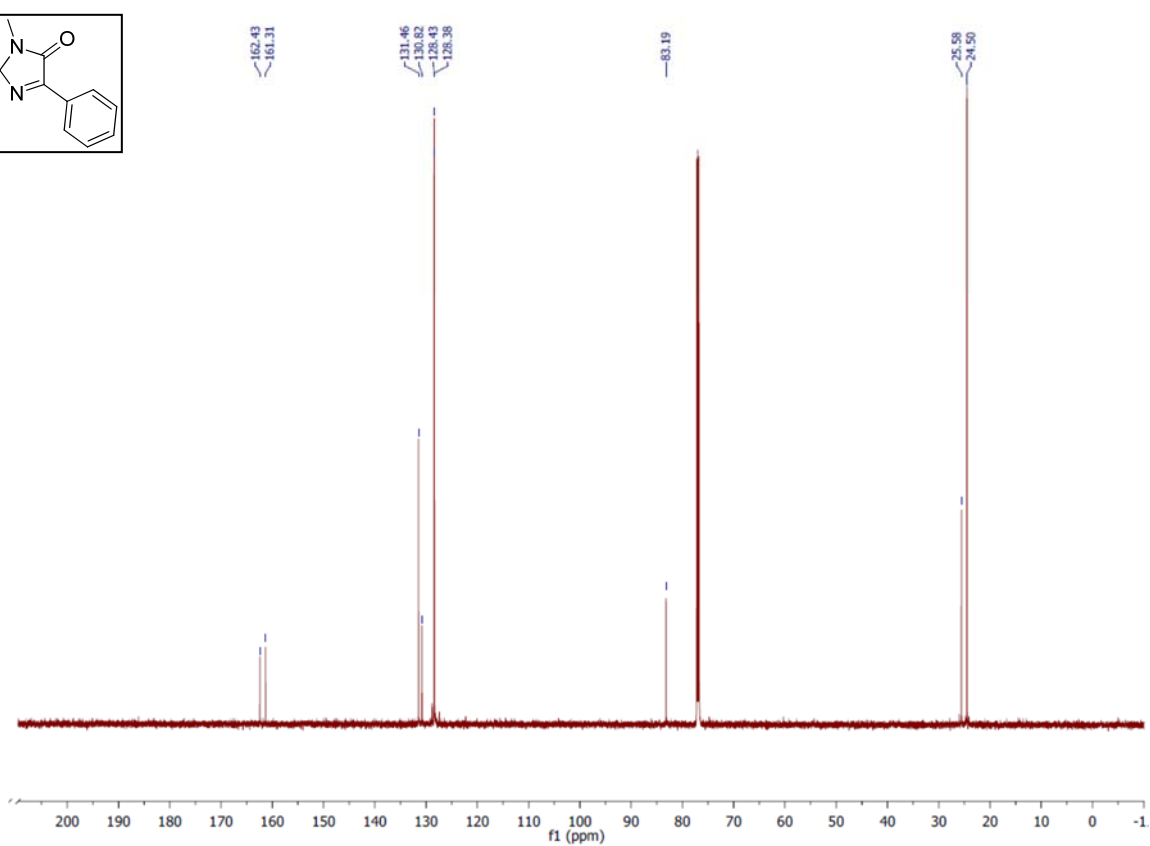

# 1,2,2-Trimethyl-4-(*p*-tolyl)-1*H*-imidazol-5(2*H*)-one (1b)

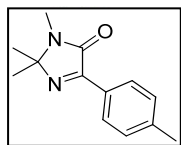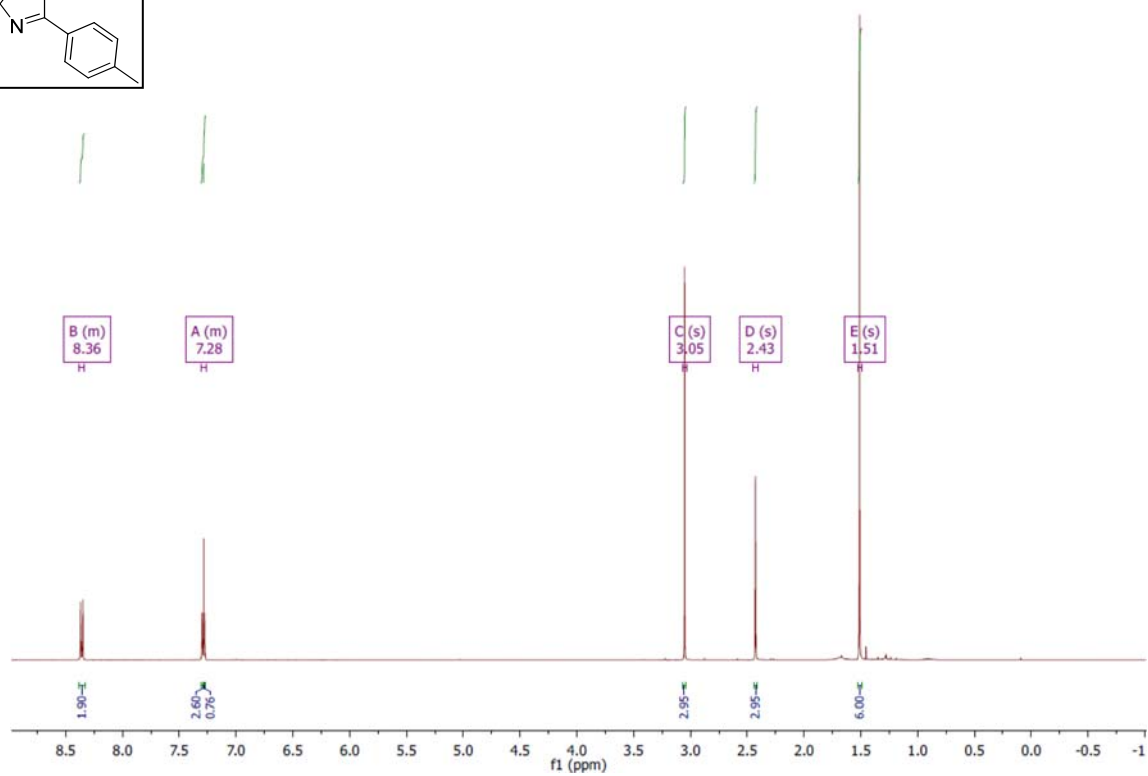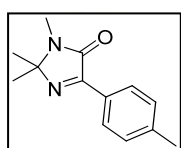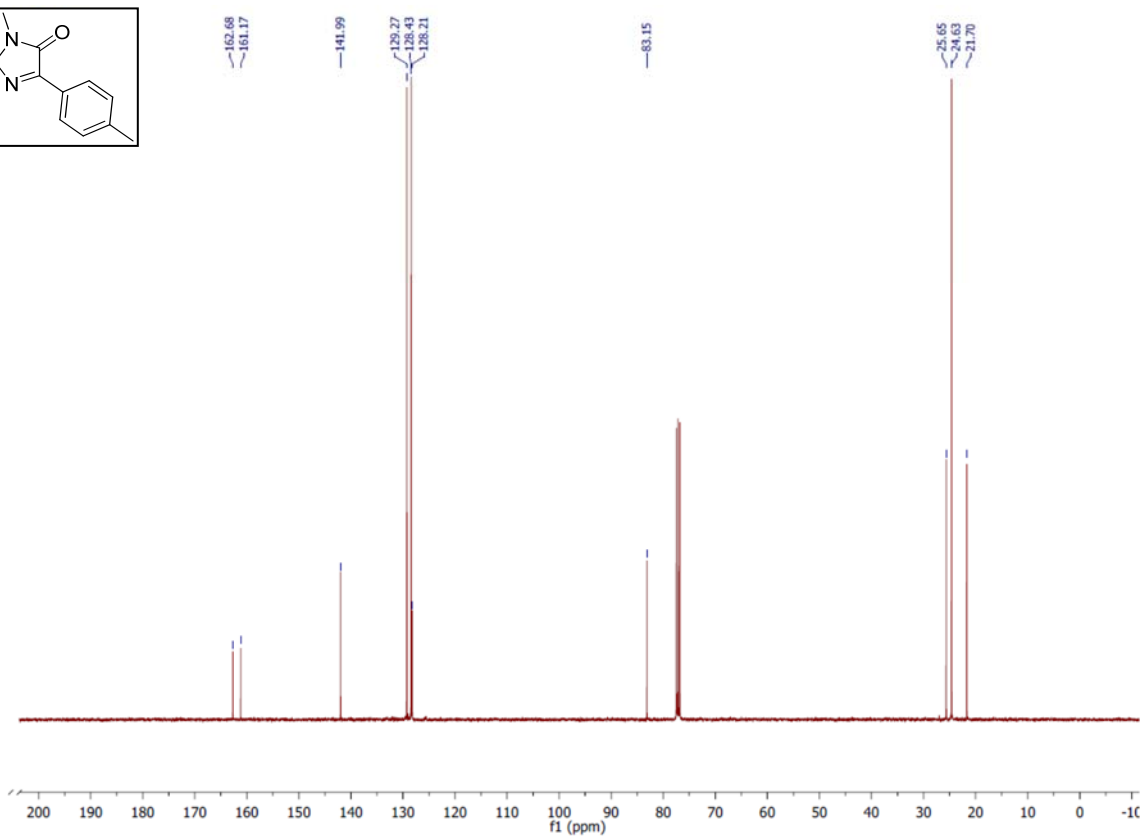

# 1,2,2-Trimethyl-4-(*m*-tolyl)-1*H*-imidazol-5(2*H*)-one (1c)

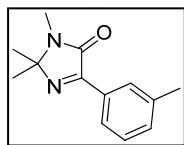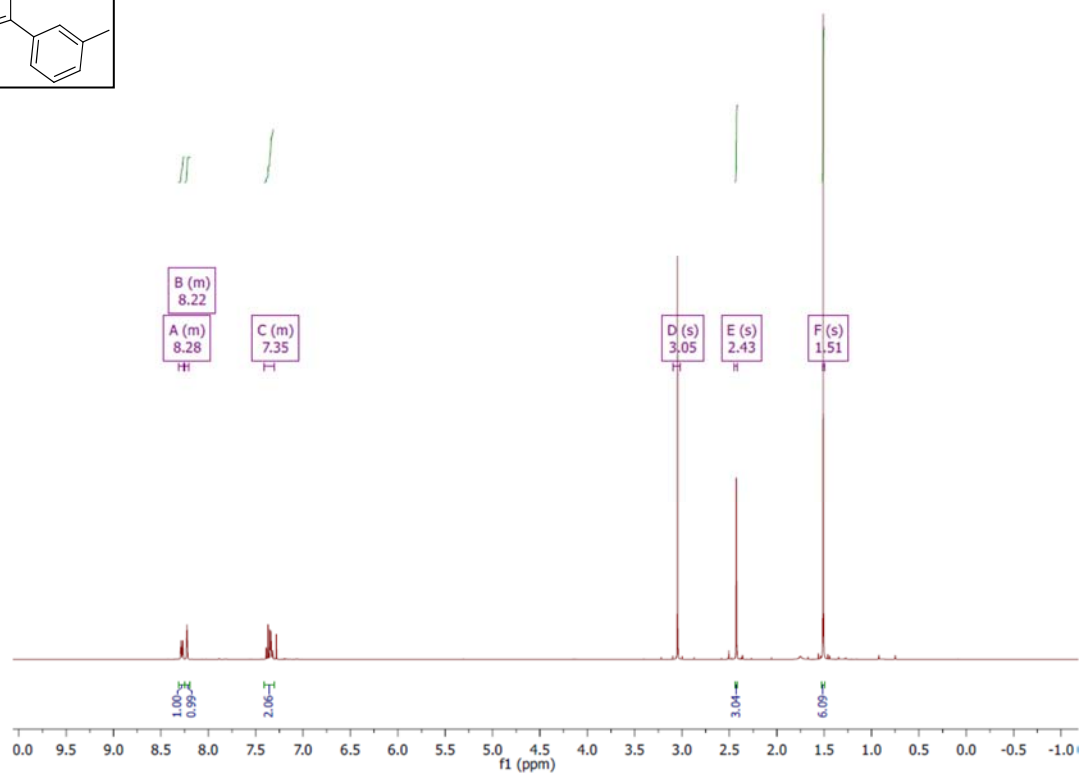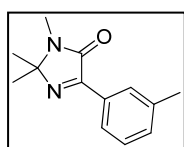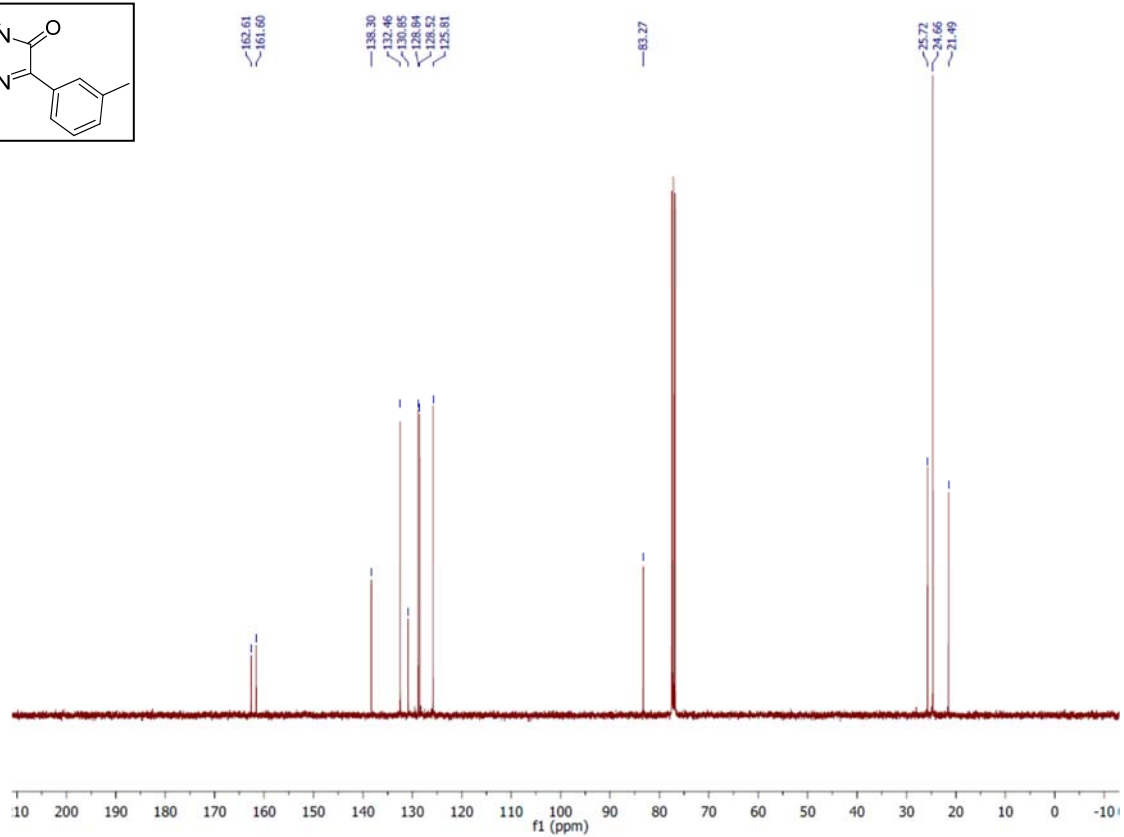

# 1,2,2-Trimethyl-4-(*o*-tolyl)-1*H*-imidazol-5(2*H*)-one (1d)

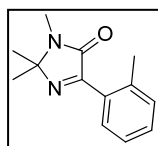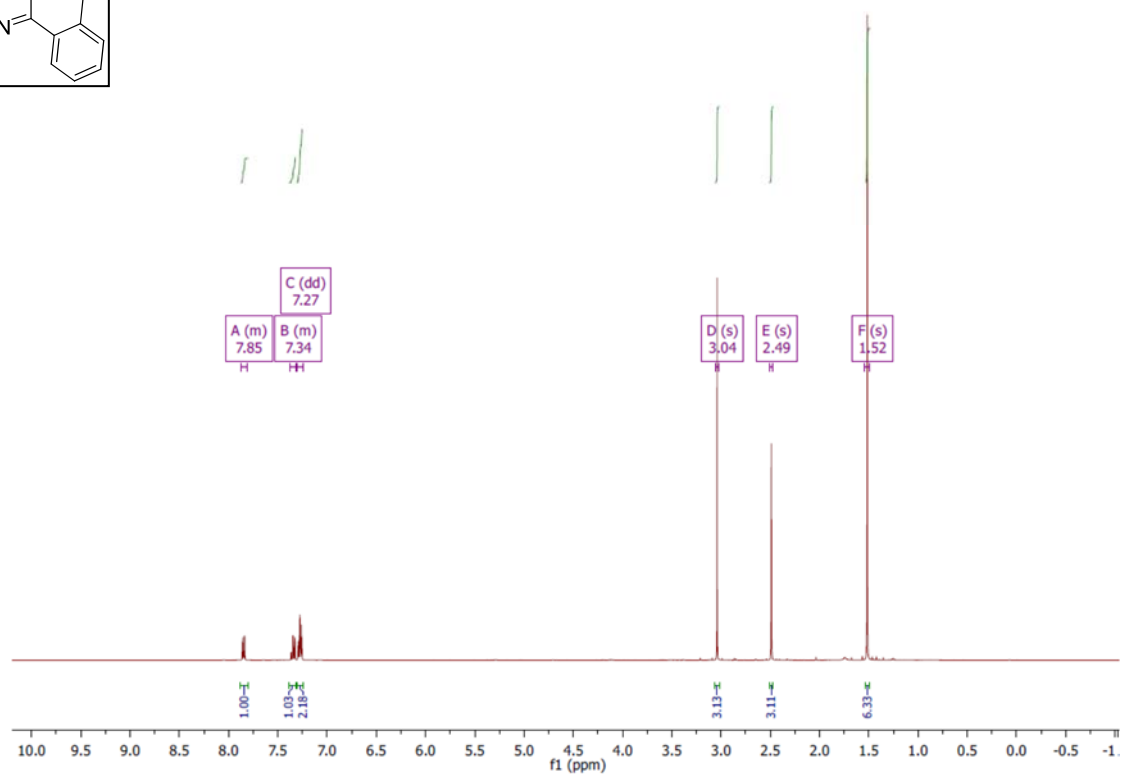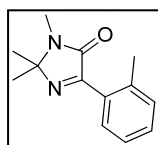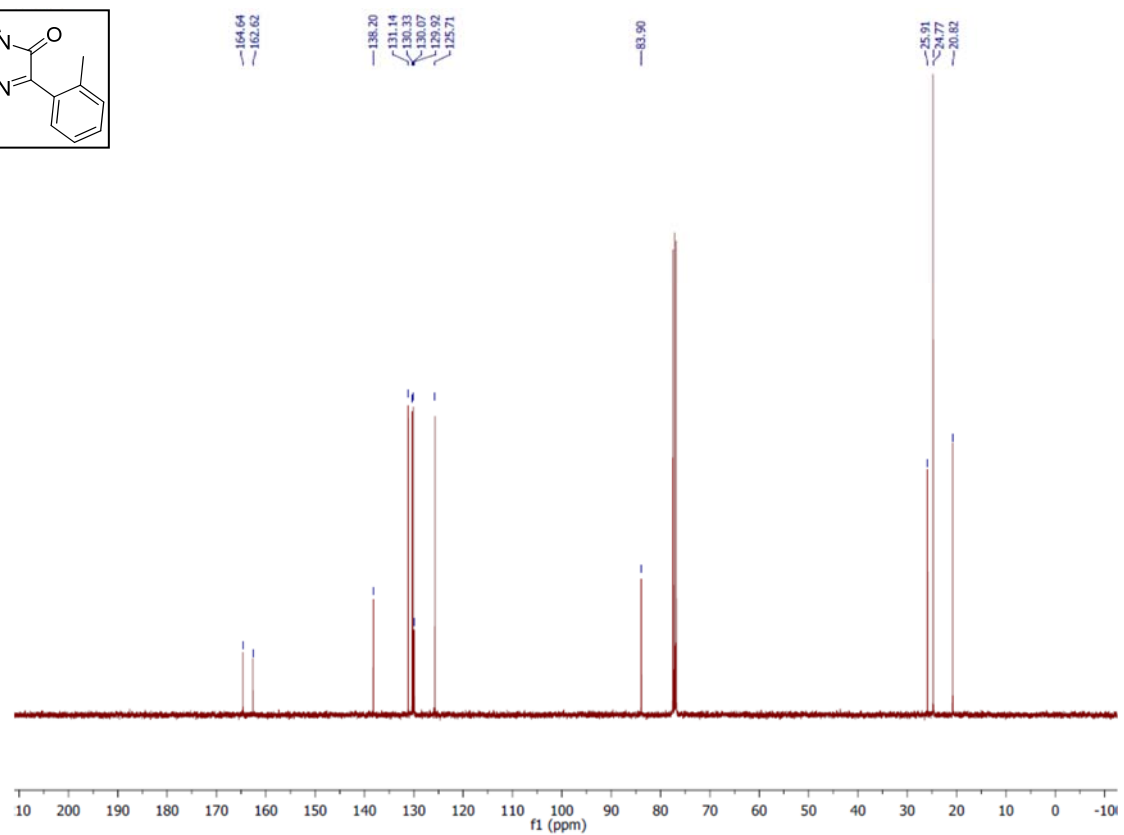

### 4-(4-Chlorophenyl)-1,2,2-trimethyl-1H-imidazol-5(2H)-one (1e)

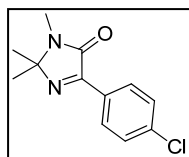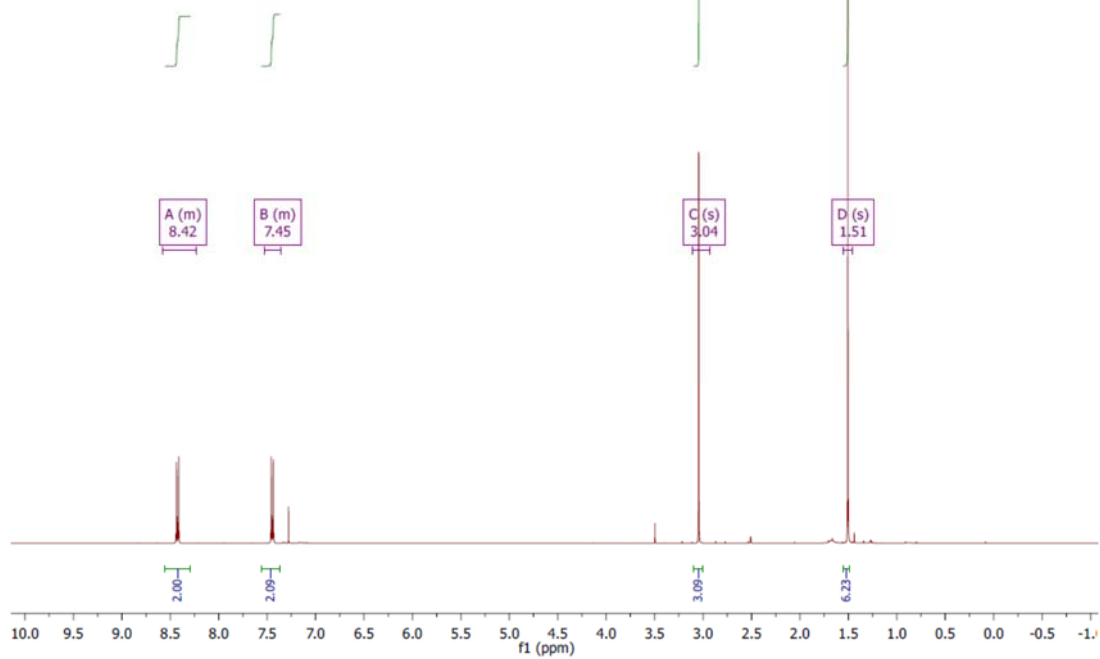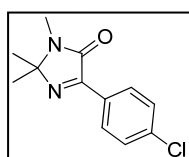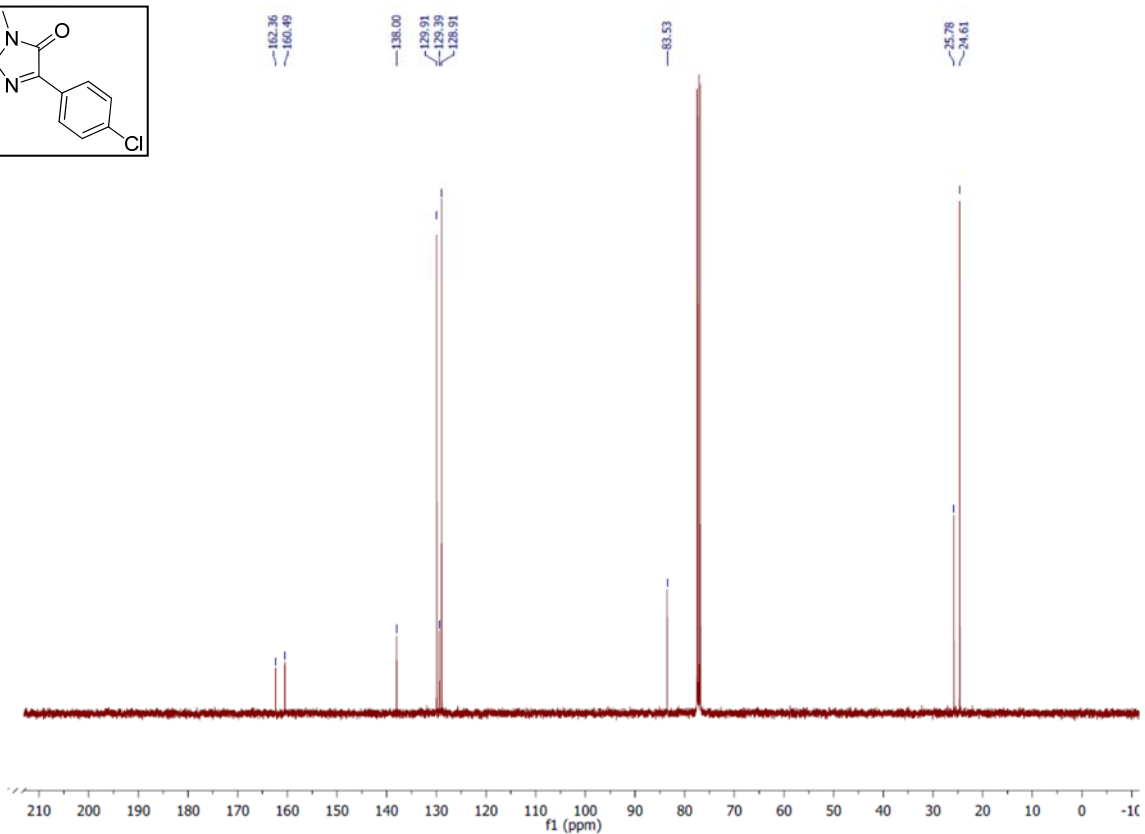

### 4-(4-Fluorophenyl)-1,2,2-trimethyl-1*H*-imidazol-5(2*H*)-one (1f)

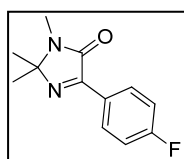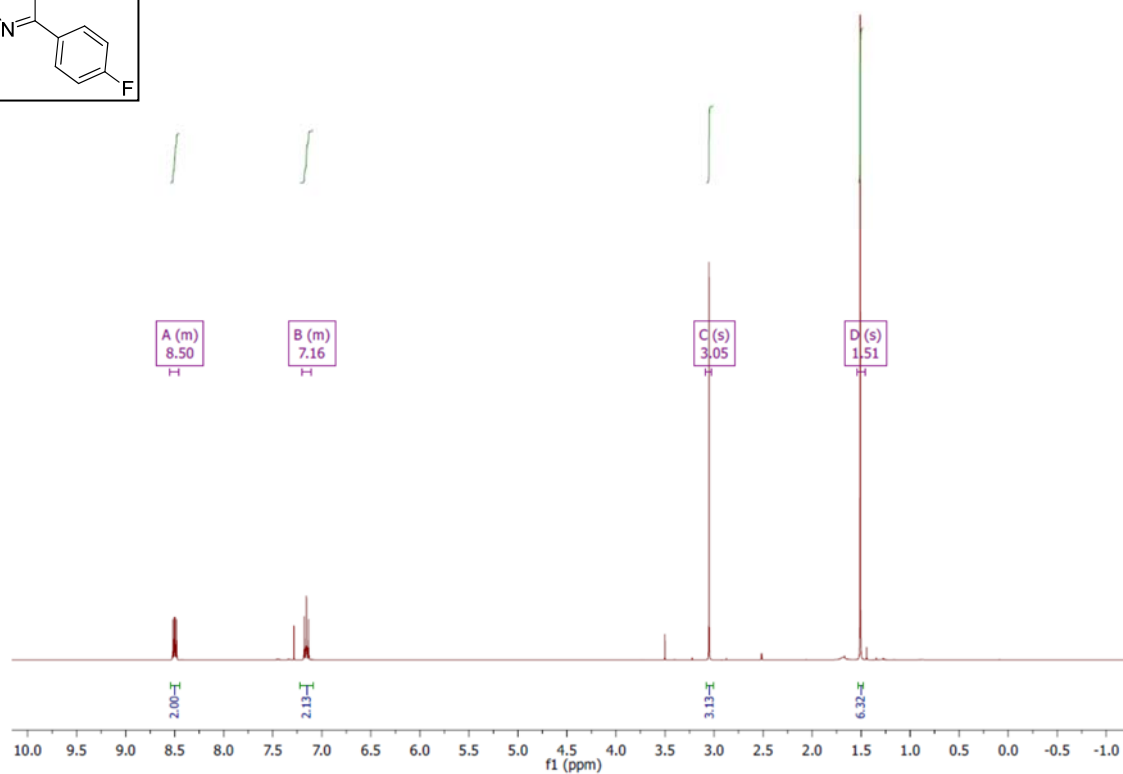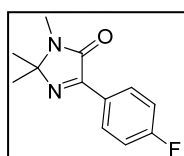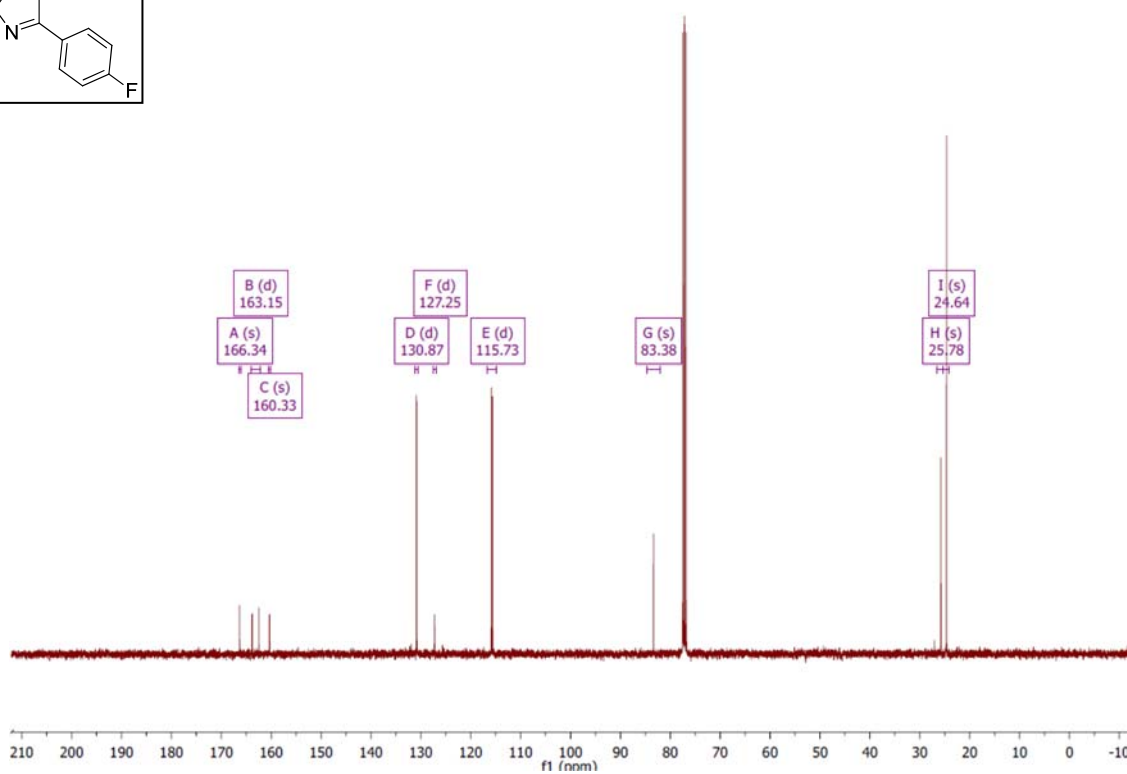

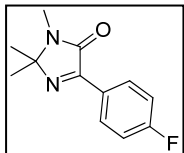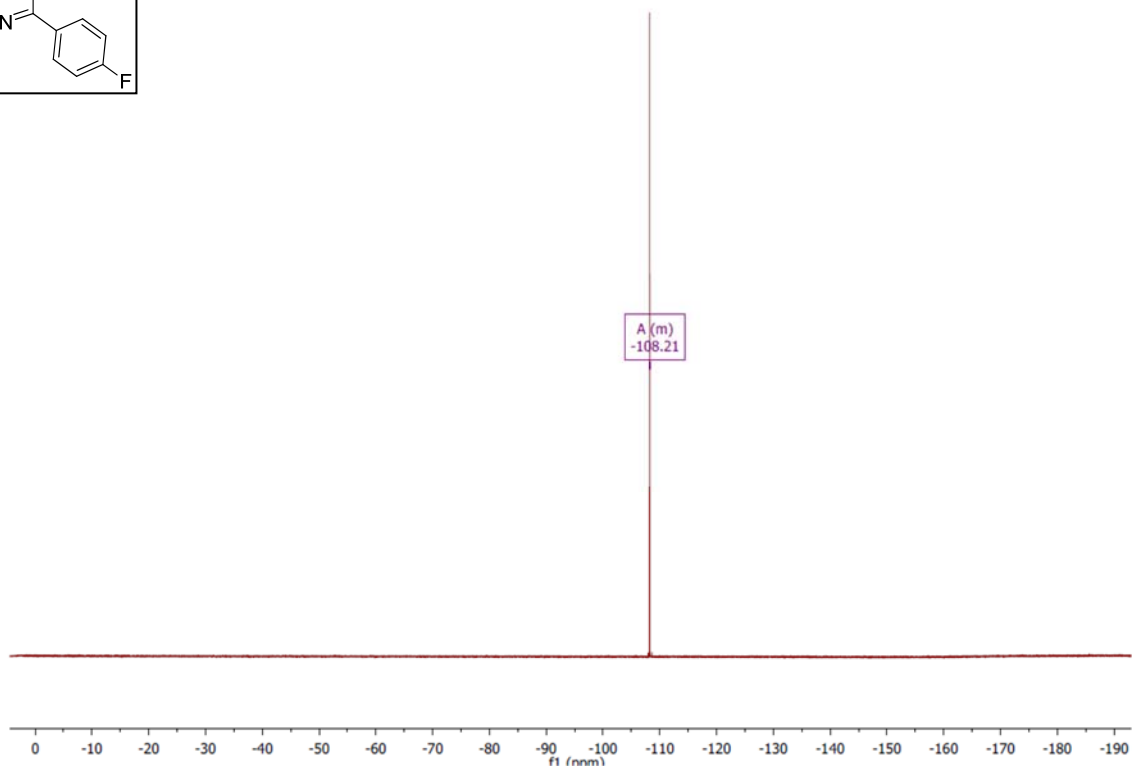



### 4-(4-Methoxyphenyl)-1,2,2-trimethyl-1H-imidazol-5(2H)-one (1g)

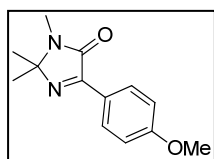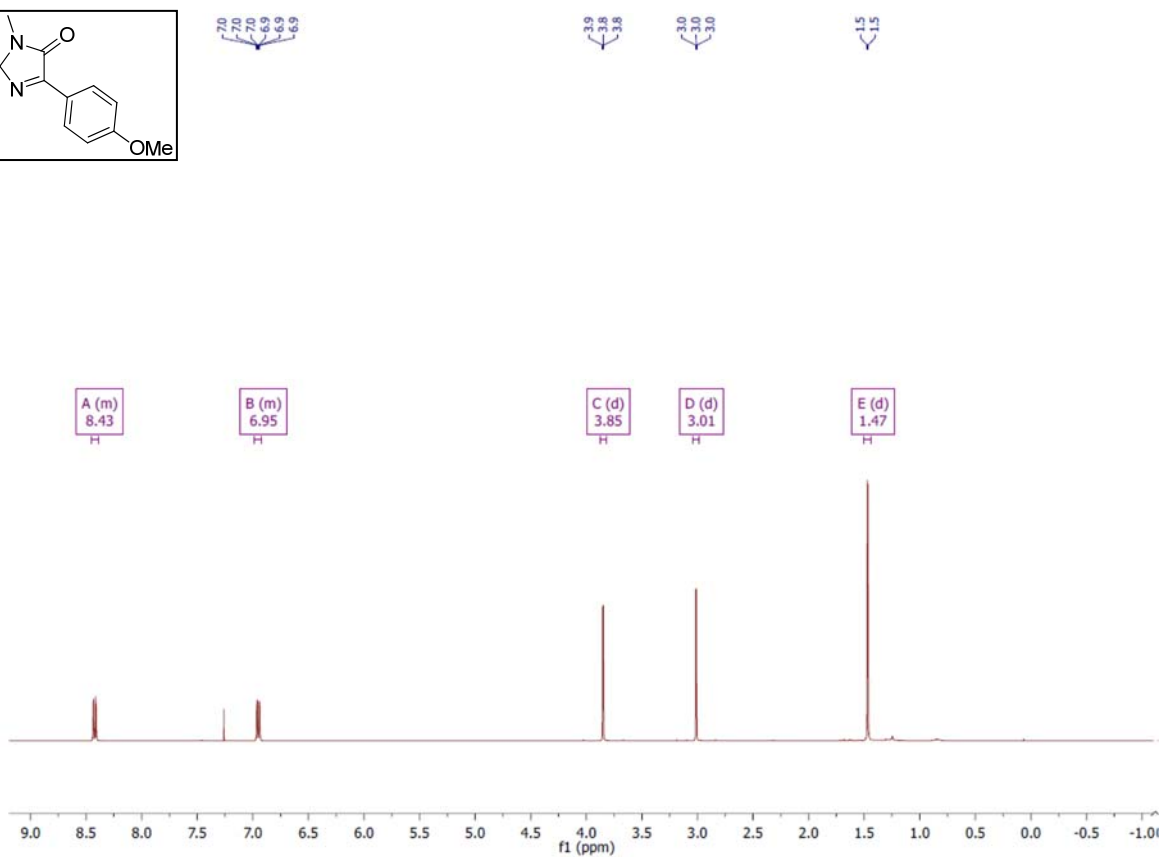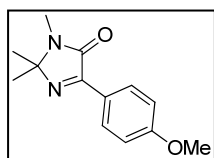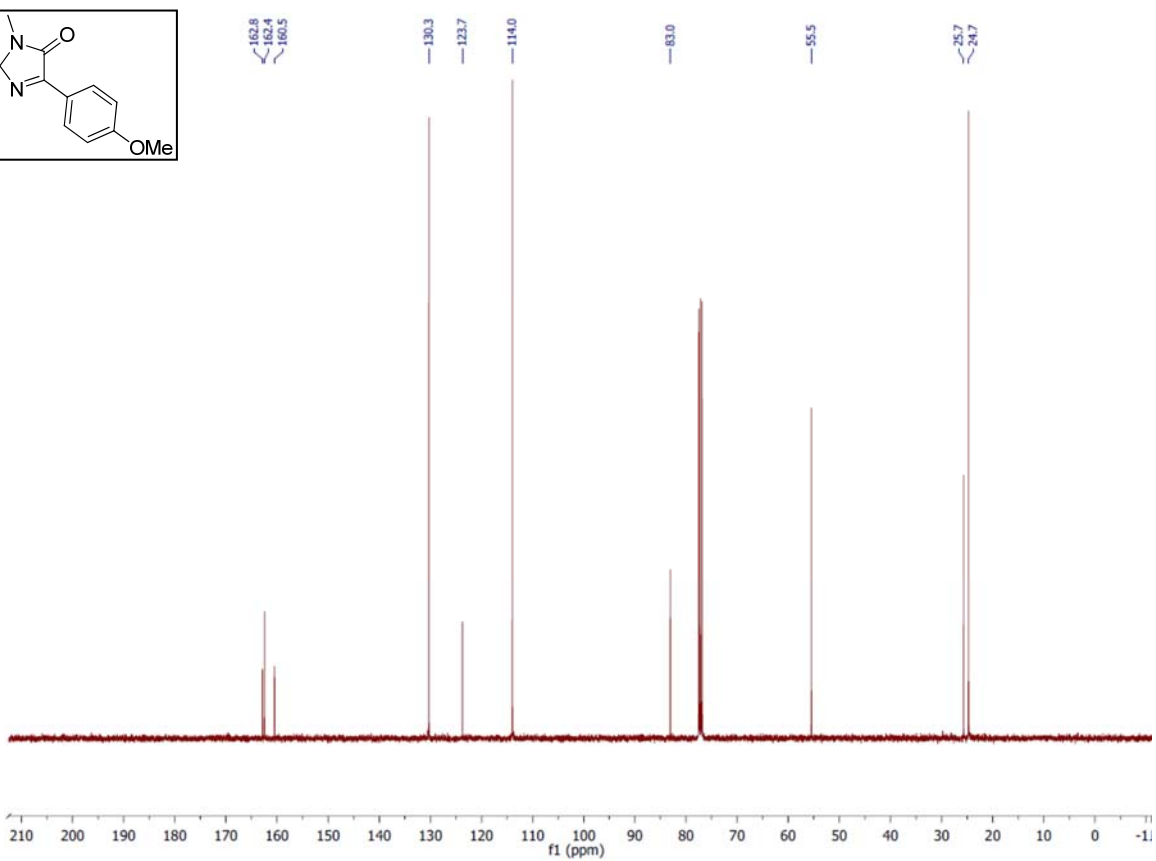

### 4-(1,2,2-Trimethyl-5-oxo-2,5-dihydro-1H-imidazol-4-yl)benzonitrile (1h)

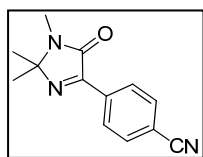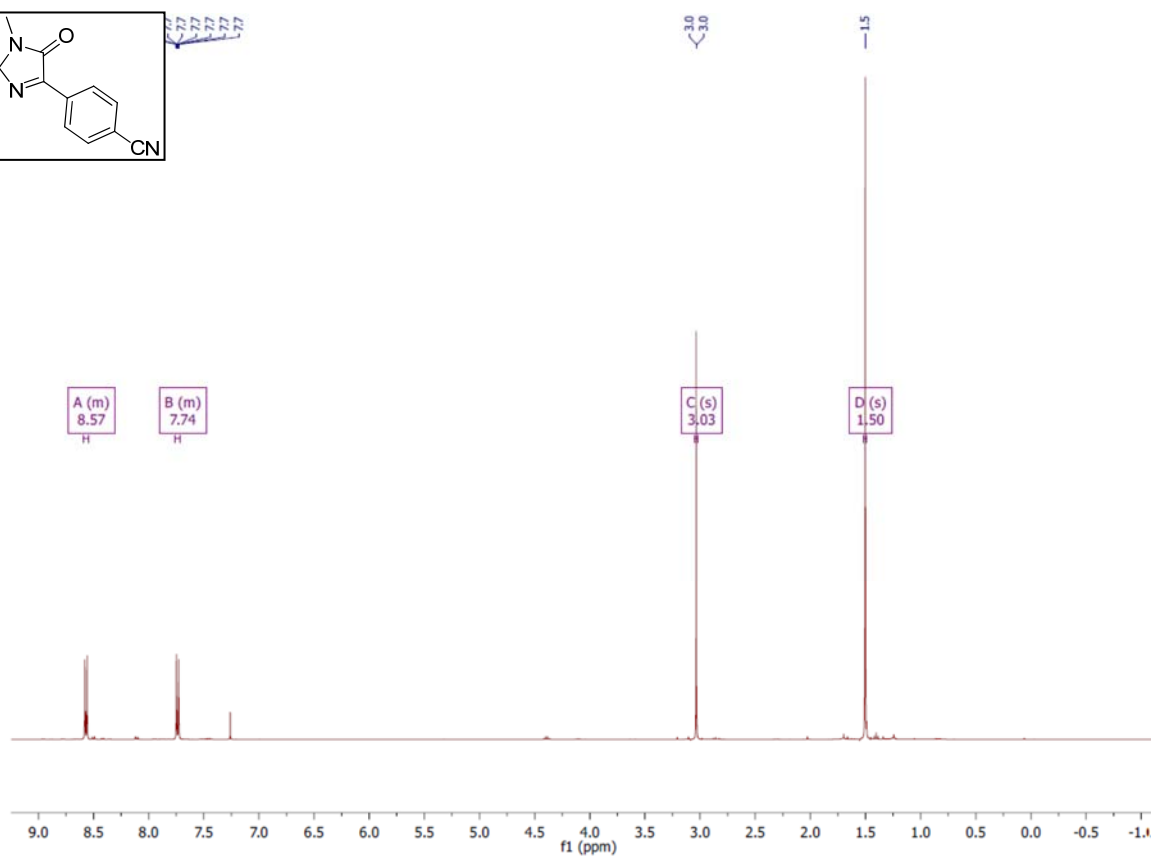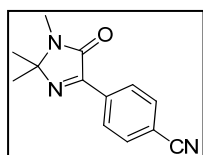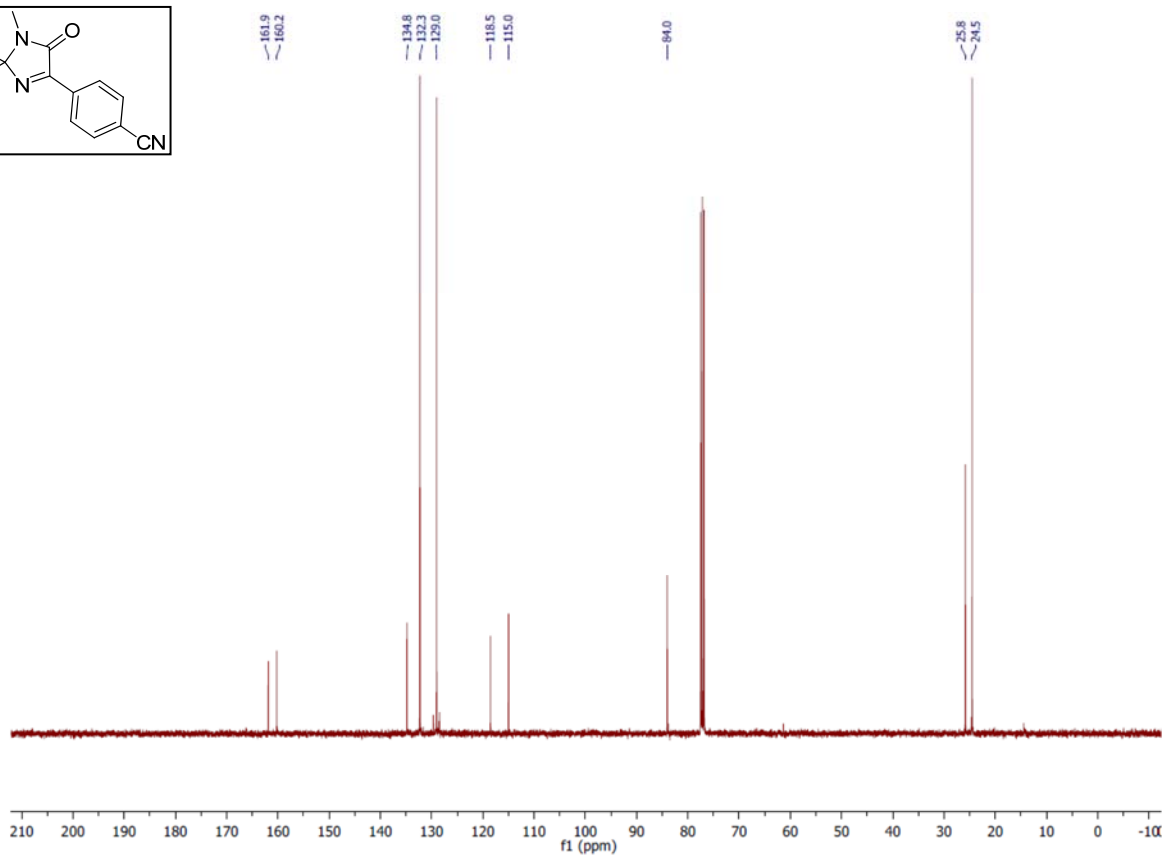

### 4-(4-(Dimethylamino)phenyl)-1,2,2-trimethyl-1*H*-imidazol-5(2*H*)-one (1i)

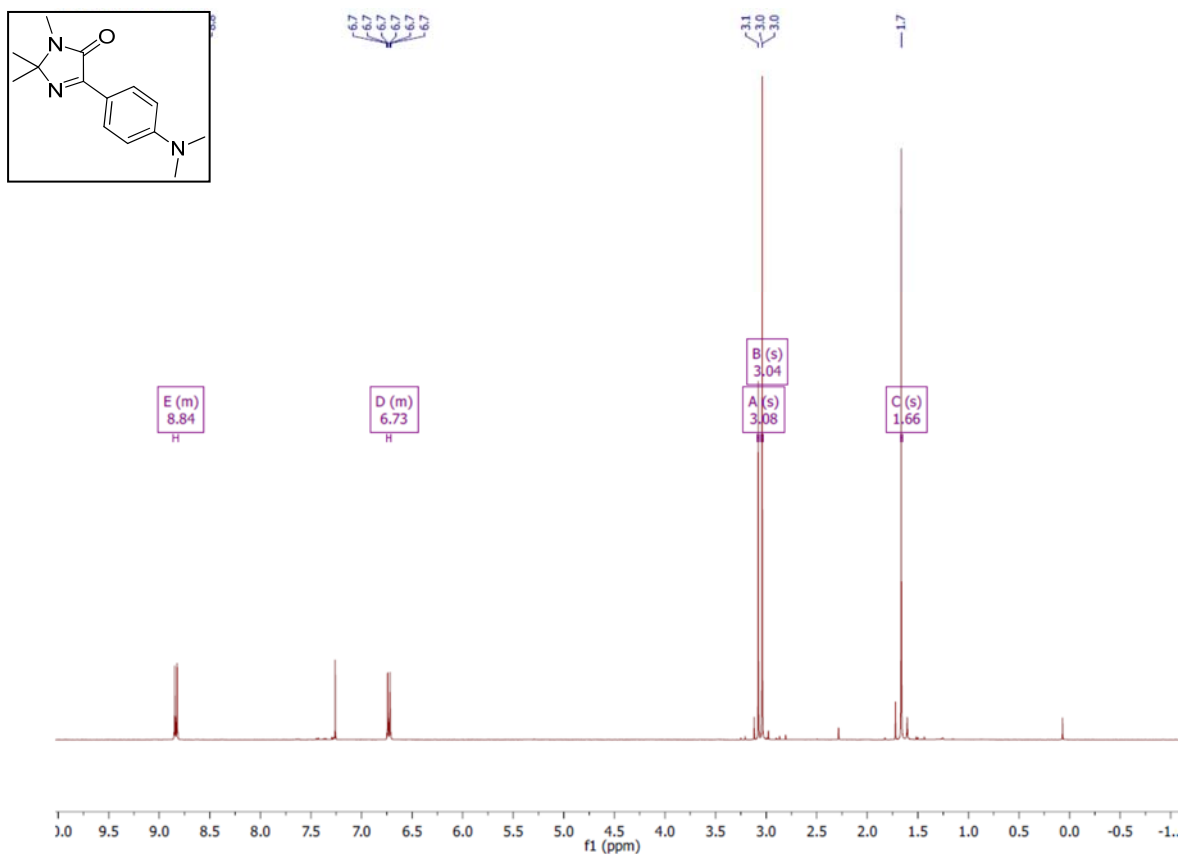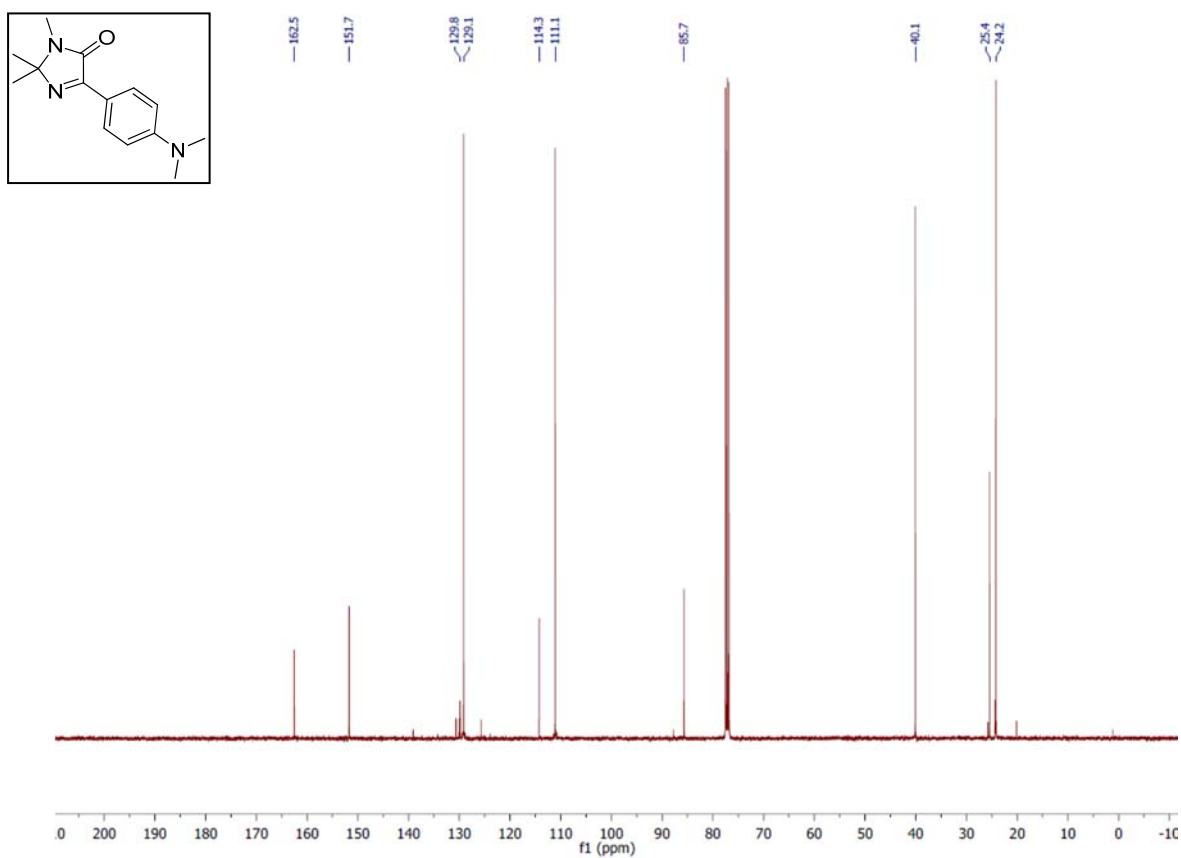

### 4-Hexyl-1,2,2-trimethyl-1*H*-imidazol-5(2*H*)-one (1j)

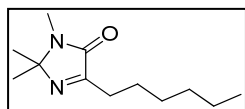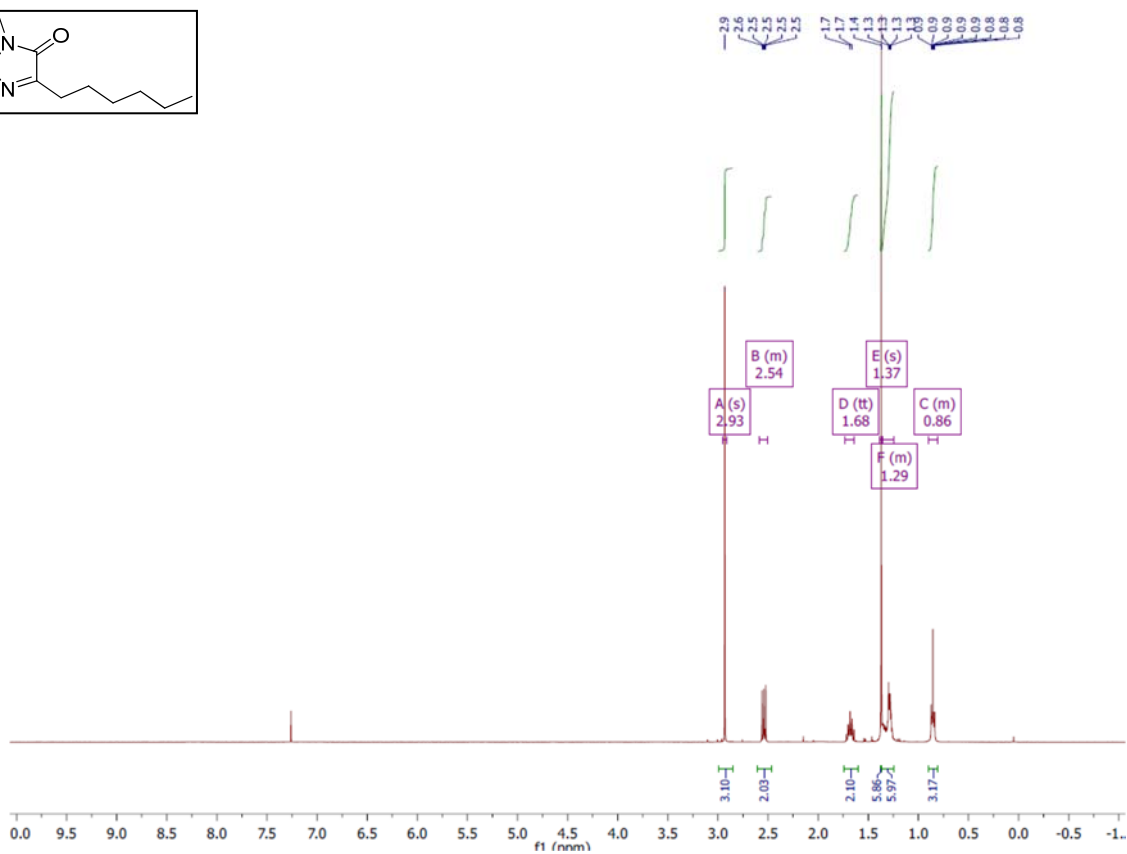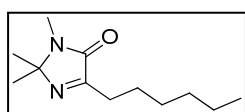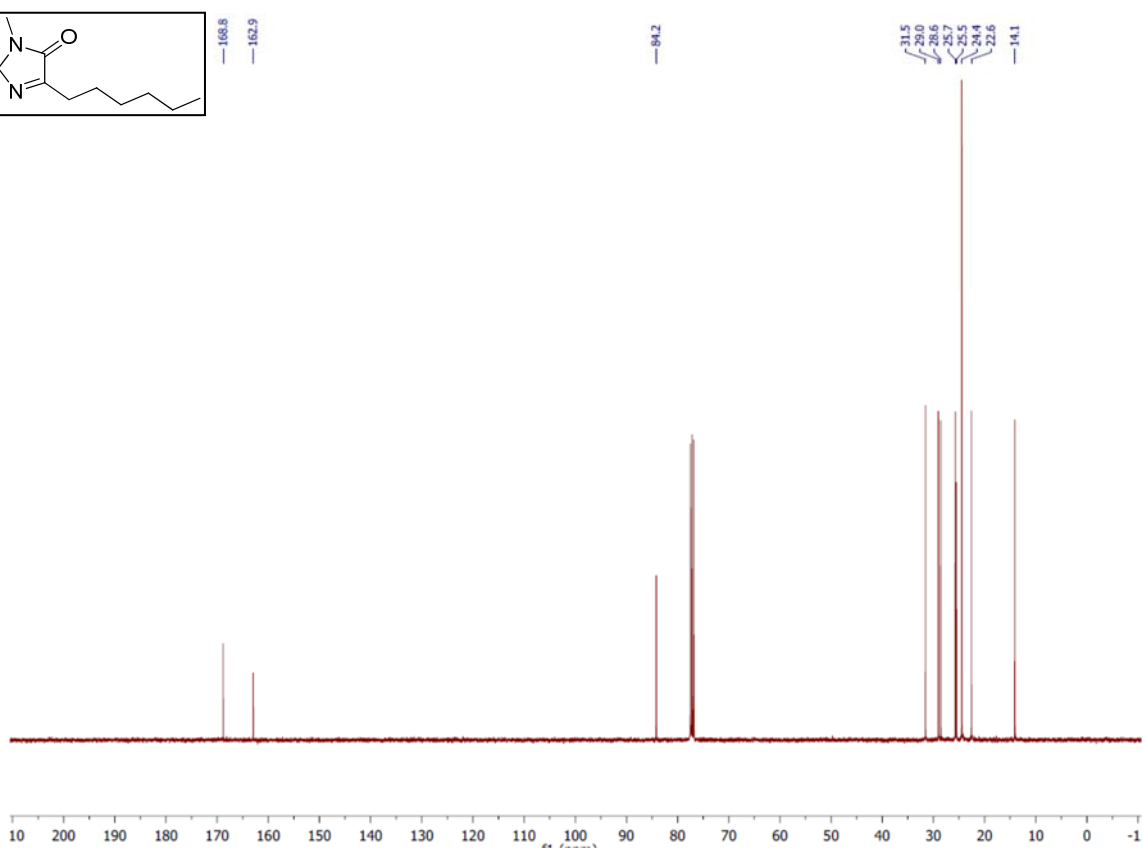

### 4-Isobutyl-1,2,2-trimethyl-1*H*-imidazol-5(2*H*)-one (1k)

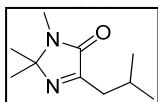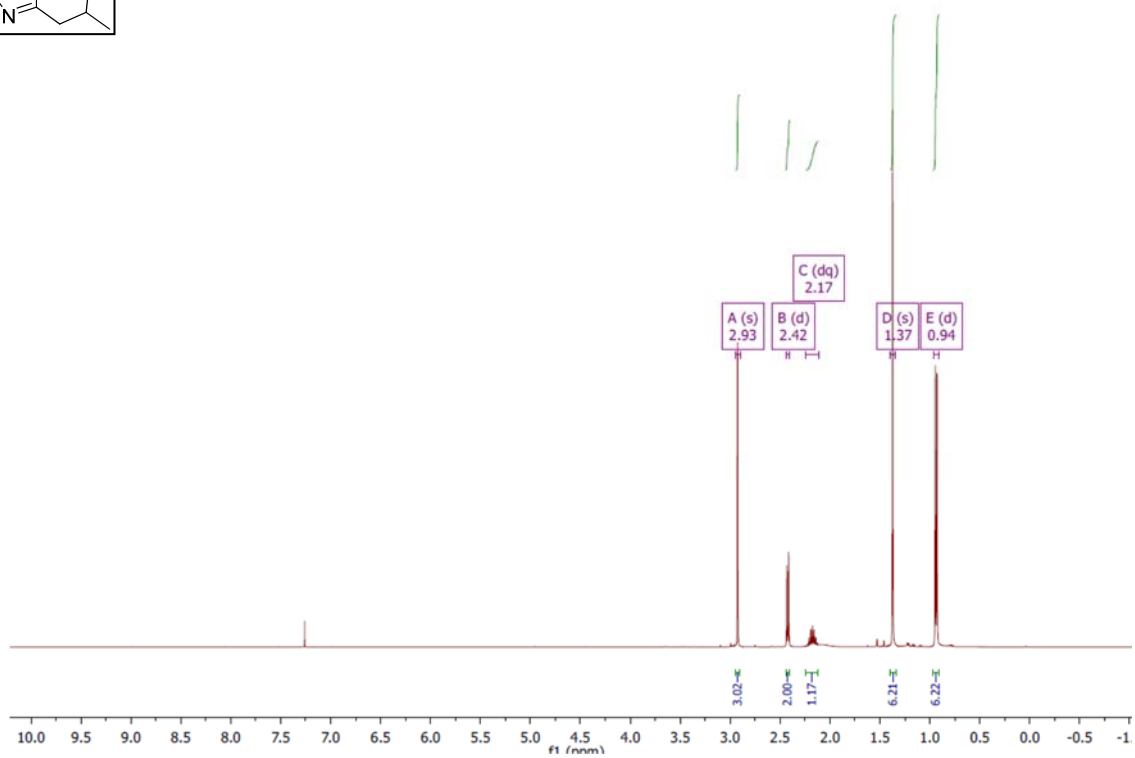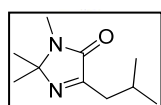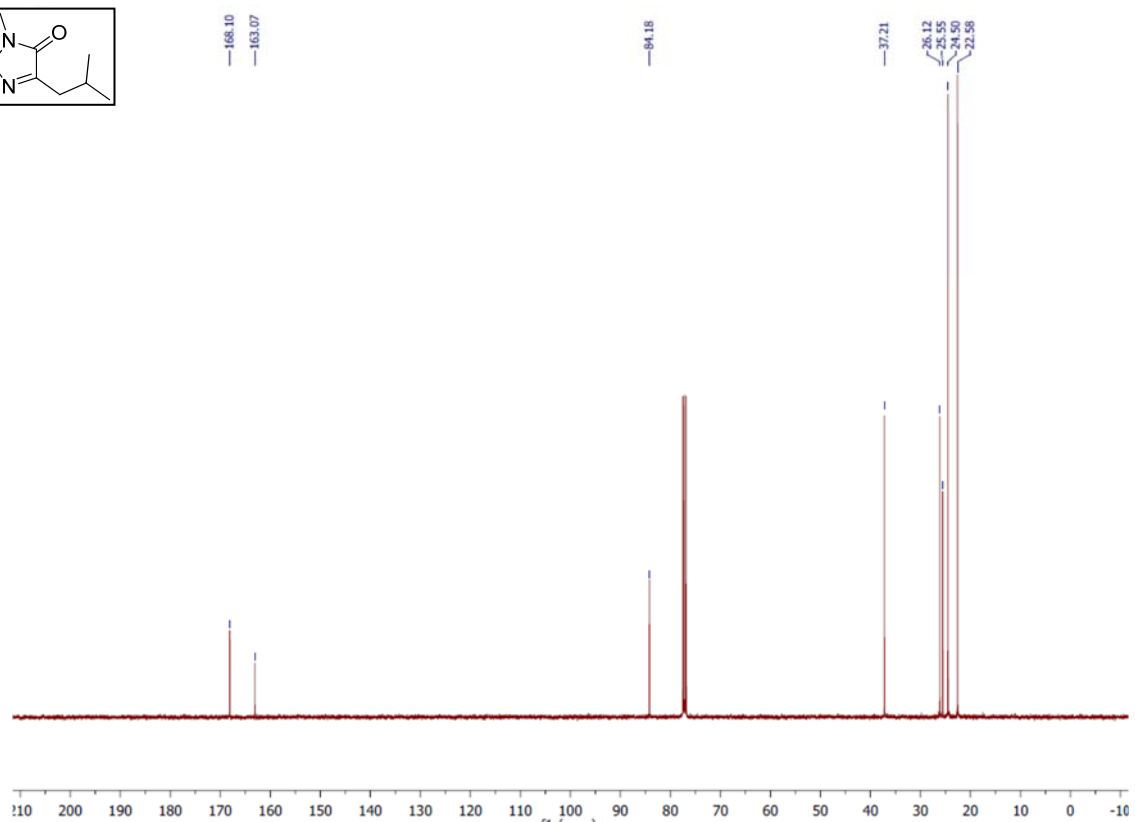

# 4-Benzyl-1,2,2-trimethyl-1H-imidazol-5(2H)-one (11)

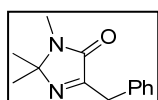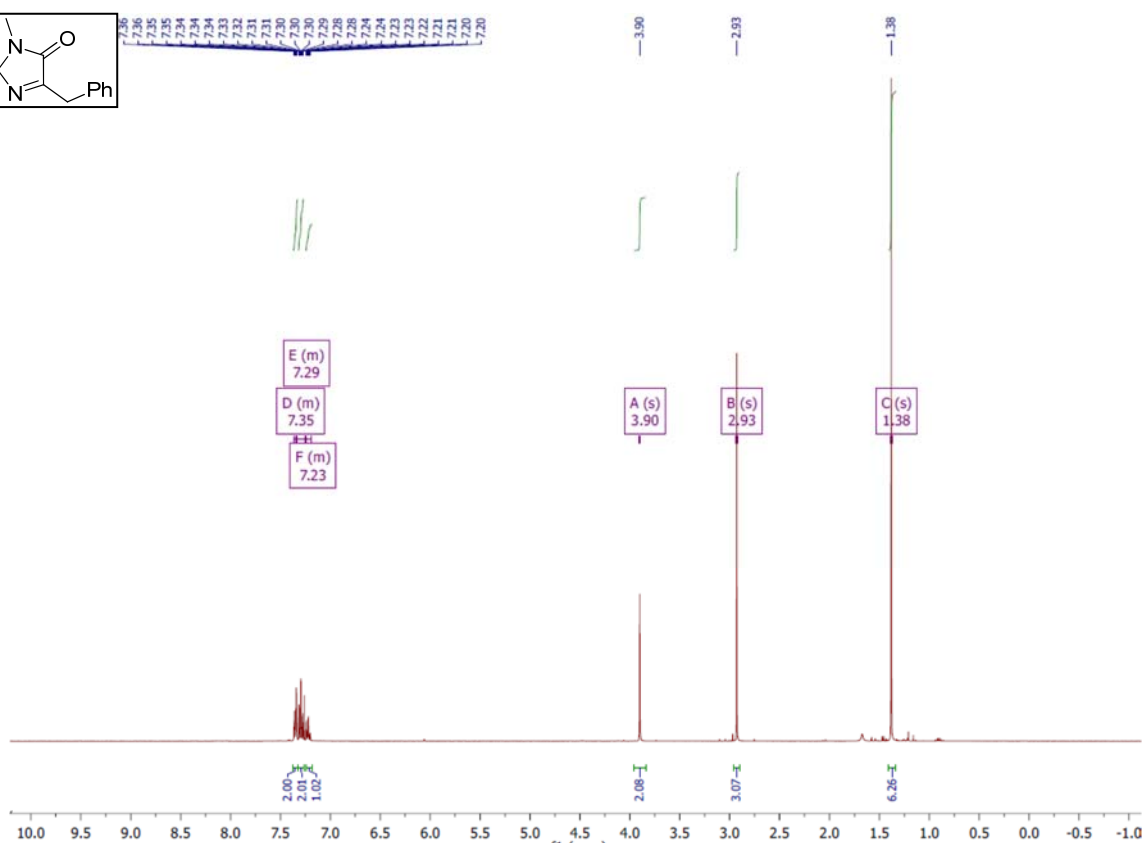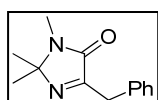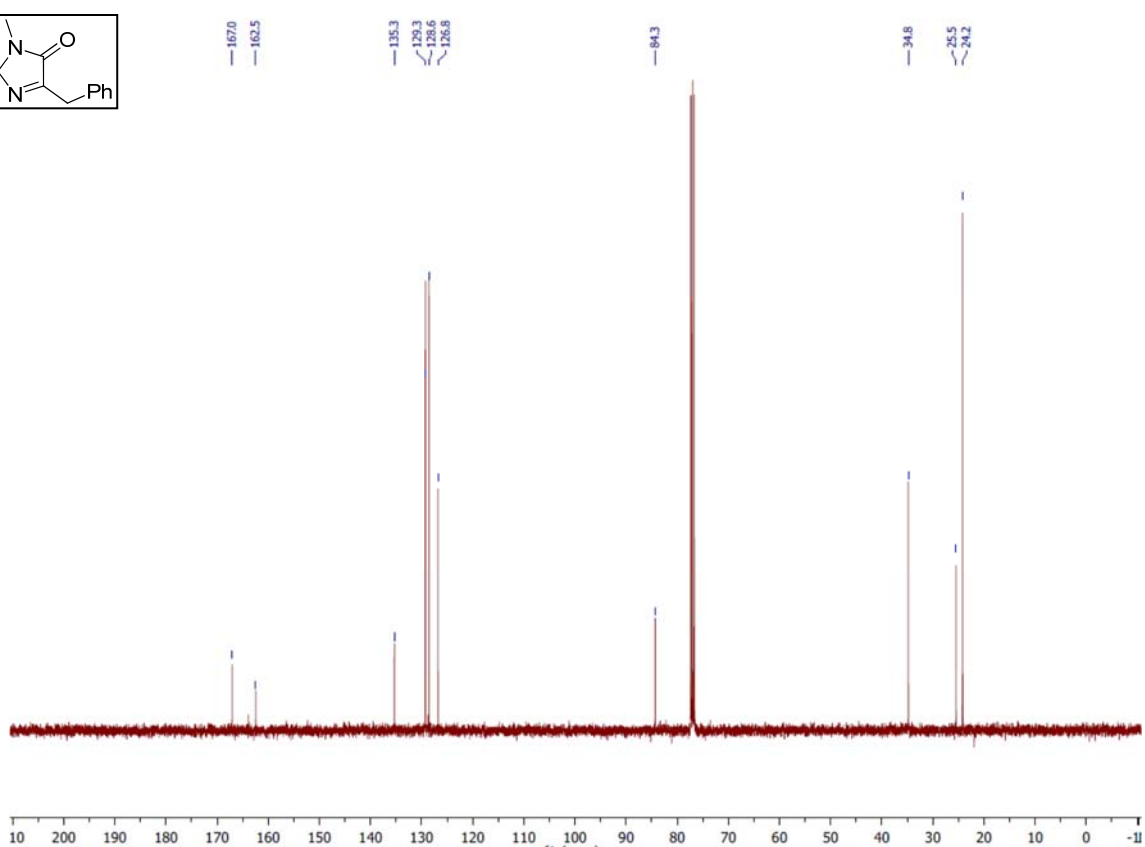

### 4-Isopropyl-1,2,2-trimethyl-1H-imidazol-5(2H)-one (1m)

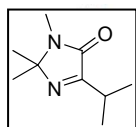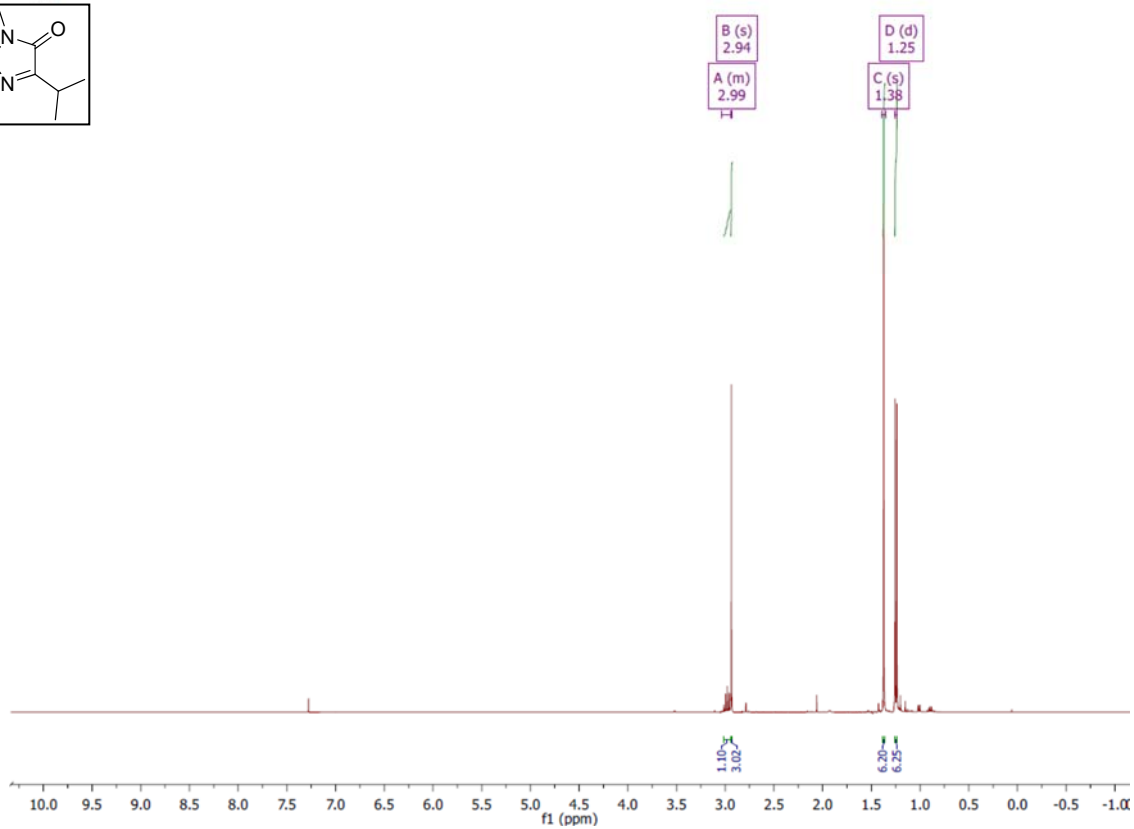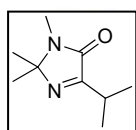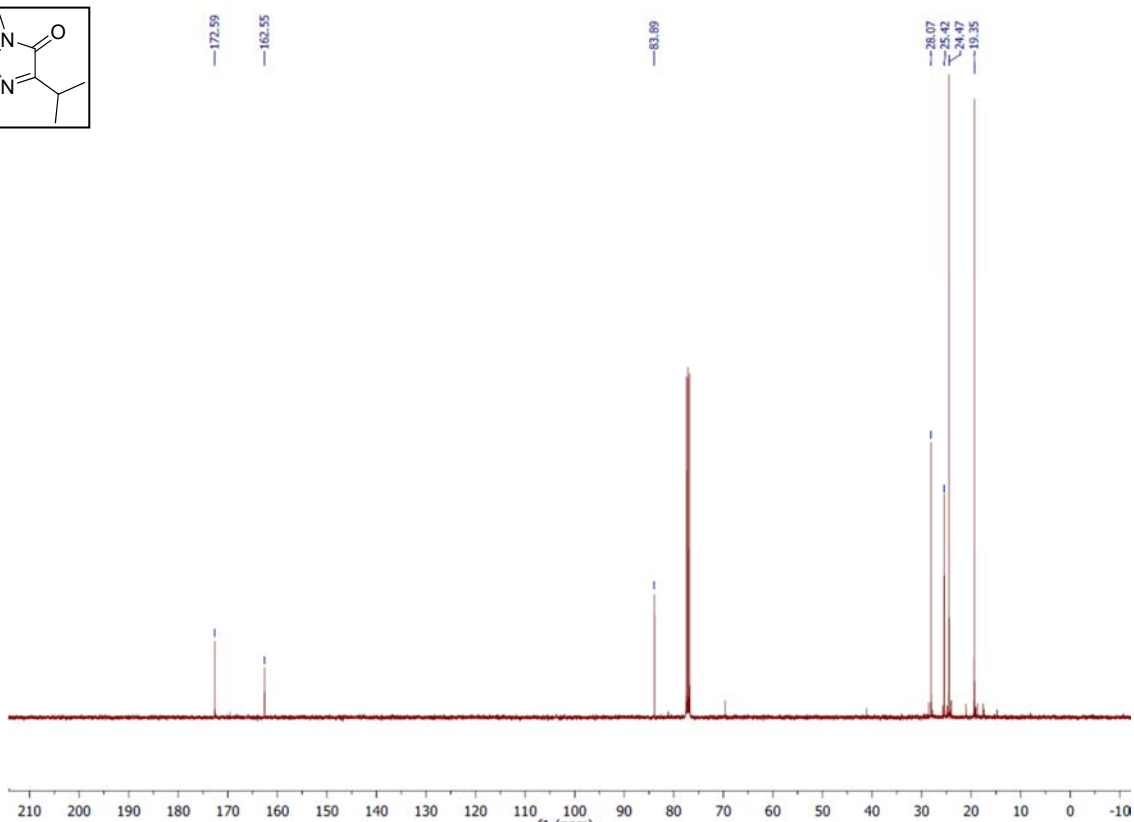

### 4-Cyclohexyl-1,2,2-trimethyl-1*H*-imidazol-5(2*H*)-one (1n)

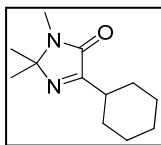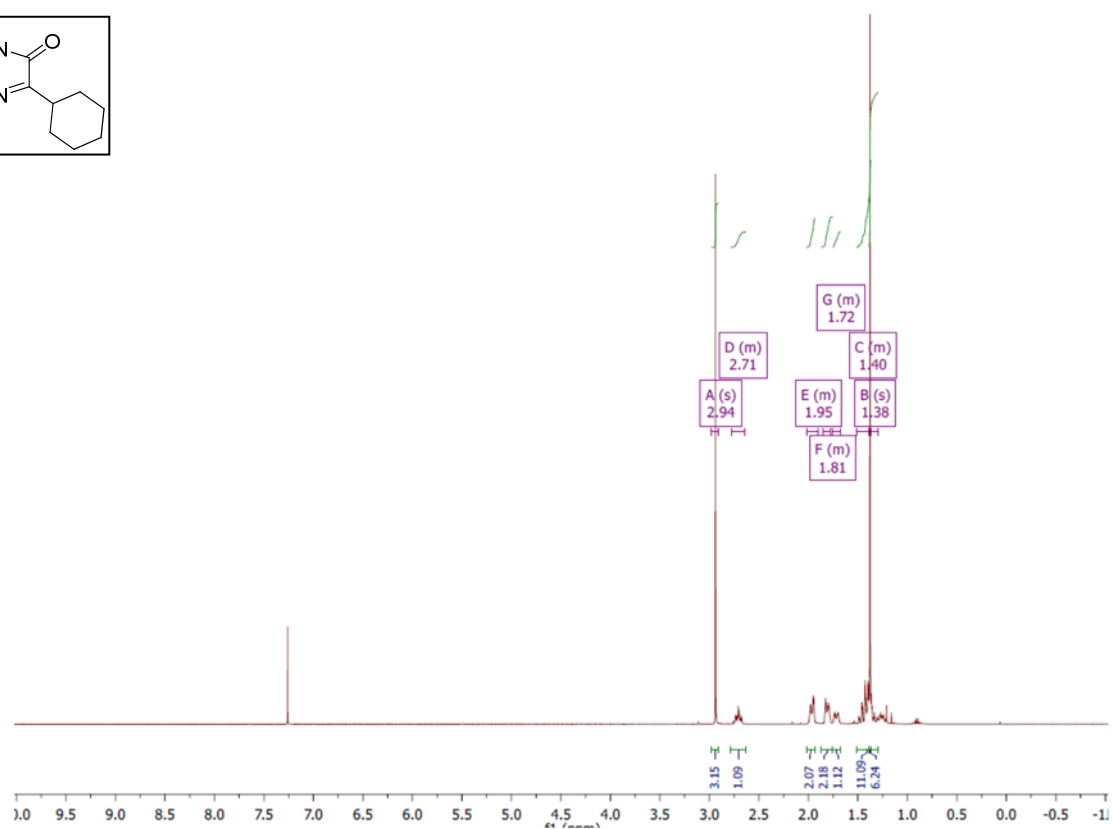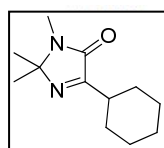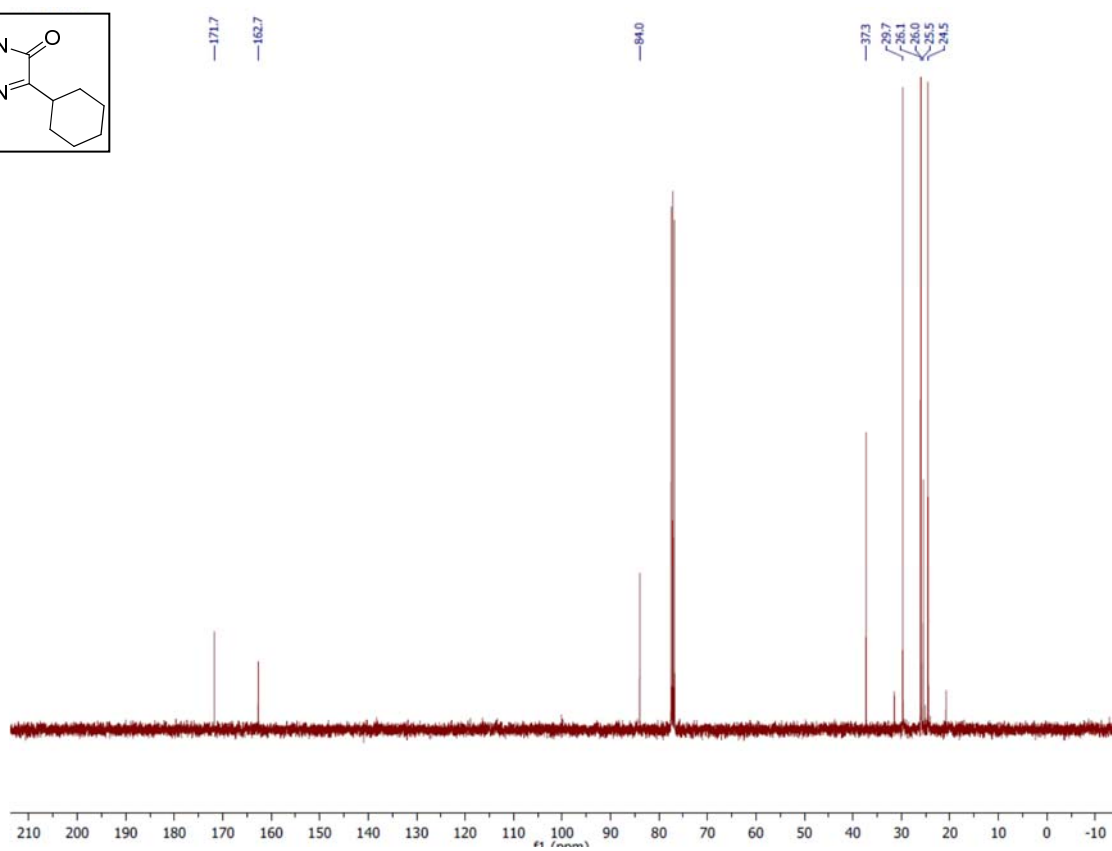



**((2*R*,2'*R*)-1'-(2-hydroxybenzyl)-[2,2'-bipyrrolidin]-1-yl)(pyridin-2-yl)methanon  
(Catalyst E)**

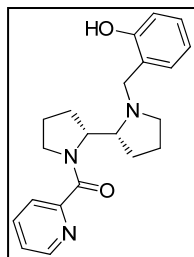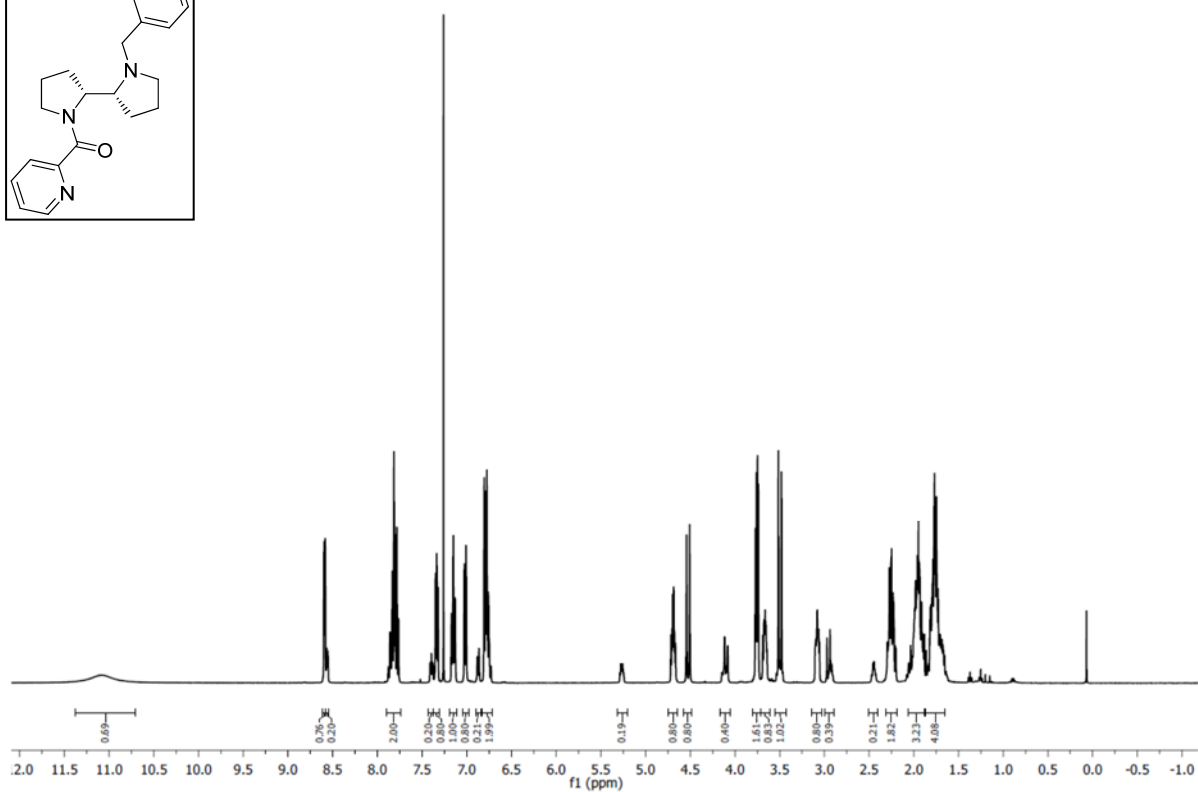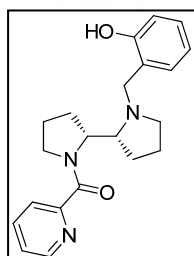

Chemical shifts (ppm) for <sup>13</sup>C NMR spectrum:

- 167.38
- 157.74
- 154.57
- 148.22
- 136.89
- 128.64
- 128.28
- 124.95
- 124.18
- 119.18
- 115.88
- 63.72
- 58.76
- 58.24
- 54.60
- 51.13
- 25.62
- 25.37
- 25.19
- 23.30

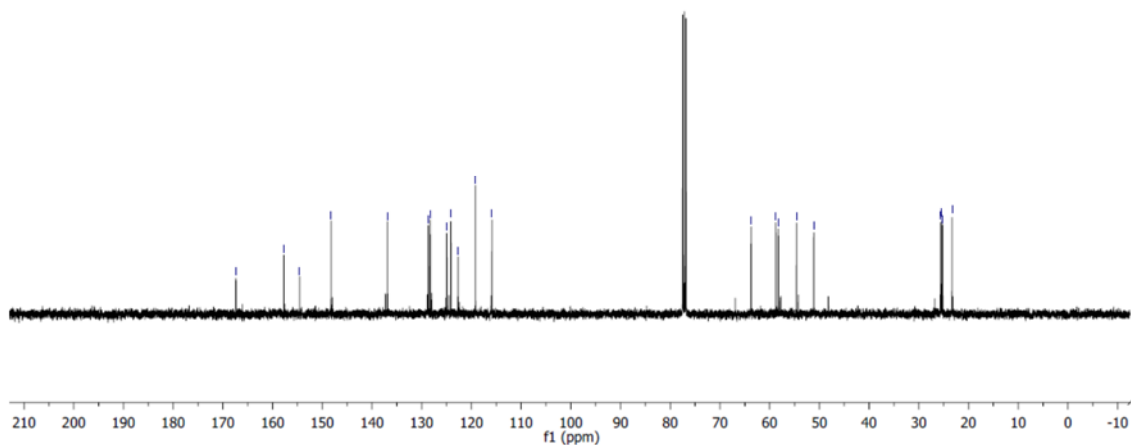

**(R)-2,2,3-Trimethyl-5-phenylimidazolidin-4-on (2a)**

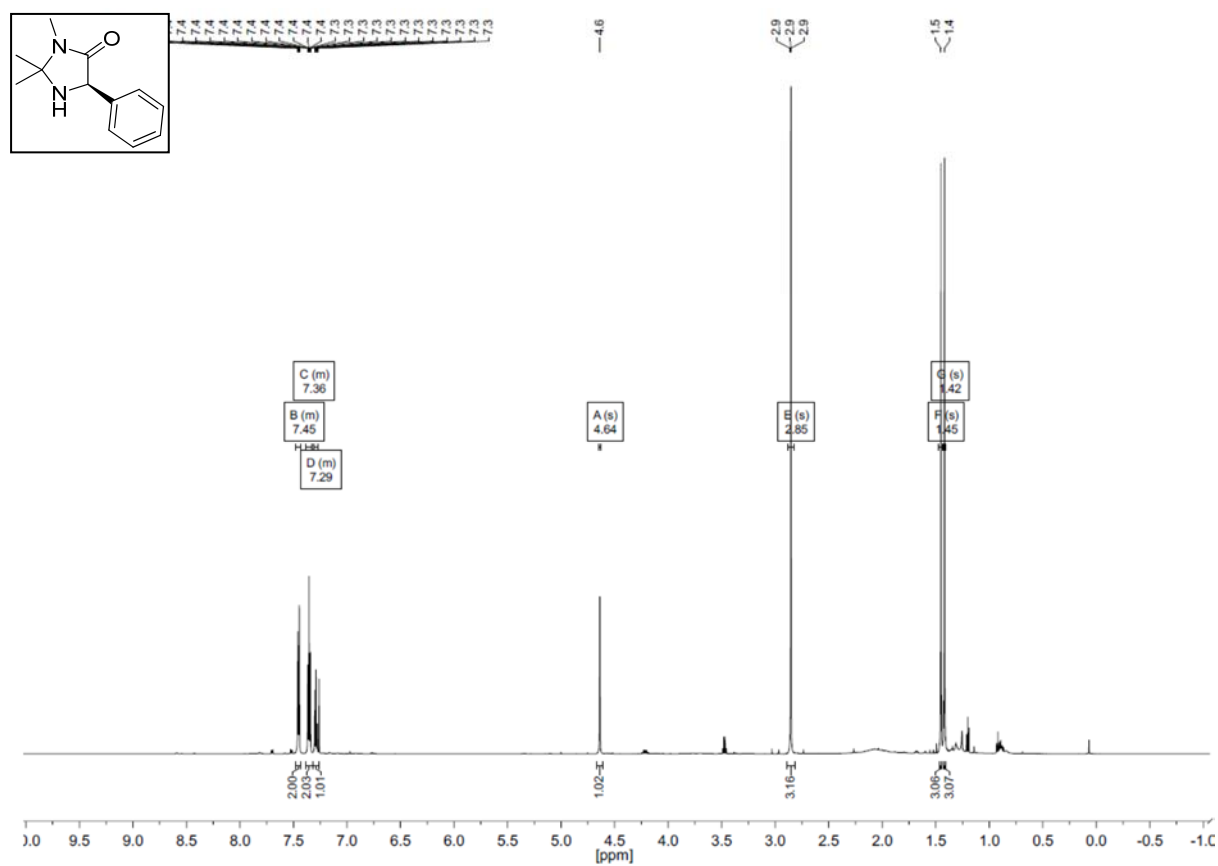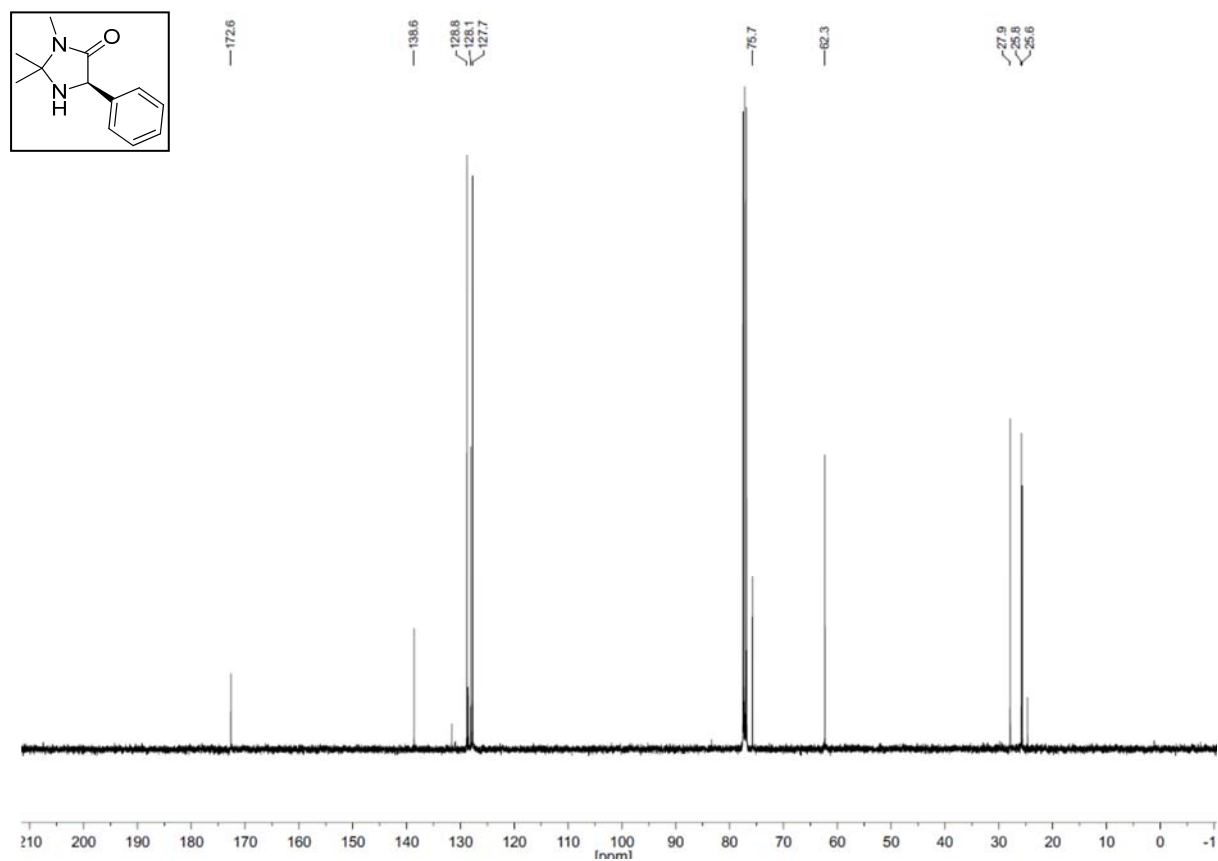

Method Info : Heptan:Ethanol 90 : 10 Flow: 1ml/ min Det:254nm

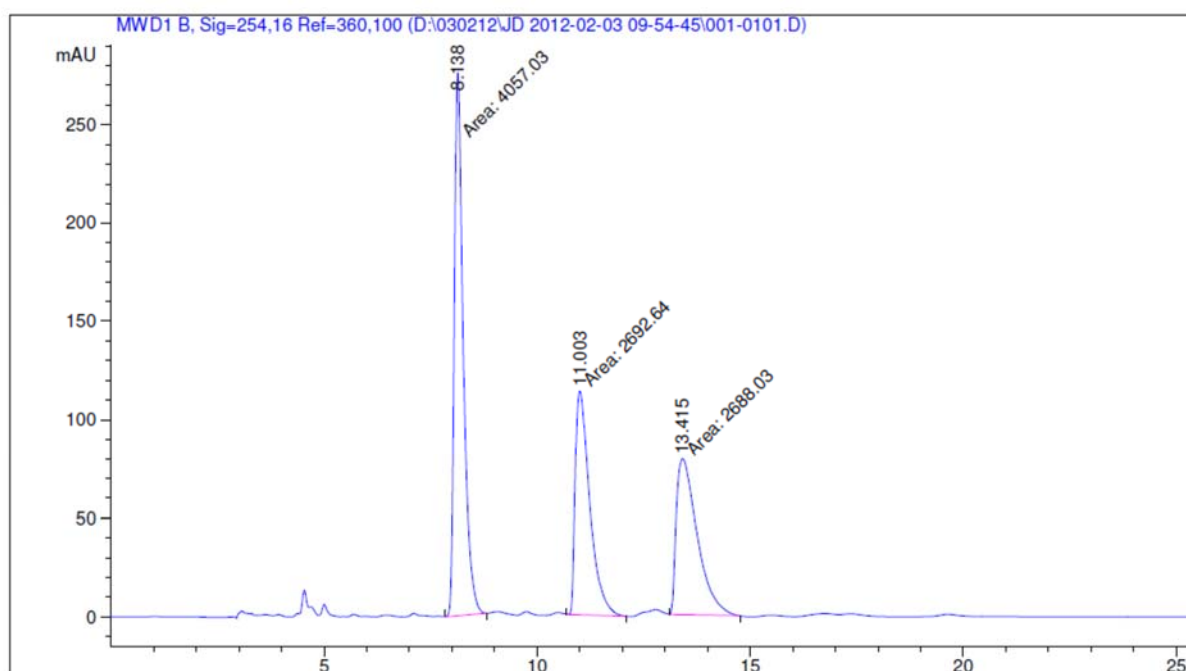

| Peak # | RetTime [min] | Type | Width [min] | Area [mAU*s] | Height [mAU] | Area %  |
|--------|---------------|------|-------------|--------------|--------------|---------|
| 1      | 8.138         | MM   | 0.2439      | 4057.02783   | 277.26544    | 42.9875 |
| 2      | 11.003        | MM   | 0.3945      | 2692.63745   | 113.75210    | 28.5307 |
| 3      | 13.415        | MM   | 0.5688      | 2688.03418   | 78.76353     | 28.4819 |

## 0.1 mmol-Scale

Method Info : Heptan:EtOH 90:10 Flow: 1.0 ml/ min Det: 220 nm

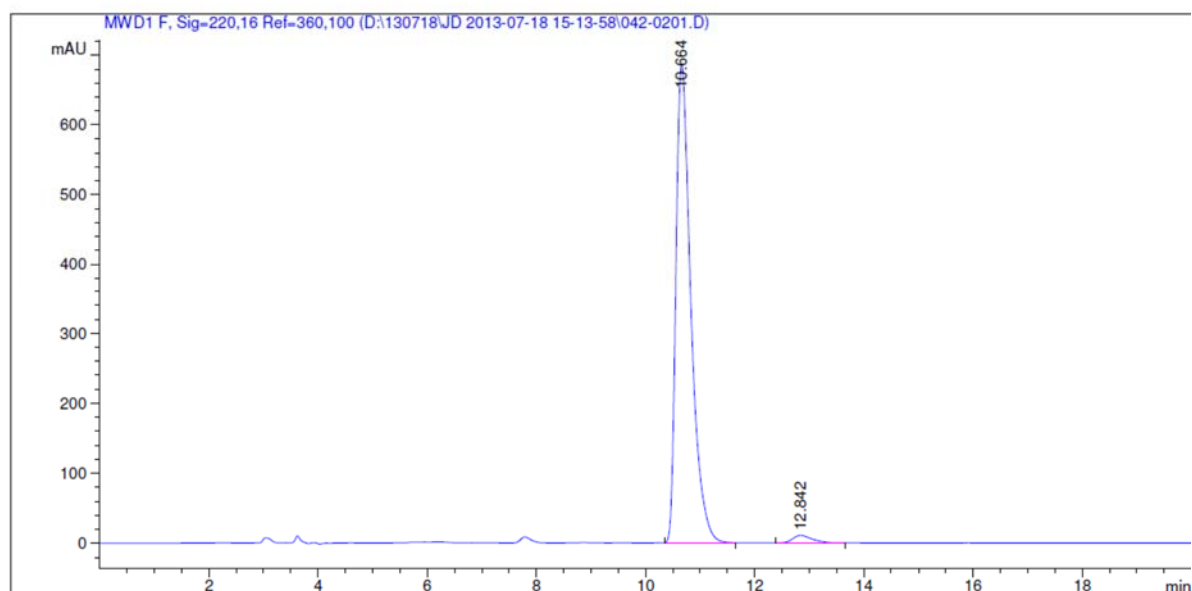

| Peak # | RetTime [min] | Type | Width [min] | Area [mAU*s] | Height [mAU] | Area %  |
|--------|---------------|------|-------------|--------------|--------------|---------|
| 1      | 10.664        | BB   | 0.2855      | 1.30277e4    | 686.26837    | 97.9068 |
| 2      | 12.842        | BB   | 0.3872      | 278.53149    | 10.86046     | 2.0932  |

# 1.0 mmol-Scale

Method Info : Heptan: IPA 90:10 Flow 1.0 ml/min Det:220 nm

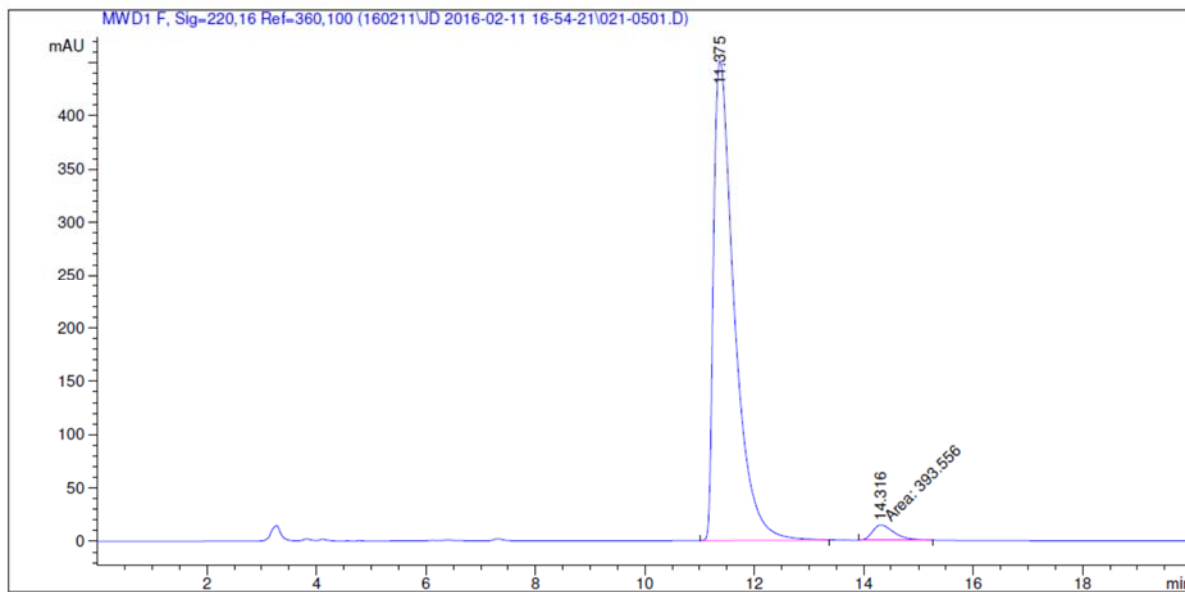

| Peak # | RetTime [min] | Type | Width [min] | Area [mAU*s] | Height [mAU] | Area %  |
|--------|---------------|------|-------------|--------------|--------------|---------|
| 1      | 11.375        | BB   | 0.3958      | 1.18155e4    | 450.81653    | 96.7765 |
| 2      | 14.316        | MM   | 0.4601      | 393.55557    | 14.25506     | 3.2235  |

**(R)-2,2,3-Trimethyl-5-(p-tolyl)imidazolidin-4-on (2b)**

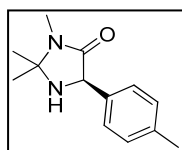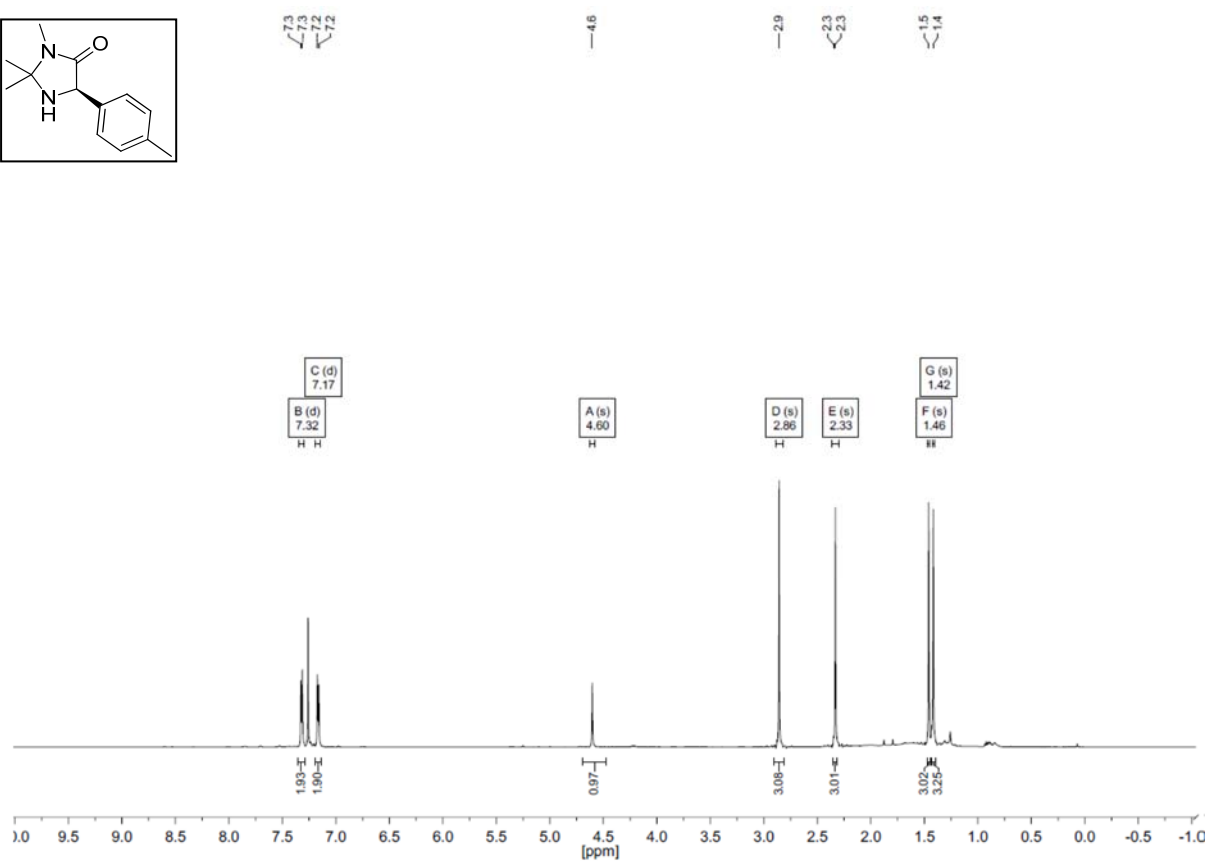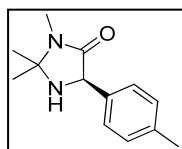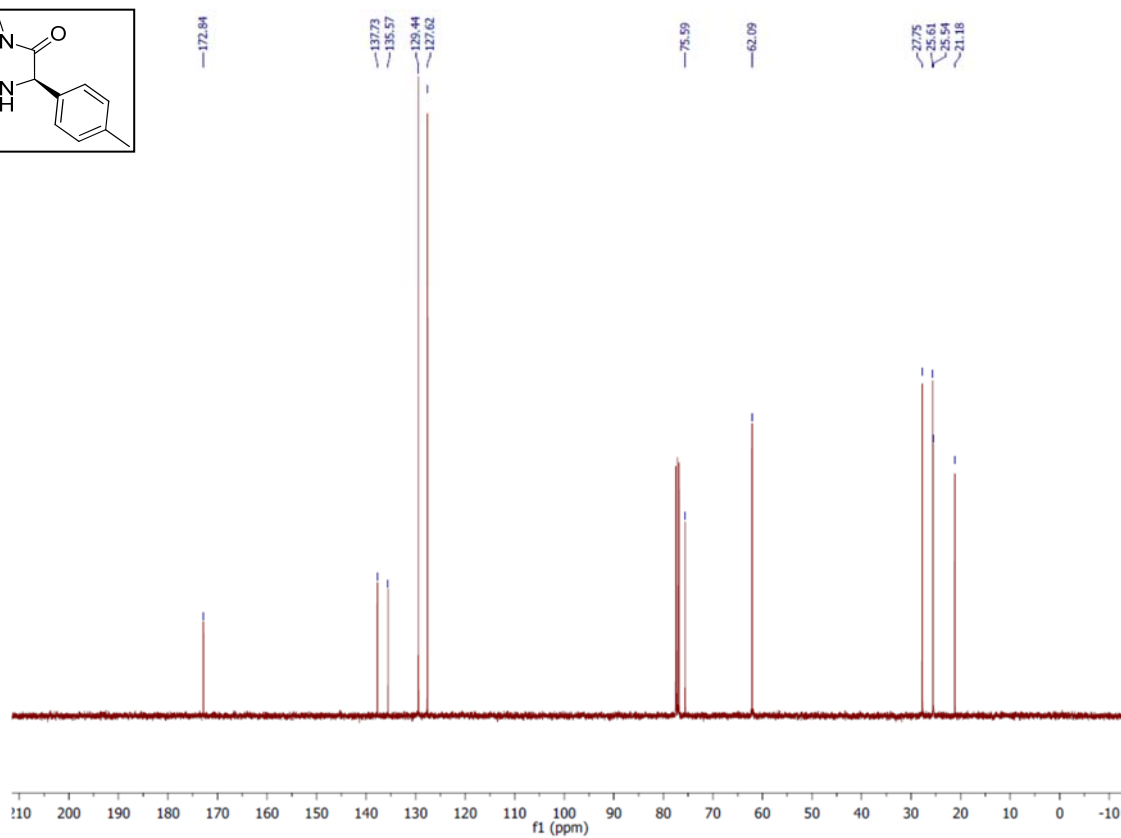

Method Info : Heptan : Ethanol 90:10 Flow 1.0 Det:220m

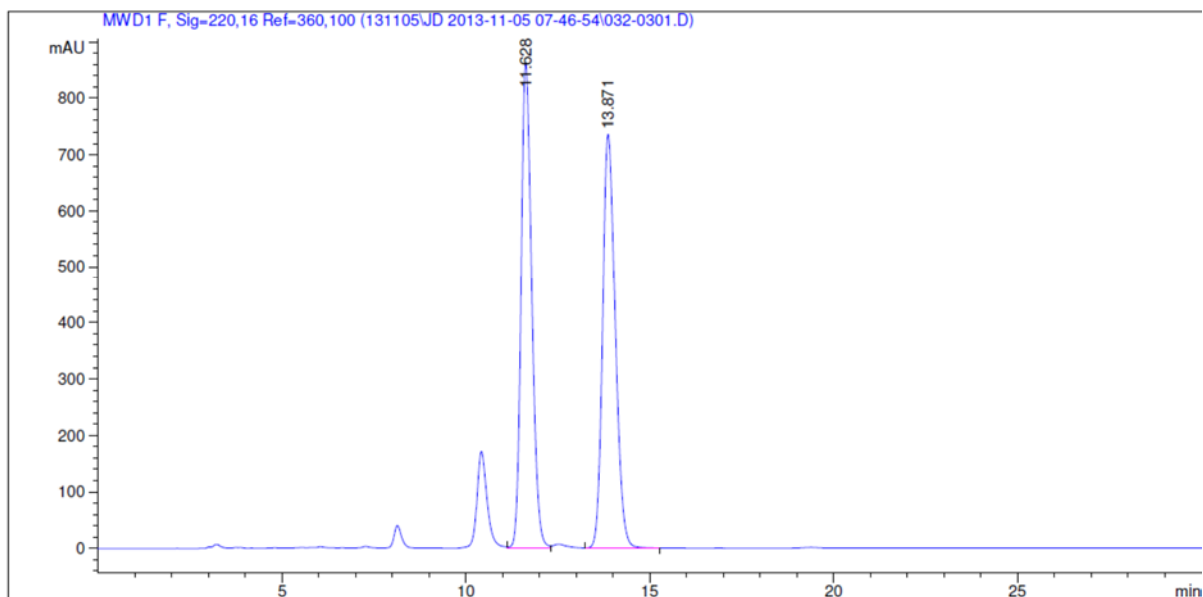

| Peak # | RetTime [min] | Type | Width [min] | Area [mAU*s] | Height [mAU] | Area %  |
|--------|---------------|------|-------------|--------------|--------------|---------|
| 1      | 11.628        | VV   | 0.3126      | 1.74897e4    | 862.54590    | 49.9609 |
| 2      | 13.871        | VB   | 0.3656      | 1.75171e4    | 736.06885    | 50.0391 |

Method Info : Heptan 90:10 Flow 1.0 220 nm 20 min

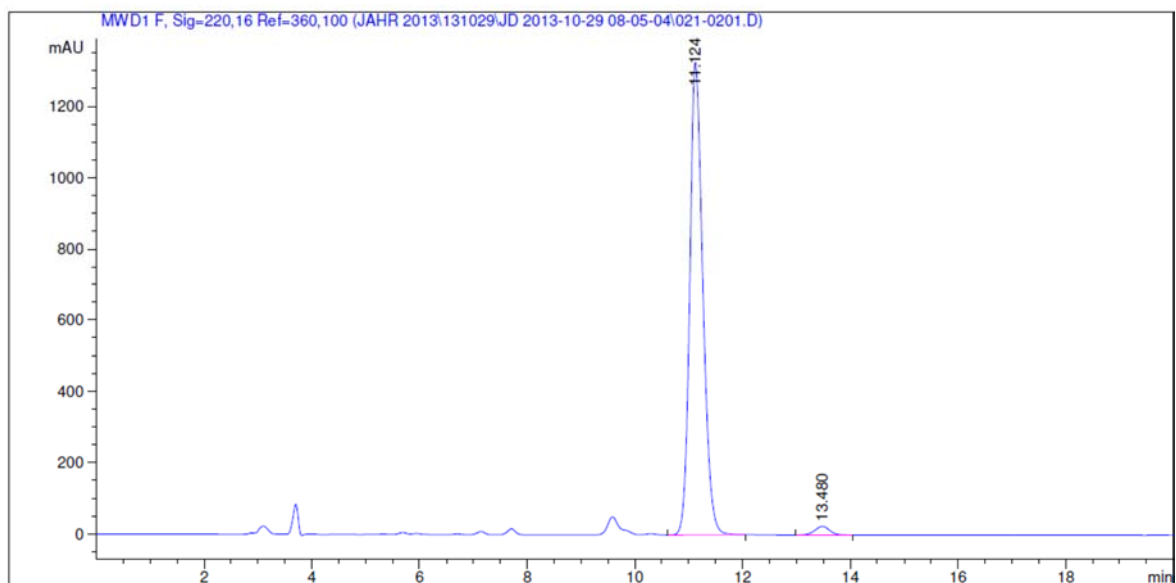

| Peak # | RetTime [min] | Type | Width [min] | Area [mAU*s] | Height [mAU] | Area %  |
|--------|---------------|------|-------------|--------------|--------------|---------|
| 1      | 11.124        | VB   | 0.2539      | 2.22762e4    | 1326.91541   | 97.9379 |
| 2      | 13.480        | BB   | 0.2952      | 469.02802    | 24.30052     | 2.0621  |

**(R)-2,2,3-Trimethyl-5-(*m*-tolyl)imidazolidin-4-on (2c)**

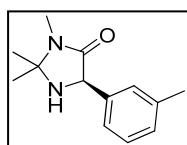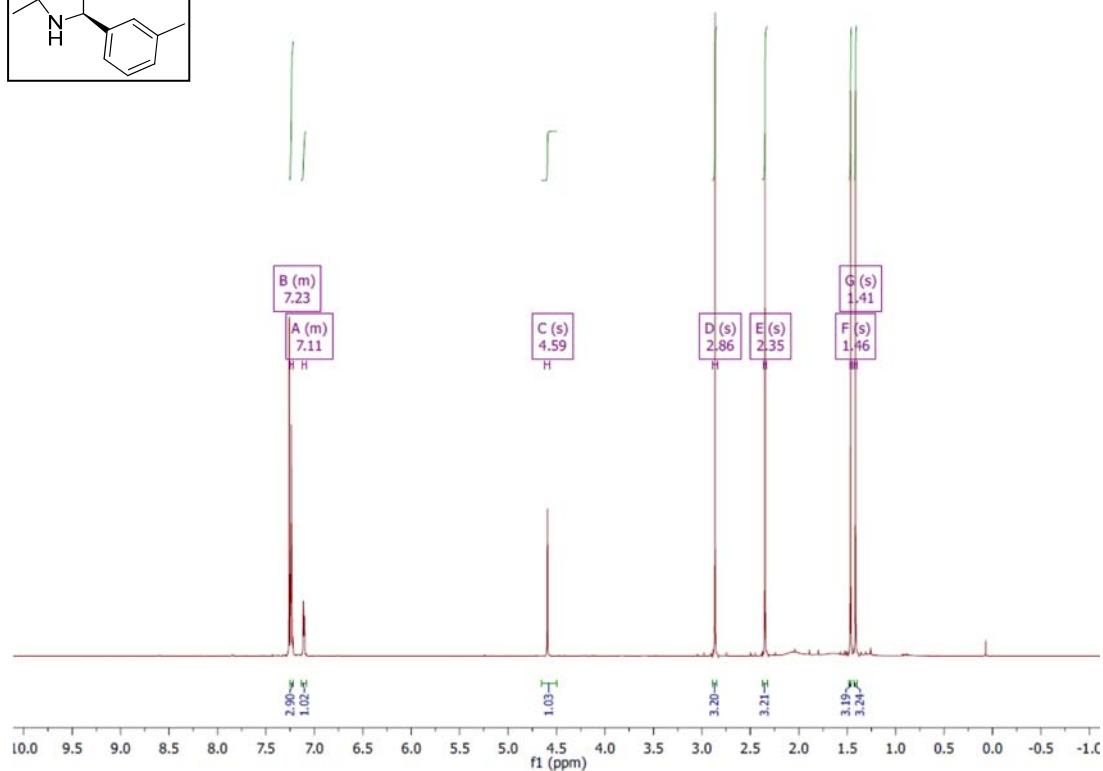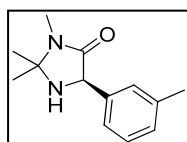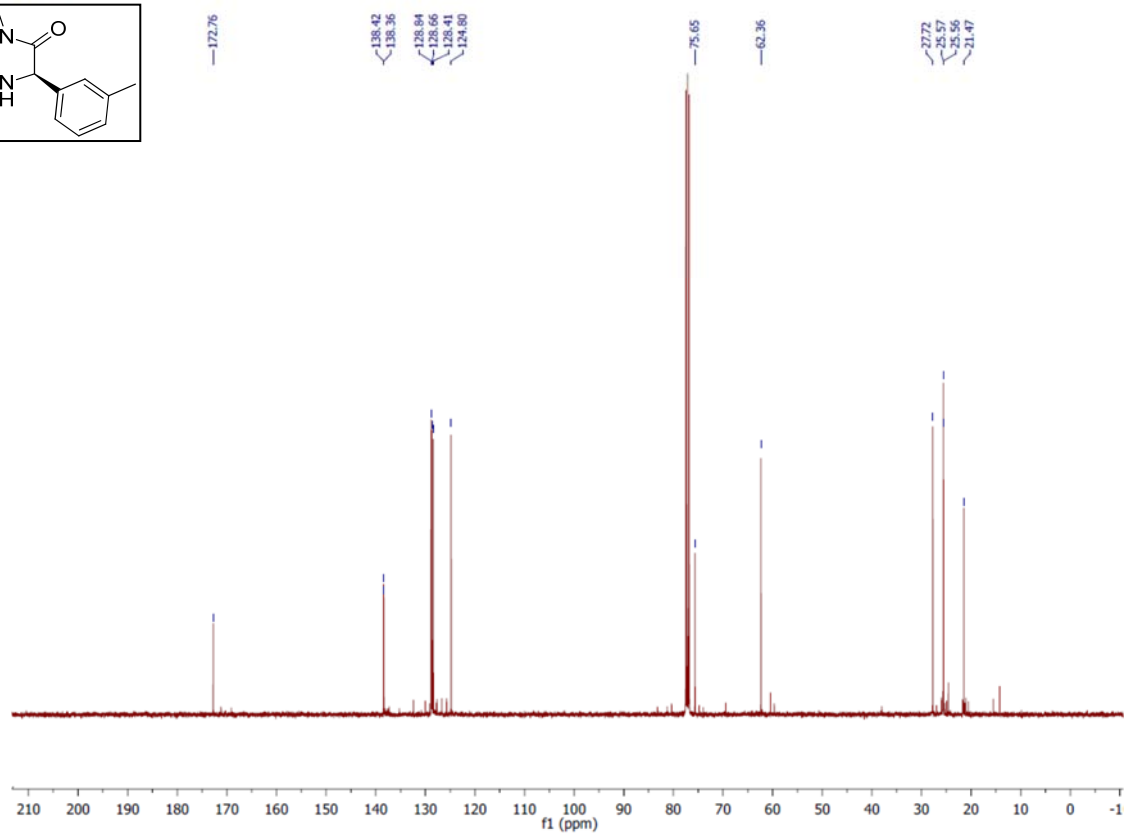

Method Info : Heptan:Ethanol 90:10 Flow: 1 ml/ min Det: 220 nm

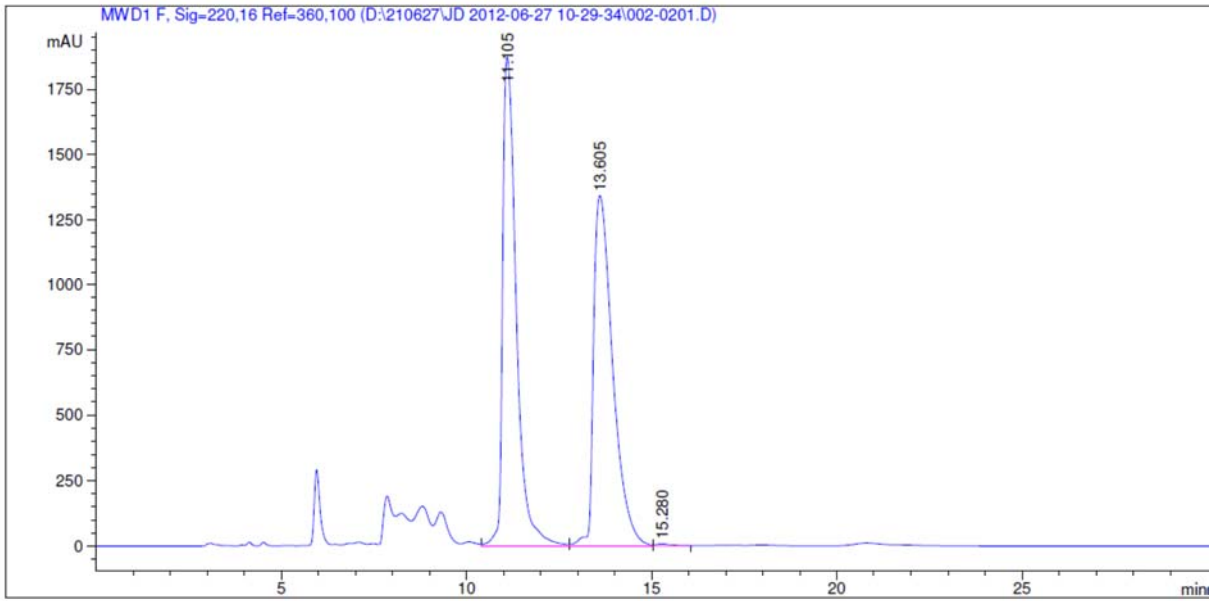

| Peak # | RetTime [min] | Type | Width [min] | Area [mAU*s] | Height [mAU] | Area %  |
|--------|---------------|------|-------------|--------------|--------------|---------|
| 1      | 11.105        | VV   | 0.3935      | 4.76814e4    | 1870.01672   | 49.5836 |
| 2      | 13.605        | VV   | 0.5558      | 4.82680e4    | 1341.36841   | 50.1937 |
| 3      | 15.280        | VB   | 0.4161      | 214.13055    | 7.61512      | 0.2227  |

Method Info : Heptan Ethanol 90:10 Flow: 1 ml/ min Det: 220 20grad C

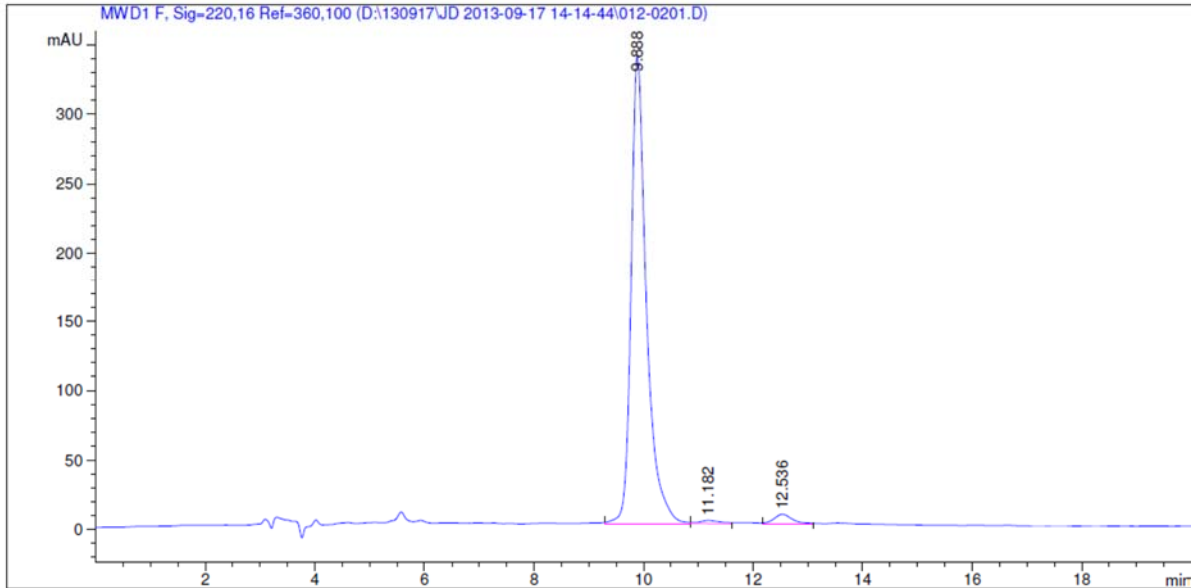

| Peak # | RetTime [min] | Type | Width [min] | Area [mAU*s] | Height [mAU] | Area %  |
|--------|---------------|------|-------------|--------------|--------------|---------|
| 1      | 9.888         | BB   | 0.2902      | 6549.67090   | 337.86987    | 96.7819 |
| 2      | 11.182        | BB   | 0.3820      | 62.21537     | 2.28245      | 0.9193  |
| 3      | 12.536        | BB   | 0.3478      | 155.56520    | 6.77717      | 2.2987  |



**(R)-2,2,3-Trimethyl-5-(*o*-tolyl)imidazolidin-4-on (2d)**

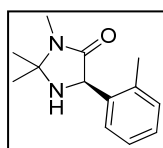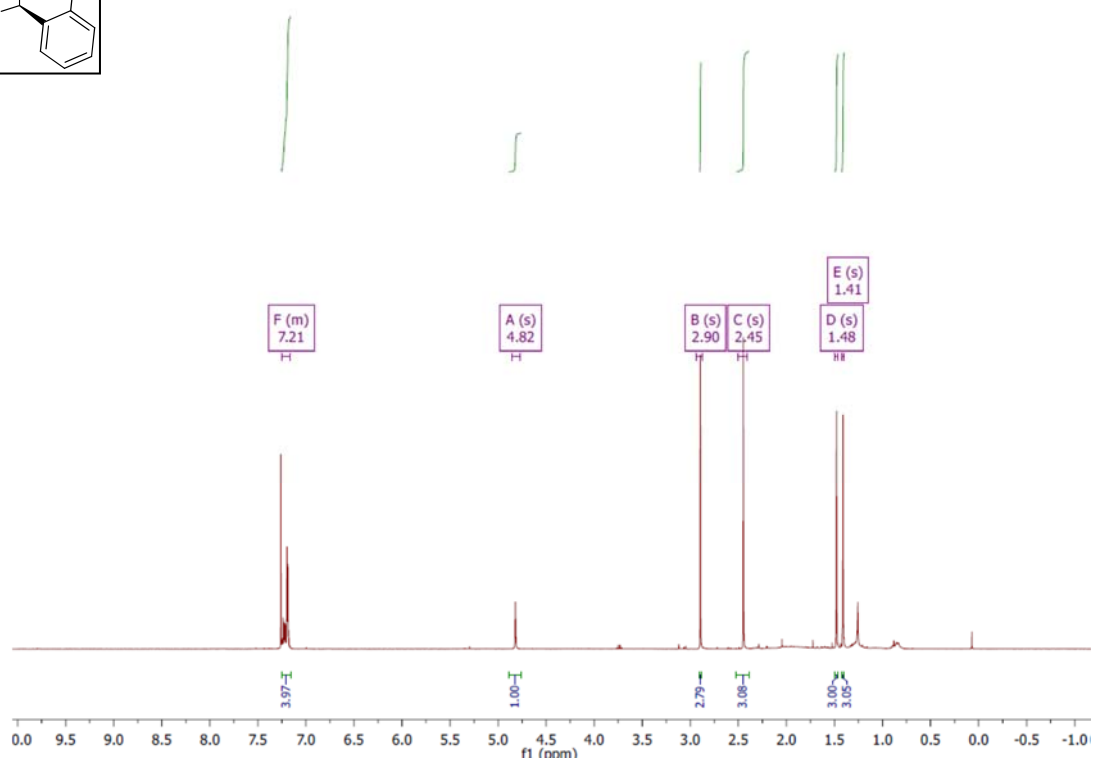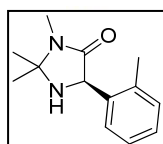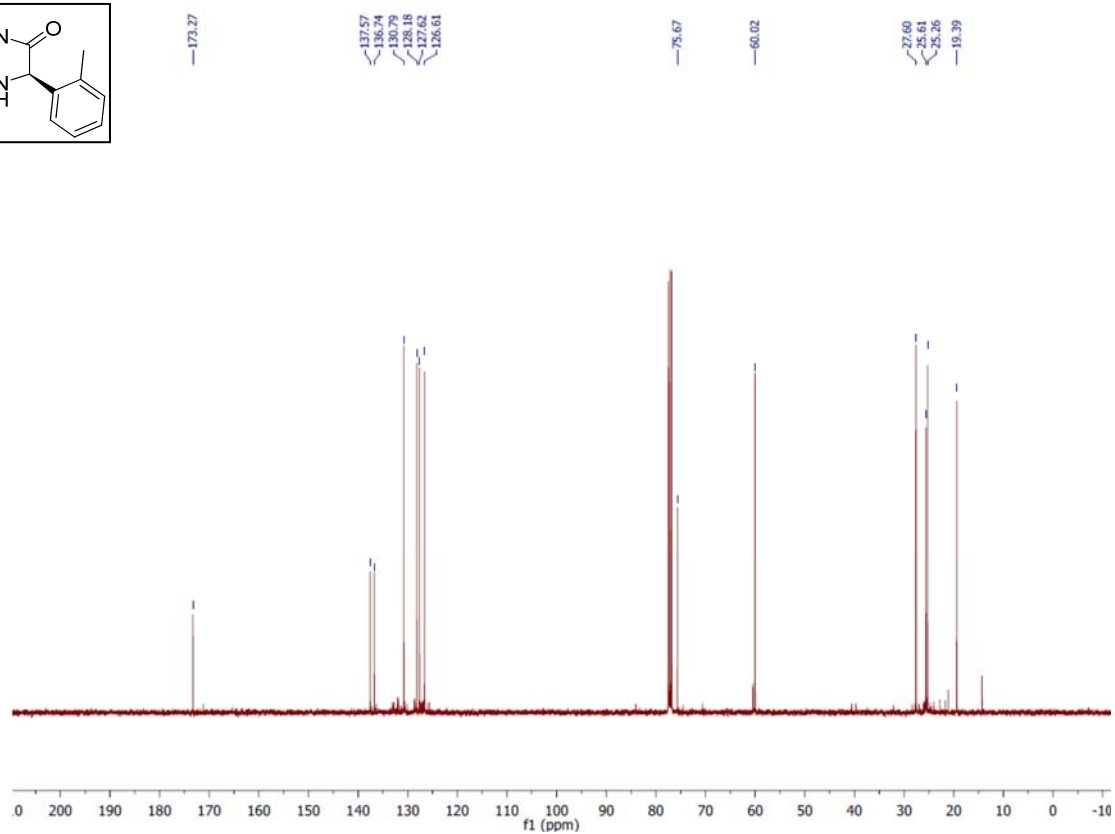

Method Info : Heptan:Ethanol 90:10 Flow: 1 ml/ min Det: 220 nm

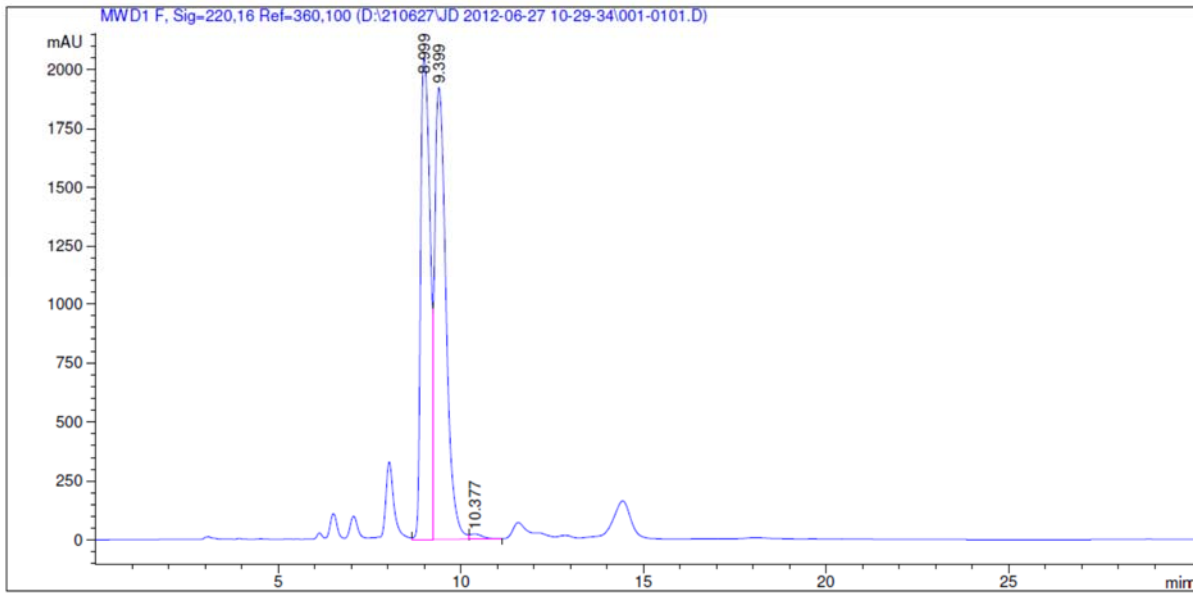

| Peak # | RetTime [min] | Type | Width [min] | Area [mAU*s] | Height [mAU] | Area %  |
|--------|---------------|------|-------------|--------------|--------------|---------|
| 1      | 8.999         | VV   | 0.2871      | 3.62846e4    | 2043.74023   | 46.5347 |
| 2      | 9.399         | VV   | 0.3301      | 4.10889e4    | 1916.50024   | 52.6963 |
| 3      | 10.377        | VV   | 0.3969      | 599.60529    | 22.07314     | 0.7690  |

Method Info : Heptan > Ethanol 90:10 Flow 1.0 220 nm

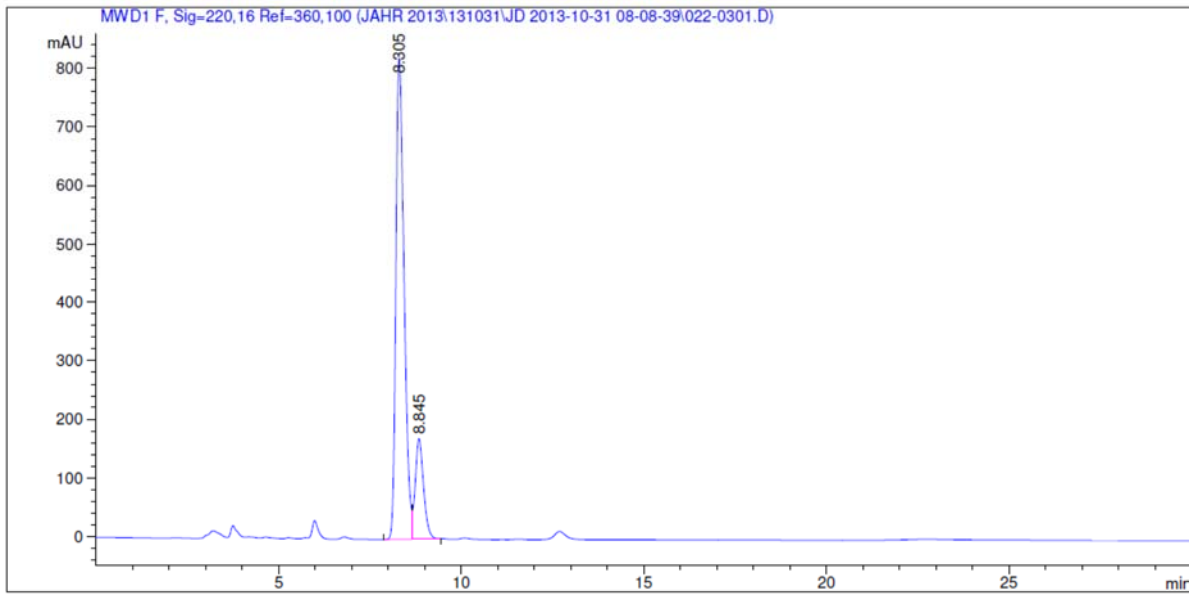

| Peak # | RetTime [min] | Type | Width [min] | Area [mAU*s] | Height [mAU] | Area %  |
|--------|---------------|------|-------------|--------------|--------------|---------|
| 1      | 8.305         | BV   | 0.2356      | 1.26622e4    | 822.40967    | 82.1112 |
| 2      | 8.845         | VB   | 0.2415      | 2758.57886   | 171.60883    | 17.8888 |

**(R)-5-(4-Chlorophenyl)-2,2,3-trimethylimidazolidin-4-on (2e)**

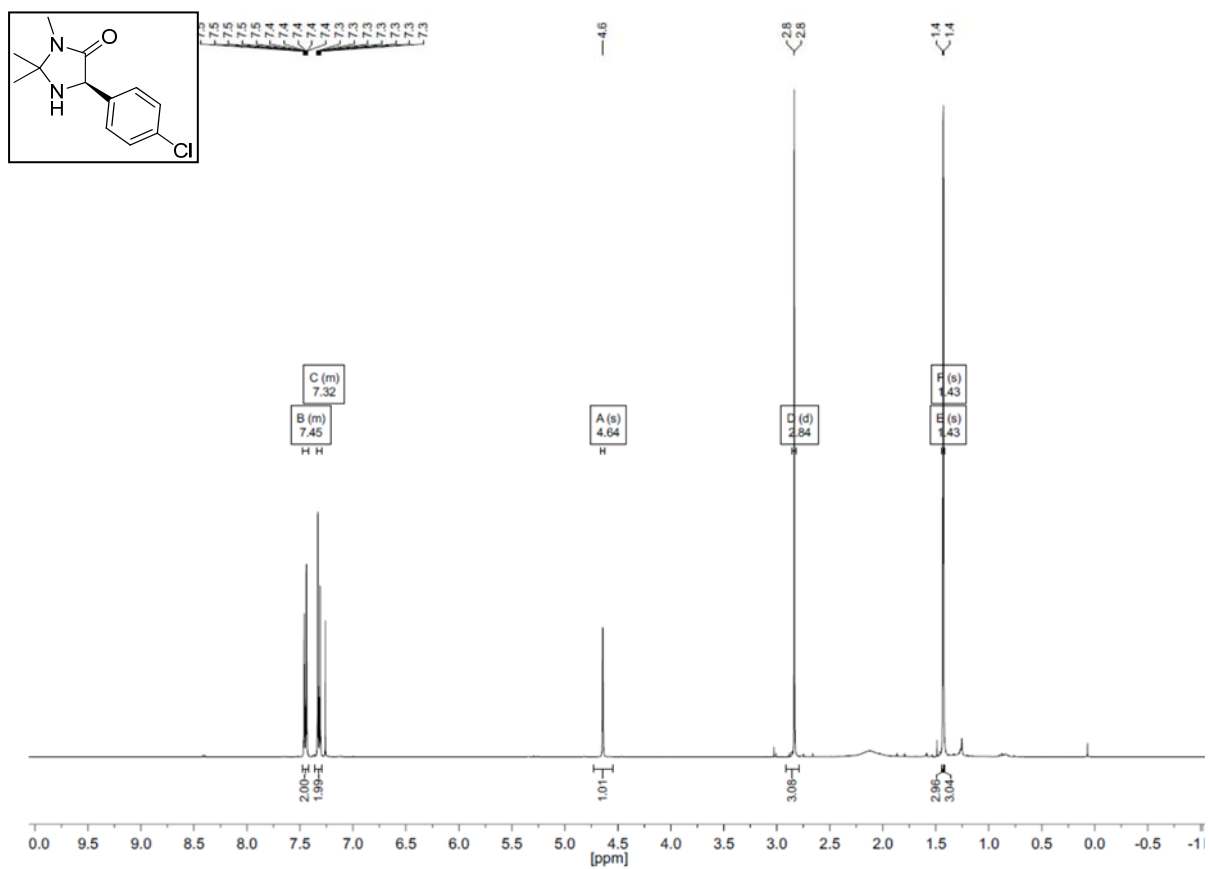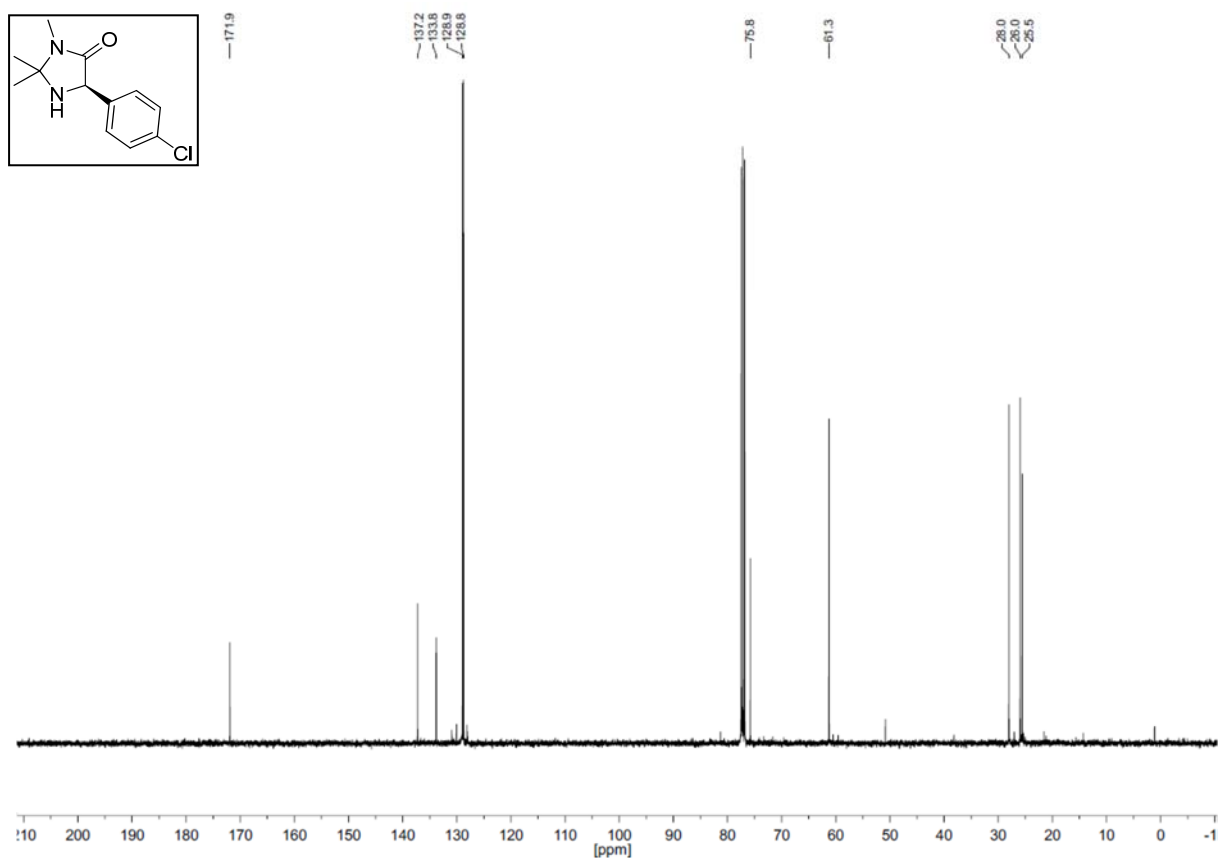

Method Info : Heptan:Ethanol 90:10 Flow: 1 ml/ min Det: 220 nm

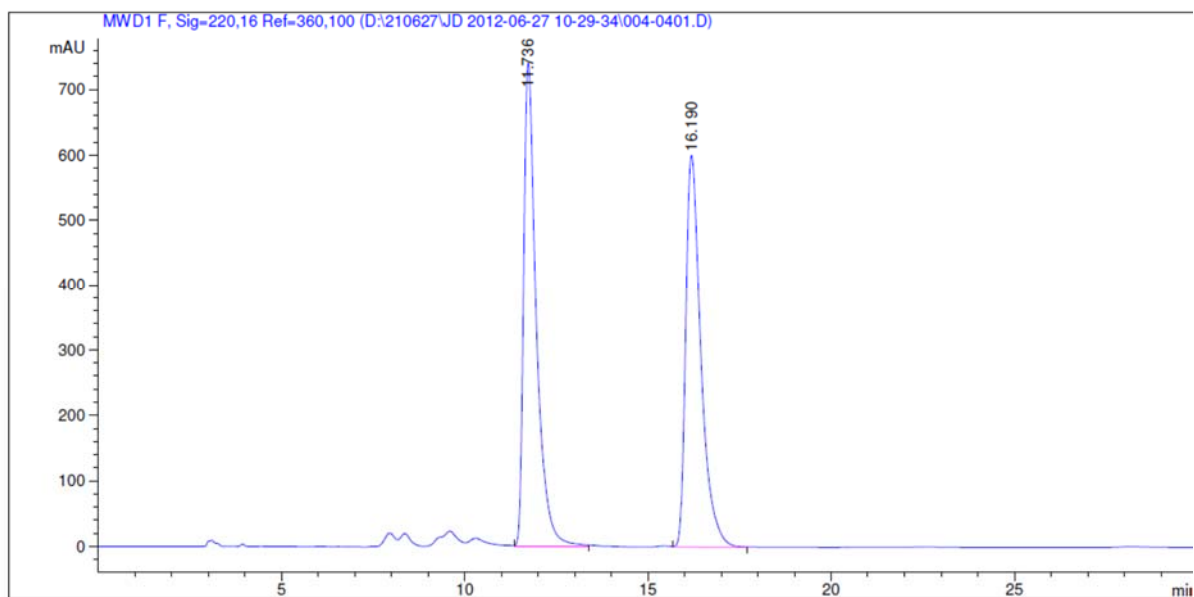

| Peak # | RetTime [min] | Type | Width [min] | Area [mAU*s] | Height [mAU] | Area %  |
|--------|---------------|------|-------------|--------------|--------------|---------|
| 1      | 11.736        | BB   | 0.3625      | 1.78943e4    | 739.02167    | 50.7560 |
| 2      | 16.190        | VB   | 0.4415      | 1.73612e4    | 600.21735    | 49.2440 |

Method Info : Heptan : Ethanol 90.10 Flow 1.0 Det:220nm

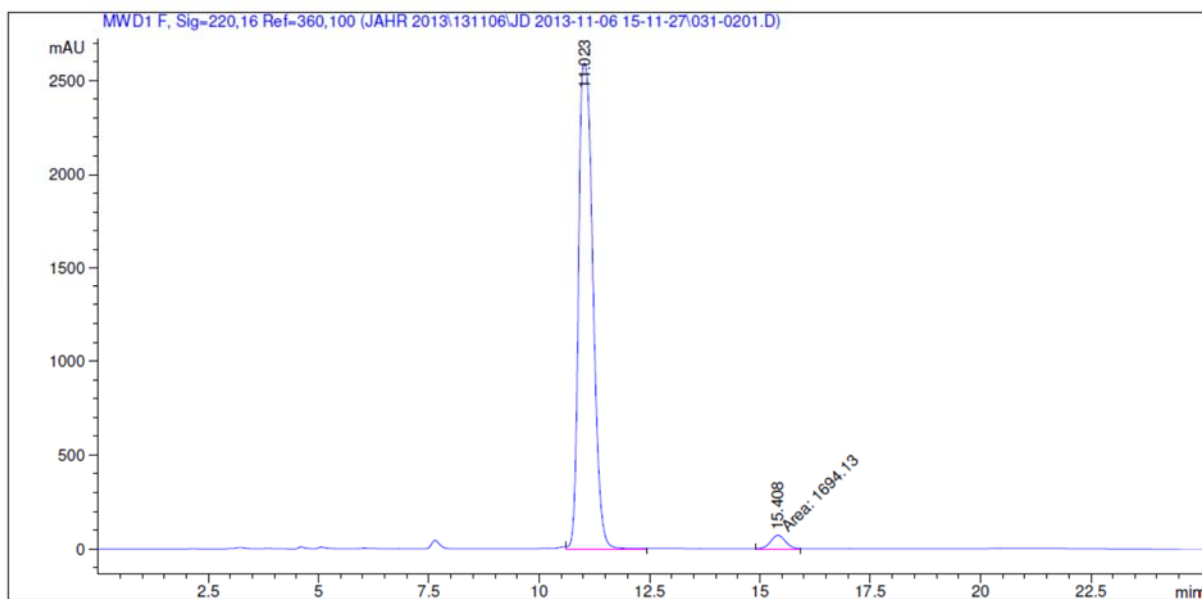

| Peak # | RetTime [min] | Type | Width [min] | Area [mAU*s] | Height [mAU] | Area %  |
|--------|---------------|------|-------------|--------------|--------------|---------|
| 1      | 11.023        | VB   | 0.3542      | 5.82602e4    | 2592.61914   | 97.1743 |
| 2      | 15.408        | MM   | 0.3917      | 1694.13379   | 72.08499     | 2.8257  |

**(R)-5-(4-Fluorophenyl)-2,2,3-trimethylimidazolidin-4-on (2f)**

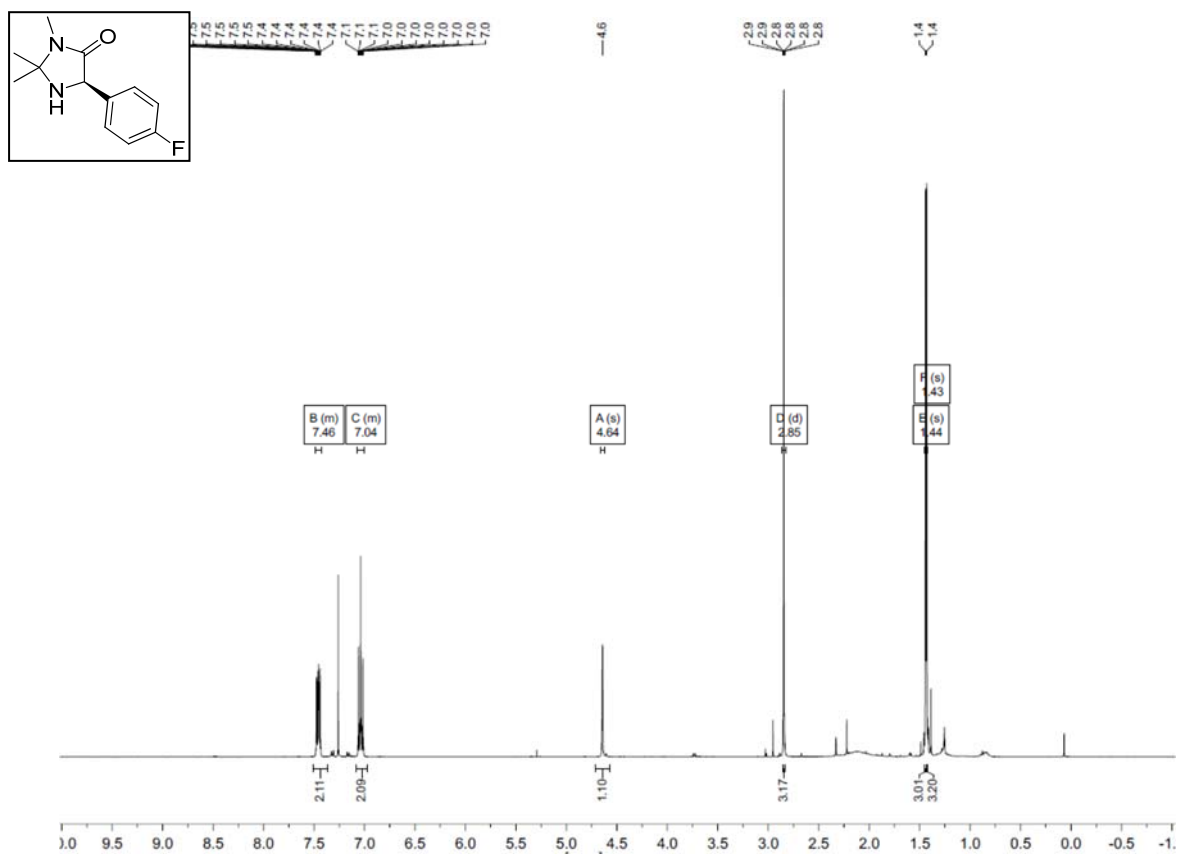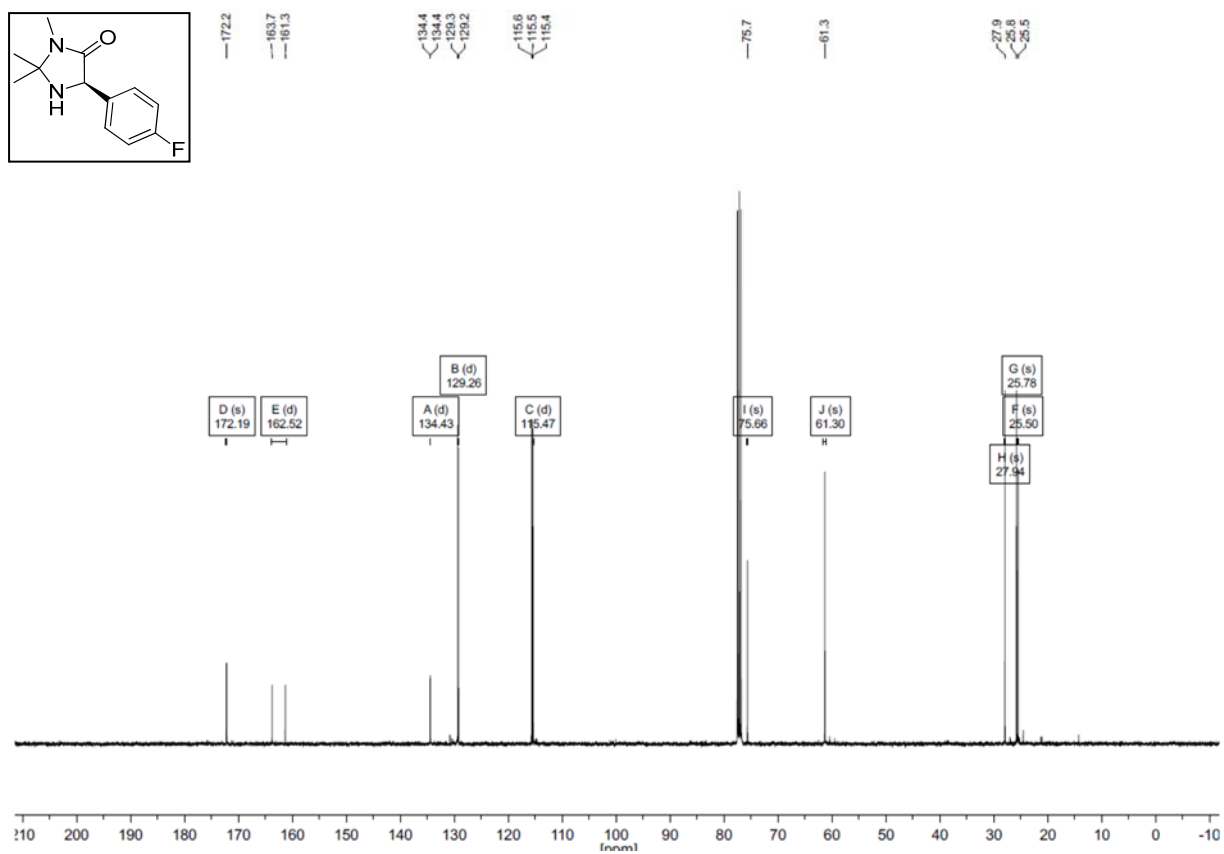

Method Info : Heptan:Ethanol 90:10 Flow: 1 ml/ min Det: 220 nm

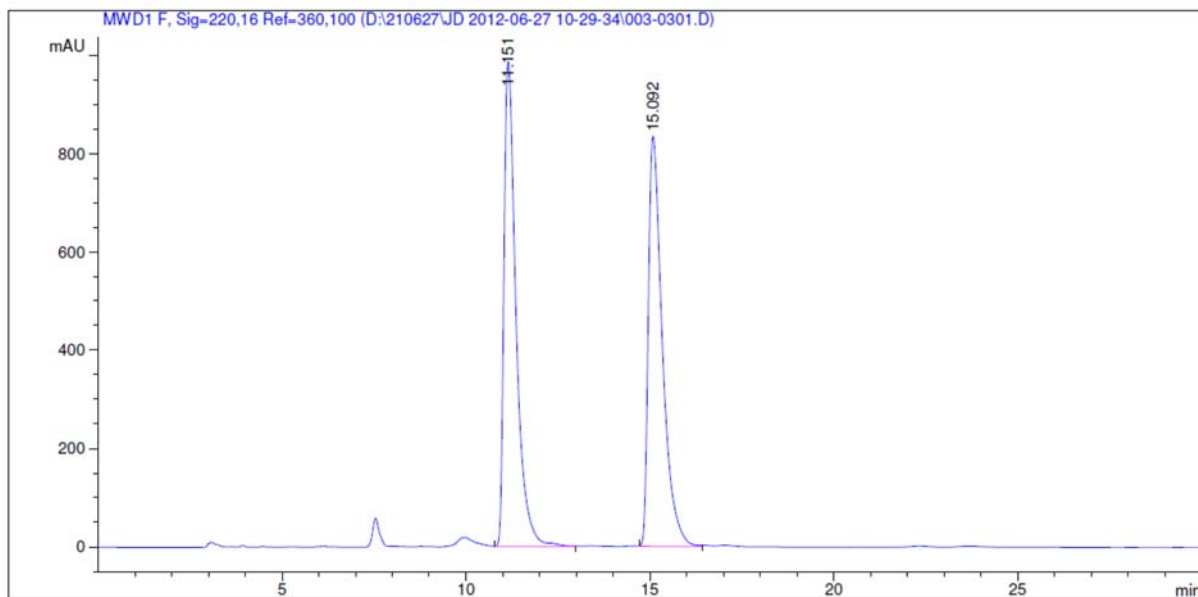

| Peak # | RetTime [min] | Type | Width [min] | Area [mAU*s] | Height [mAU] | Area %  |
|--------|---------------|------|-------------|--------------|--------------|---------|
| 1      | 11.151        | VB   | 0.3485      | 2.26327e4    | 983.48114    | 50.5601 |
| 2      | 15.092        | BB   | 0.3976      | 2.21313e4    | 834.04163    | 49.4399 |

Method Info : Heptan : Ethanol 90.10 Flow 1.0 Det:220nm

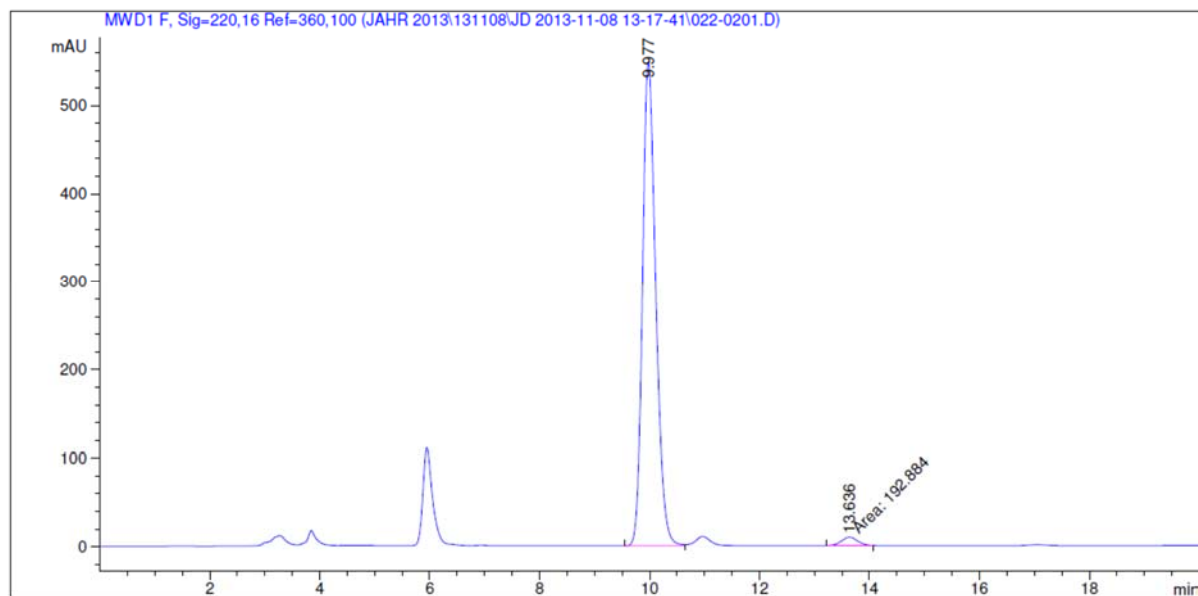

| Peak # | RetTime [min] | Type | Width [min] | Area [mAU*s] | Height [mAU] | Area %  |
|--------|---------------|------|-------------|--------------|--------------|---------|
| 1      | 9.977         | BV   | 0.2575      | 9192.52246   | 548.67303    | 97.9449 |
| 2      | 13.636        | MM   | 0.3402      | 192.88368    | 9.45086      | 2.0551  |

**(R)-5-(4-Methoxyphenyl)-2,2,3-trimethylimidazolidin-4-on (2g)**

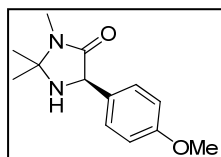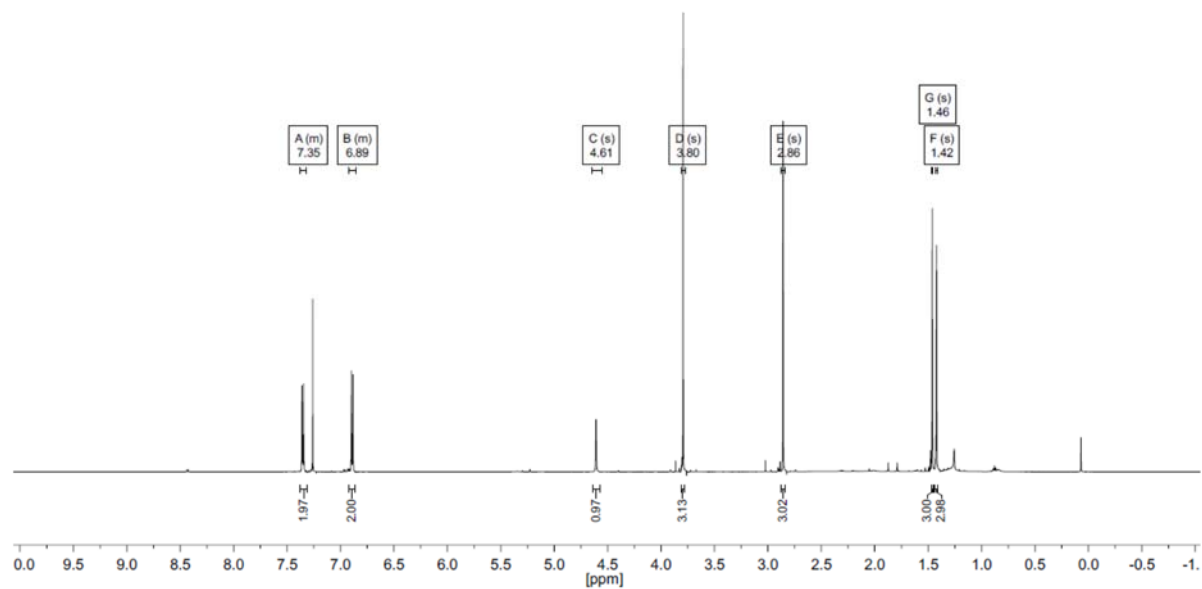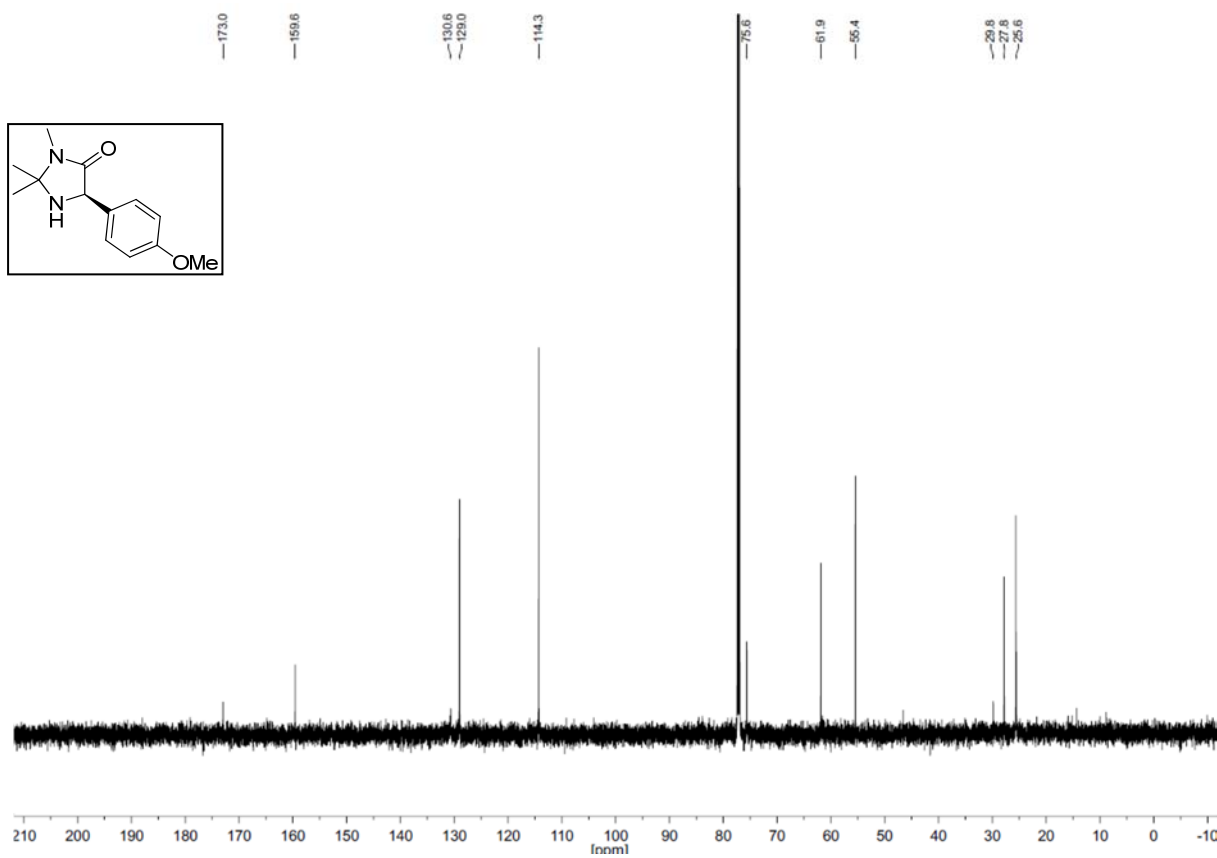

Method Info : Heptan : Ethanol 90 :10 Flow 0.8 ml/min Det:220 nm

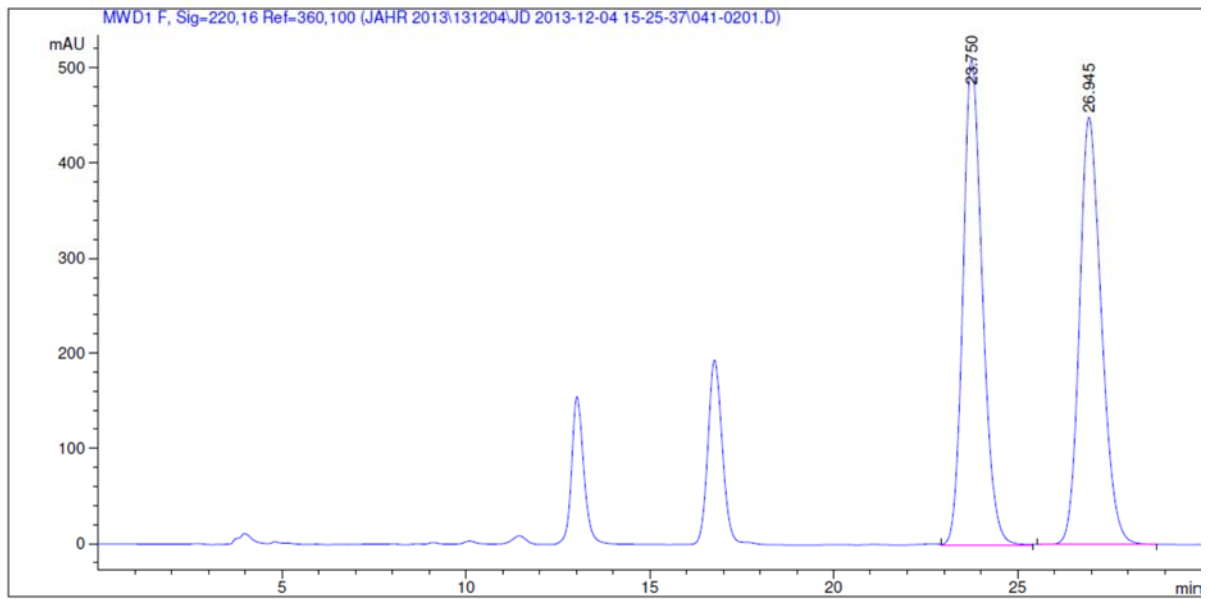

| Peak # | RetTime [min] | Type | Width [min] | Area [mAU*s] | Height [mAU] | Area %  |
|--------|---------------|------|-------------|--------------|--------------|---------|
| 1      | 23.750        | VB   | 0.5601      | 1.86990e4    | 509.56418    | 50.0827 |
| 2      | 26.945        | BB   | 0.6324      | 1.86372e4    | 448.89322    | 49.9173 |

Method Info : Heptan : Ethanol 90:10 Flow 0.8 ml/min Det:220 nm

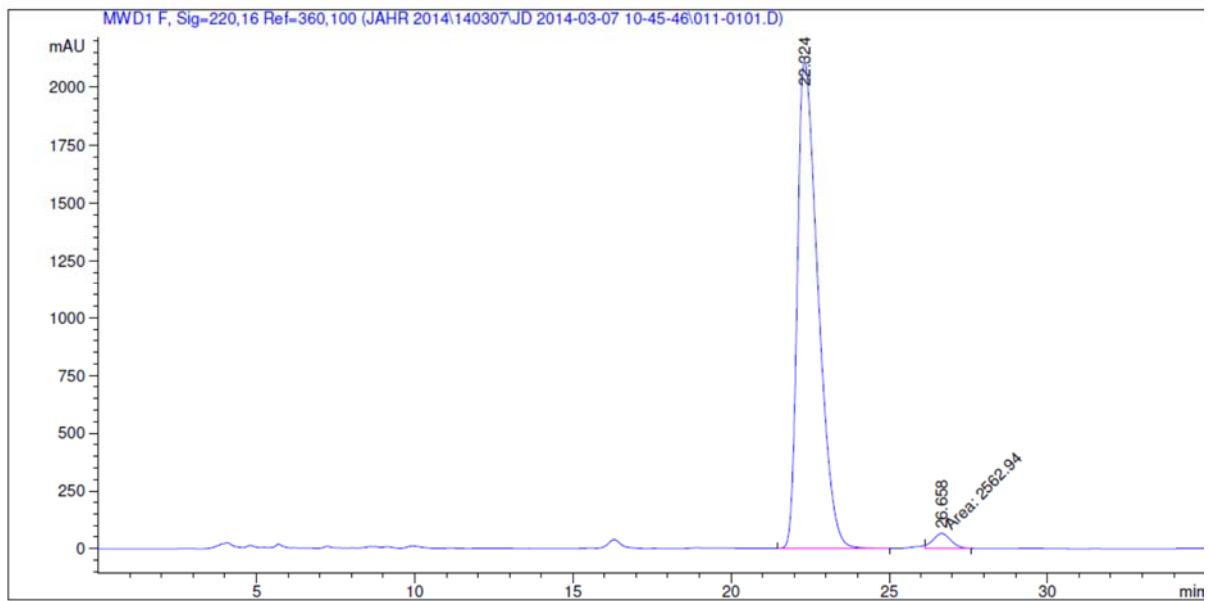

| Peak # | RetTime [min] | Type | Width [min] | Area [mAU*s] | Height [mAU] | Area %  |
|--------|---------------|------|-------------|--------------|--------------|---------|
| 1      | 22.324        | BB   | 0.6883      | 9.55641e4    | 2110.53174   | 97.3881 |
| 2      | 26.658        | MM   | 0.6568      | 2562.94019   | 65.03365     | 2.6119  |



**(R)-4-(1,2,2-Trimethyl-5-oxoimidazolidin-4-yl)benzonitril (2h)**

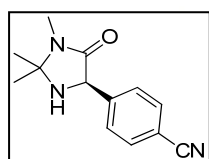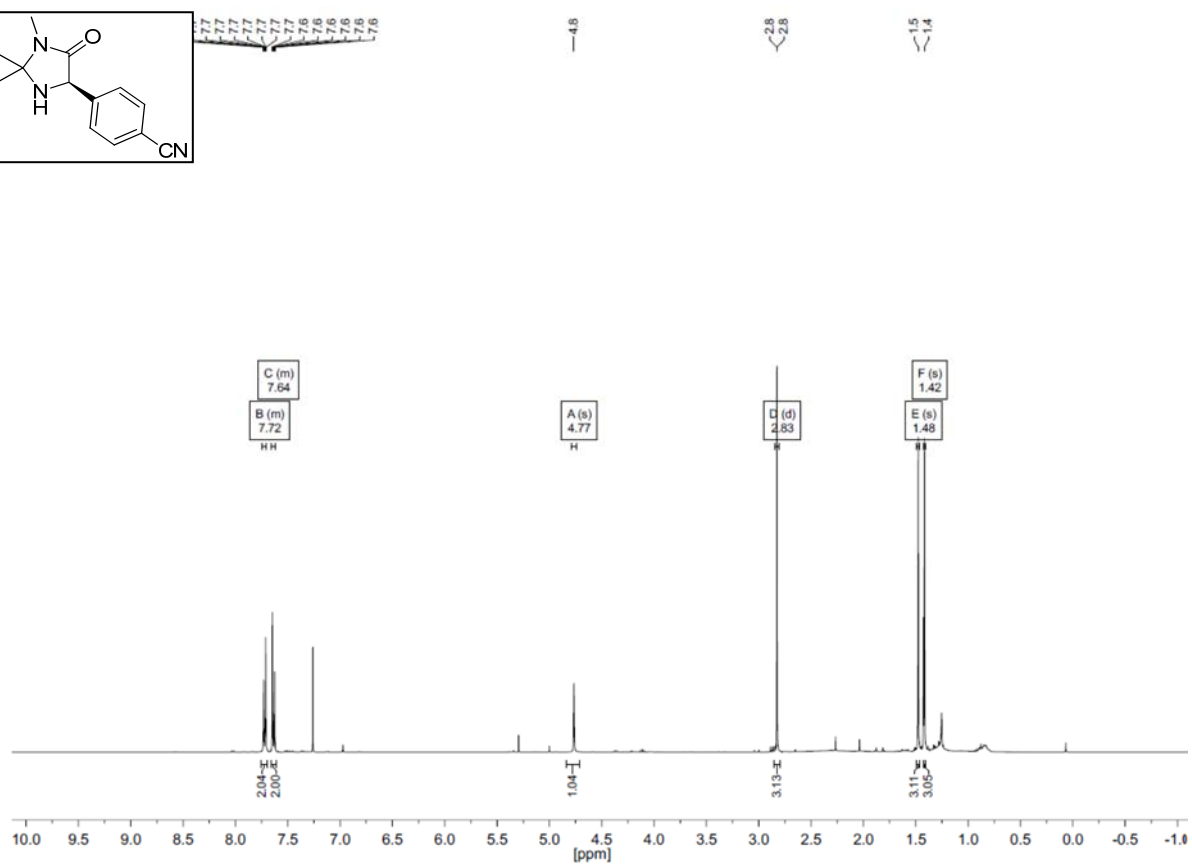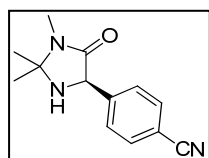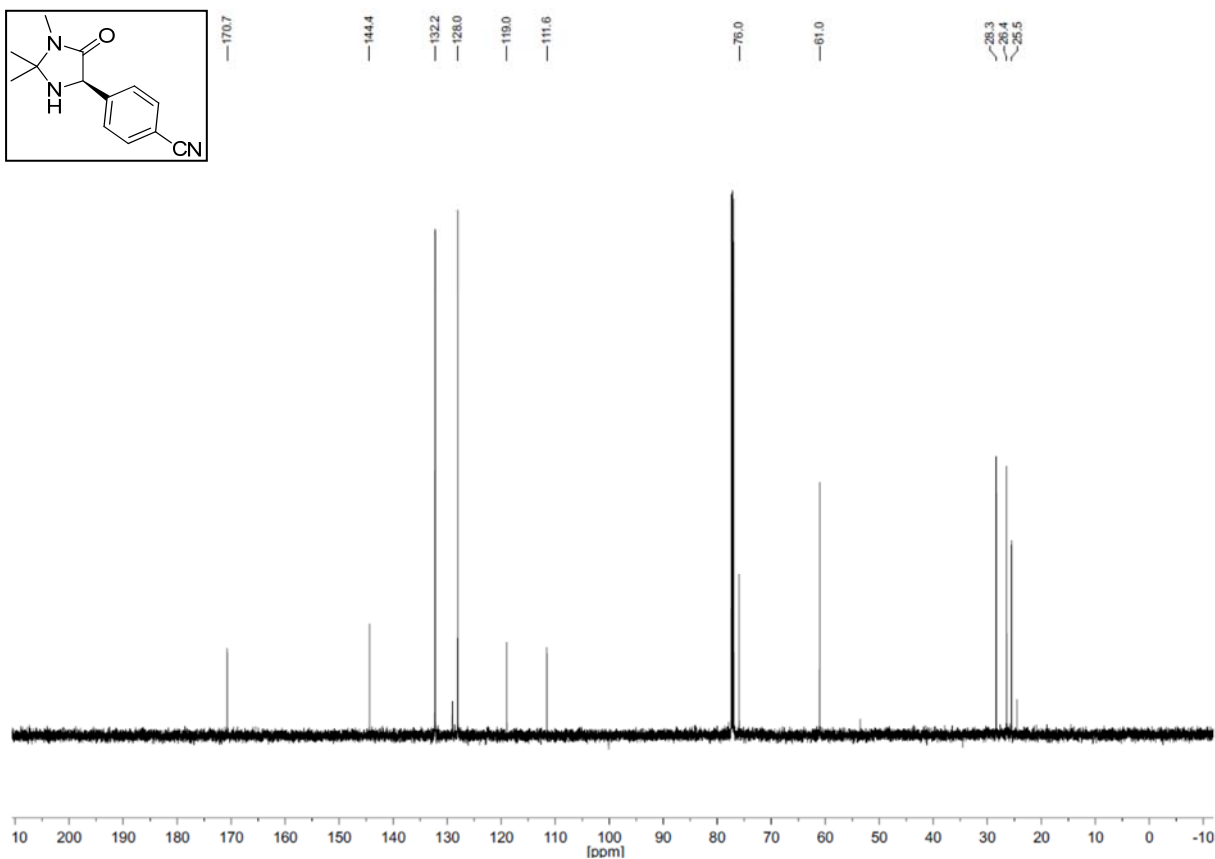

Method Info : Heptan : Ethanol 80 : 20 Flow 0.8 ml/min Det:220 nm

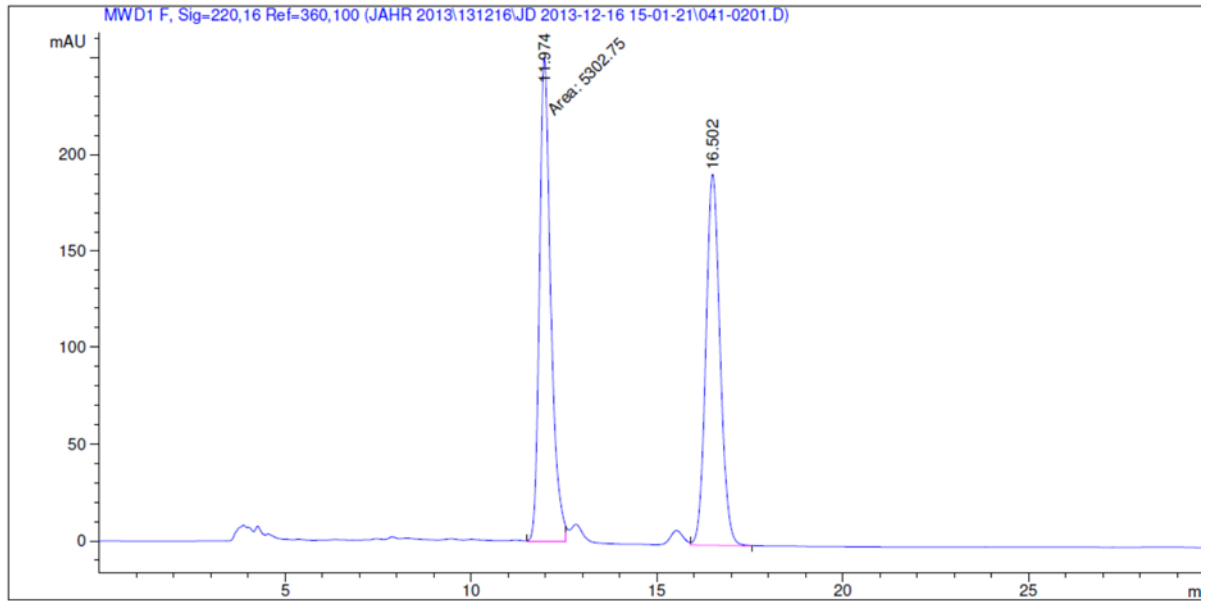

| Peak # | RetTime [min] | Type | Width [min] | Area [mAU*s] | Height [mAU] | Area %  |
|--------|---------------|------|-------------|--------------|--------------|---------|
| 1      | 11.974        | MM   | 0.3527      | 5302.75146   | 250.55412    | 50.9158 |
| 2      | 16.502        | VB   | 0.4083      | 5111.99658   | 192.22241    | 49.0842 |

Method Info : Heptan : Ethanol 80:20 Flow 0.8 ml/min Det:220 nm

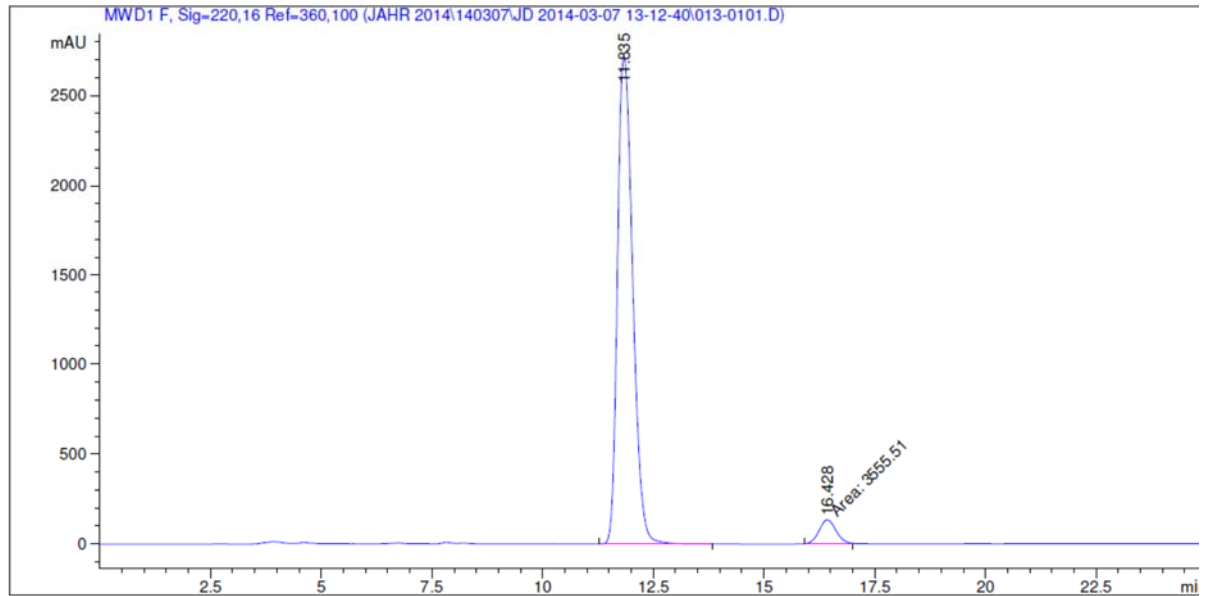

| Peak # | RetTime [min] | Type | Width [min] | Area [mAU*s] | Height [mAU] | Area %  |
|--------|---------------|------|-------------|--------------|--------------|---------|
| 1      | 11.835        | VB   | 0.3734      | 6.49581e4    | 2711.93457   | 94.8105 |
| 2      | 16.428        | MM   | 0.4435      | 3555.50513   | 133.60098    | 5.1895  |

**(R)-5-(4-(Dimethylamino)phenyl)-2,2,3-trimethylimidazolidin-4-on (2i)**

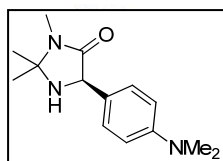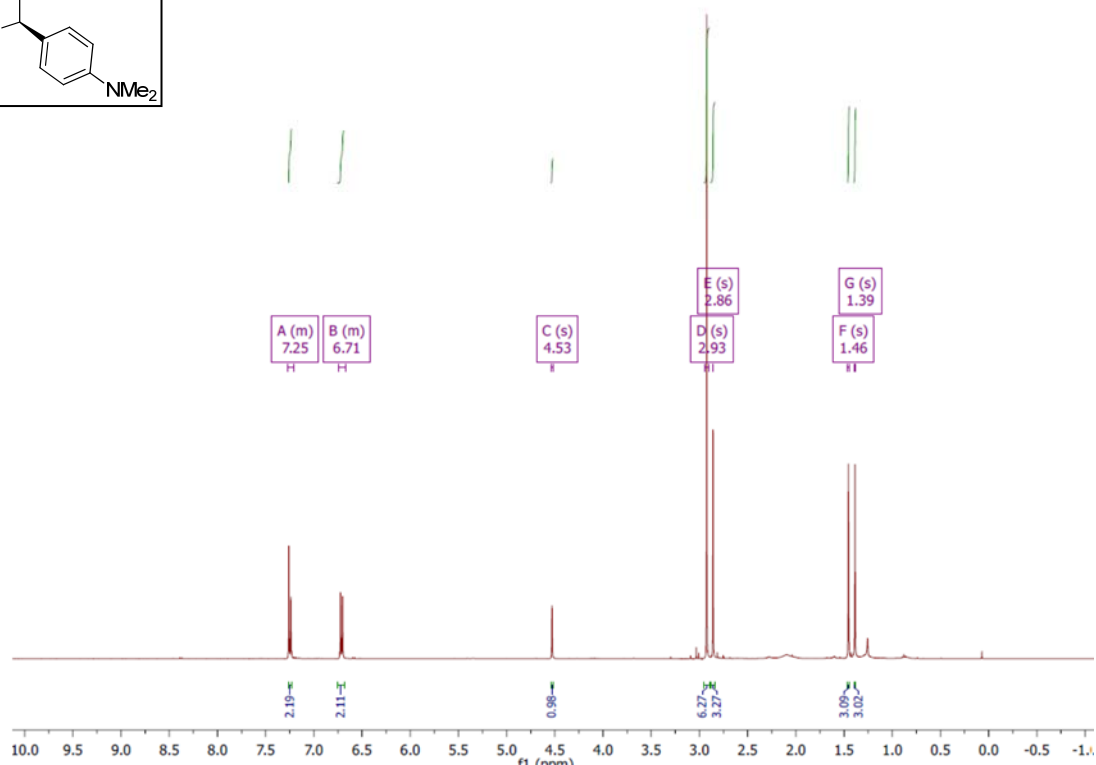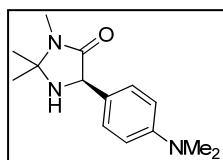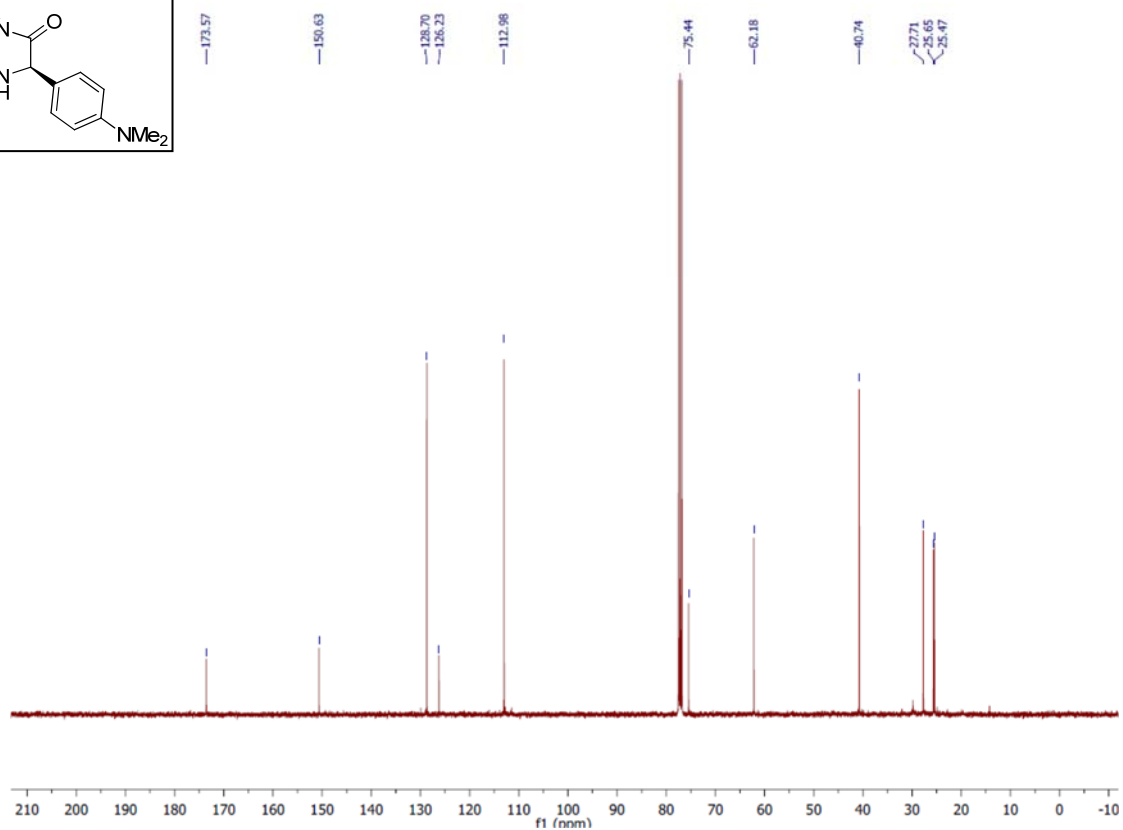

Method Info : Heptan:IPrOH 80 :20 Flow 1.0ml/min Det:220 nm

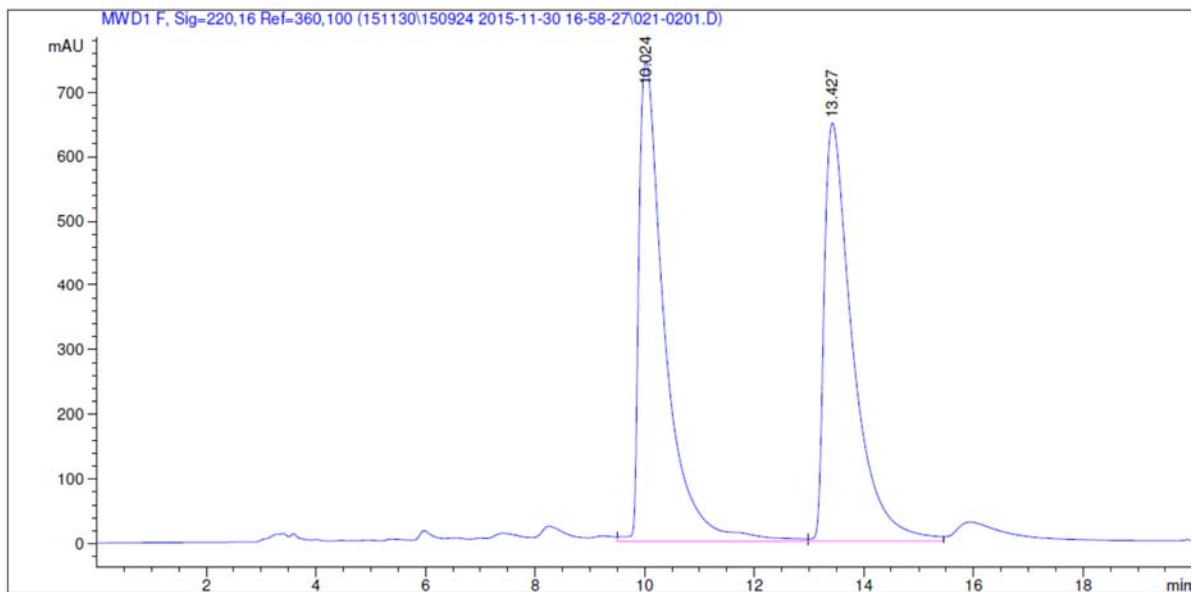

| Peak # | RetTime [min] | Type | Width [min] | Area [mAU*s] | Height [mAU] | Area %  |
|--------|---------------|------|-------------|--------------|--------------|---------|
| 1      | 10.024        | VV   | 0.4774      | 2.42279e4    | 744.94092    | 50.9321 |
| 2      | 13.427        | VV   | 0.5299      | 2.33411e4    | 648.54761    | 49.0679 |

Method Info : Heptan:IPrOH 80 :20 Flow 1.0ml/min Det:220 nm

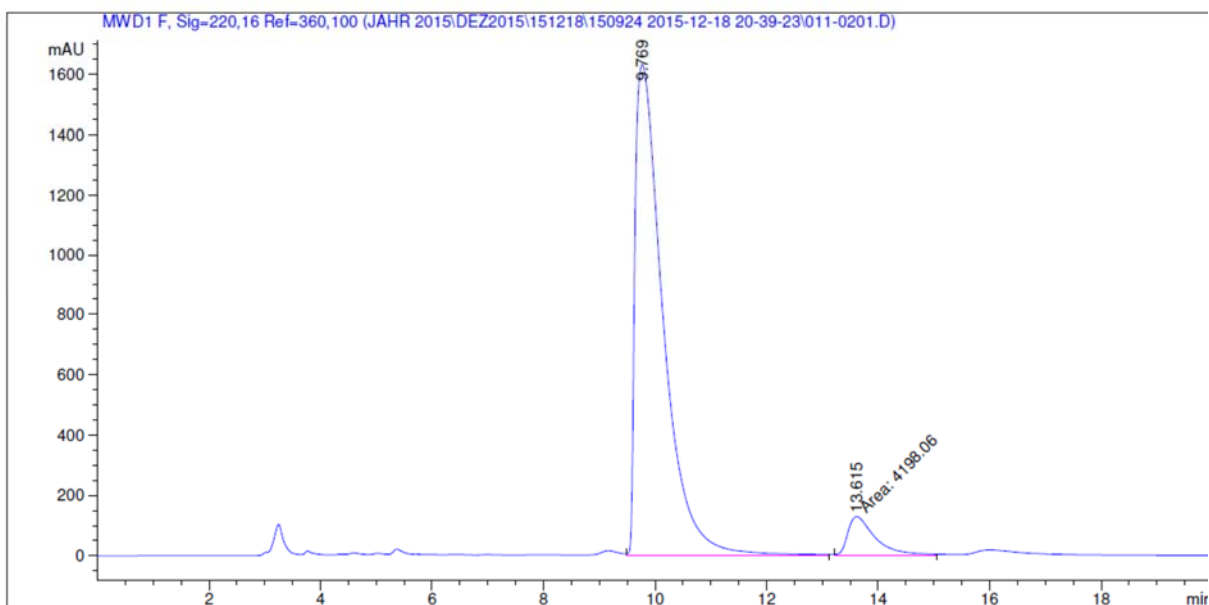

| Peak # | RetTime [min] | Type | Width [min] | Area [mAU*s] | Height [mAU] | Area %  |
|--------|---------------|------|-------------|--------------|--------------|---------|
| 1      | 9.769         | VB   | 0.5283      | 5.67906e4    | 1630.67224   | 93.1167 |
| 2      | 13.615        | MM   | 0.5543      | 4198.06152   | 126.22135    | 6.8833  |

**(R)-5-Hexyl-2,2,3-trimethylimidazolidin-4-on (2j)**

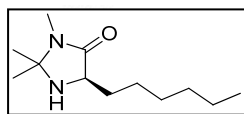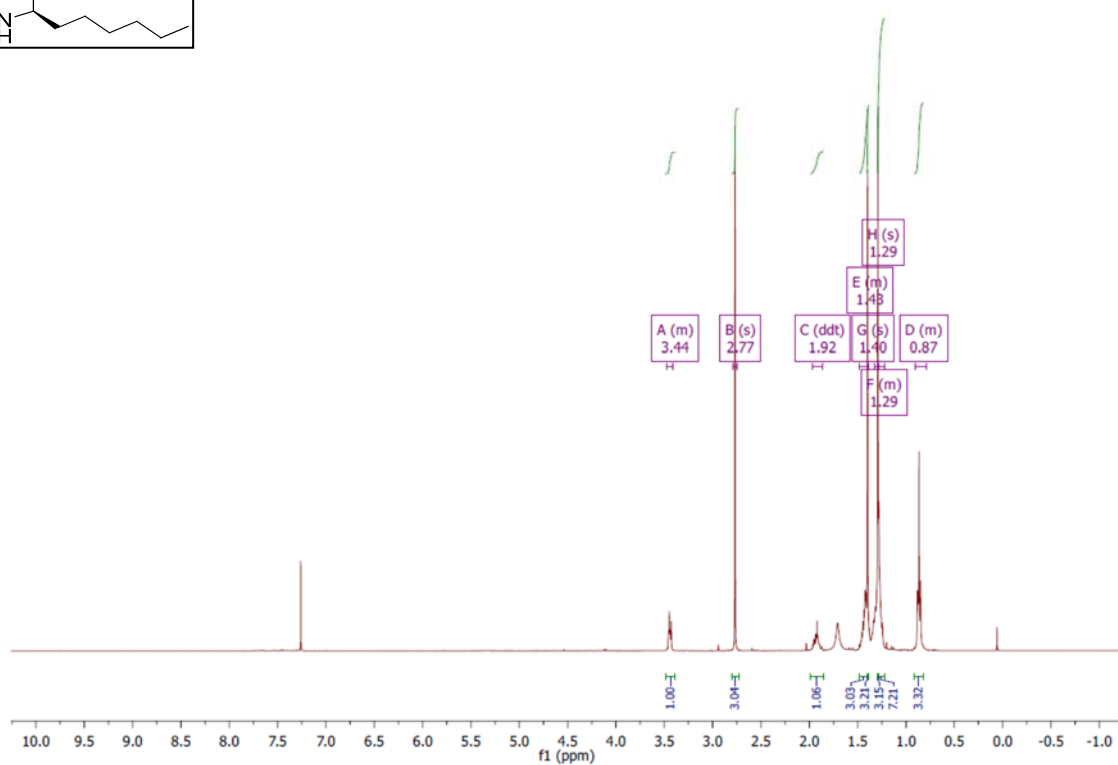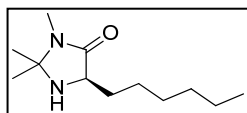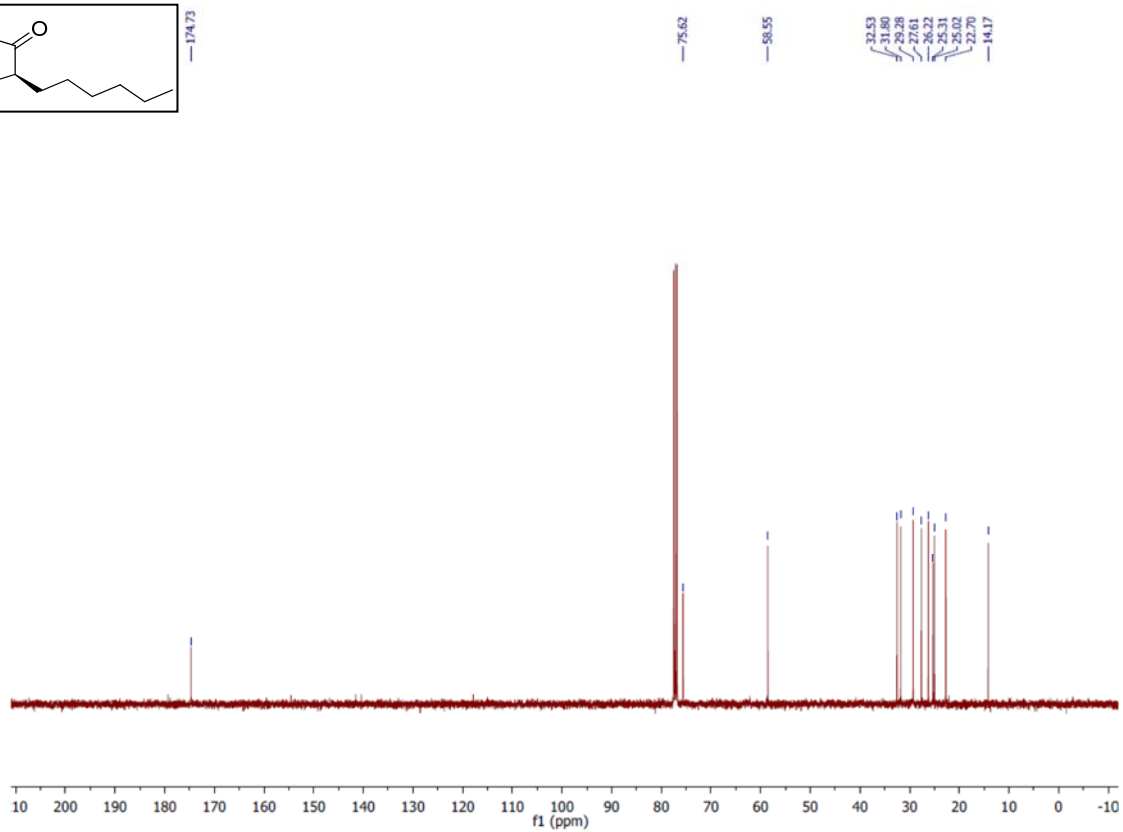

Method Info : Heptan: IPA 95:5 Flow 1.0 ml/min Det:220 nm

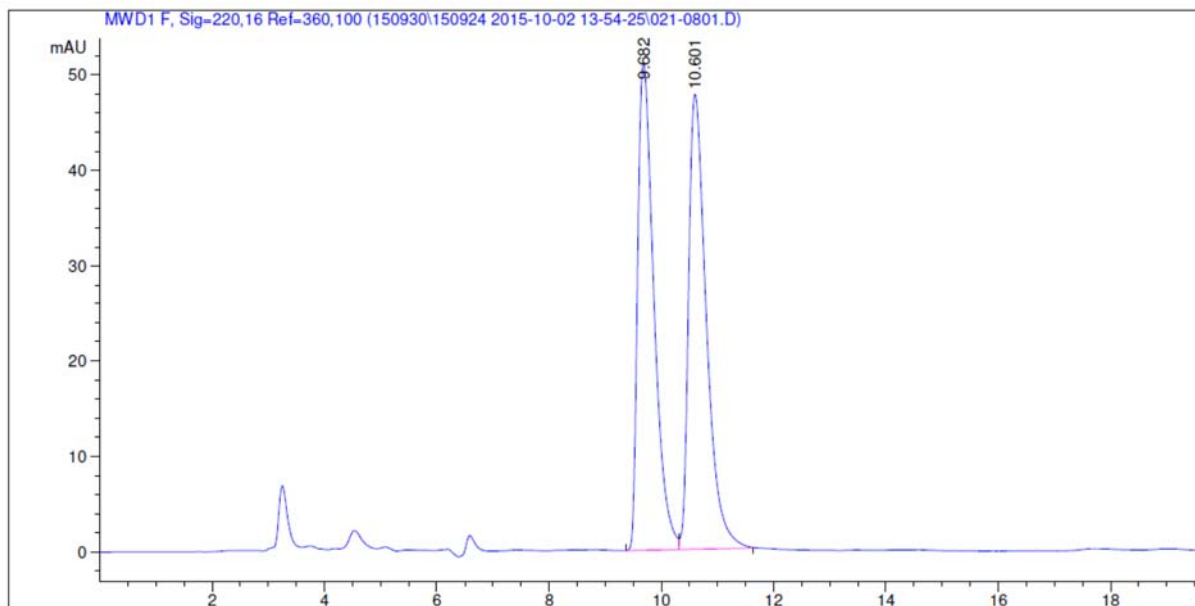

| Peak # | RetTime [min] | Type | Width [min] | Area [mAU*s] | Height [mAU] | Area %  |
|--------|---------------|------|-------------|--------------|--------------|---------|
| 1      | 9.682         | BV   | 0.3101      | 1025.40076   | 51.09300     | 49.4250 |
| 2      | 10.601        | VB   | 0.3366      | 1049.25940   | 47.70996     | 50.5750 |

Method Info : Heptan: IPA 95:5 Flow 1.0 ml/min Det:220 nm

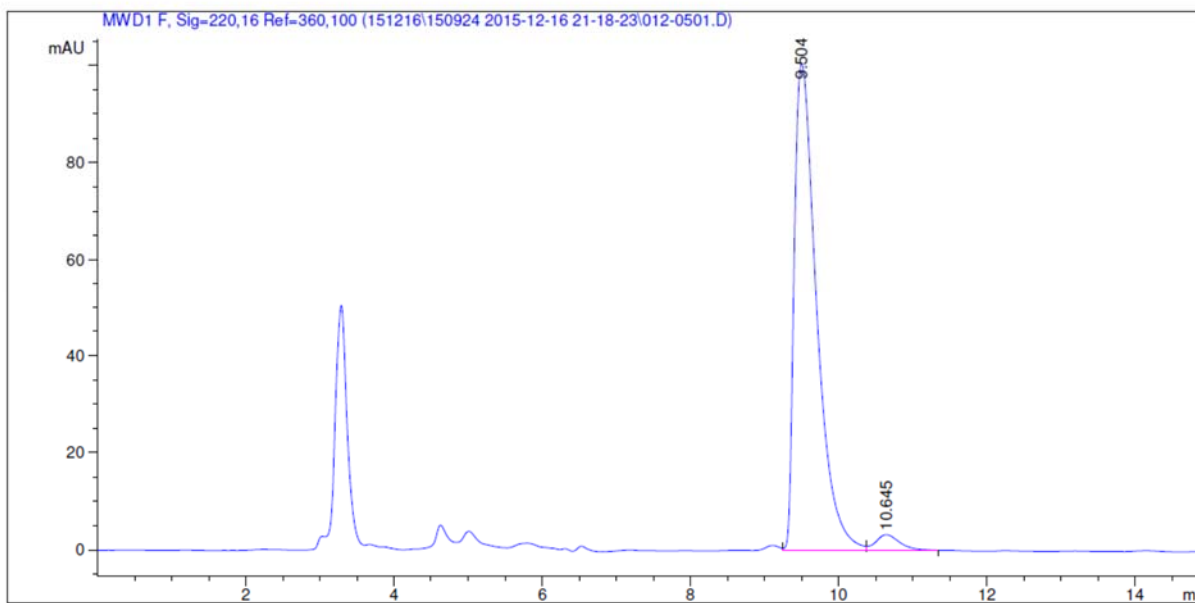

| Peak # | RetTime [min] | Type | Width [min] | Area [mAU*s] | Height [mAU] | Area %  |
|--------|---------------|------|-------------|--------------|--------------|---------|
| 1      | 9.504         | VV   | 0.3174      | 2097.85620   | 100.56700    | 96.5662 |
| 2      | 10.645        | VB   | 0.3322      | 74.59801     | 3.26944      | 3.4338  |

**(R)-5-Isobutyl-2,2,3-trimethylimidazolidin-4-one (2k)**

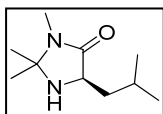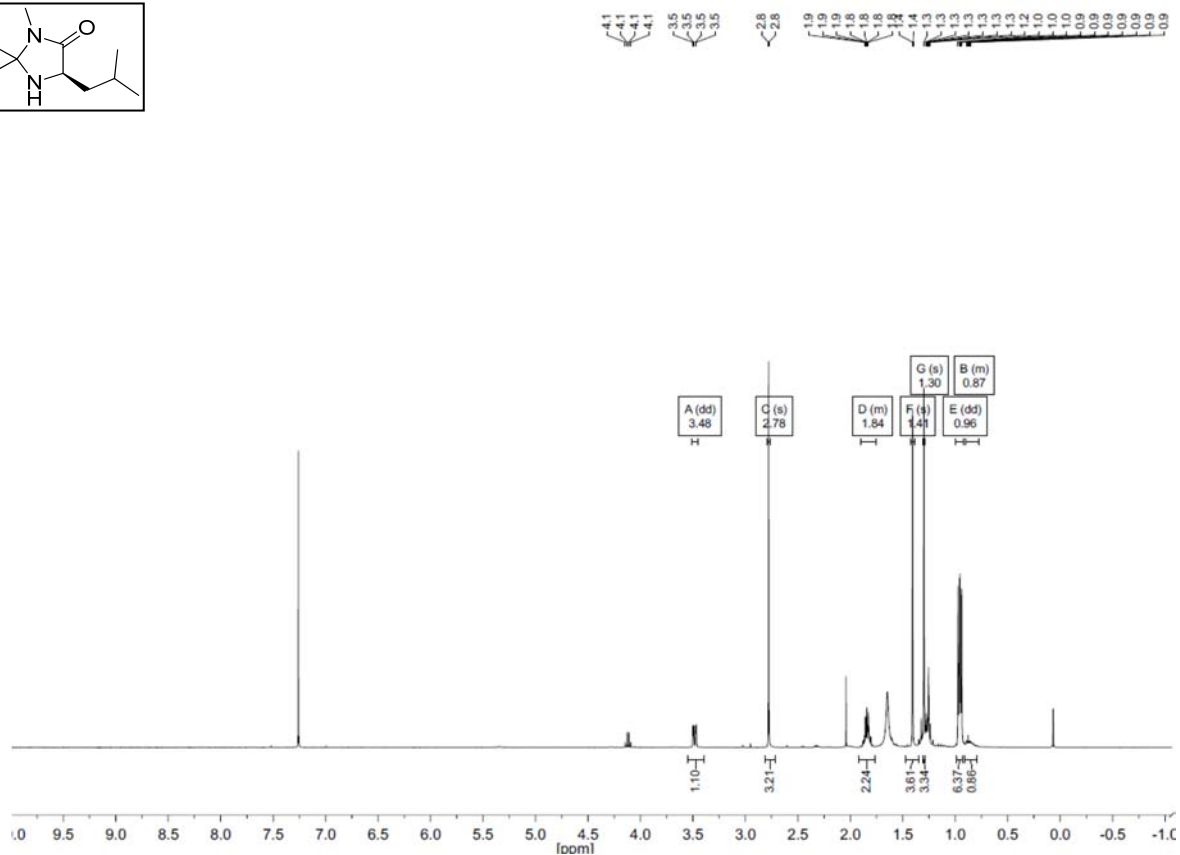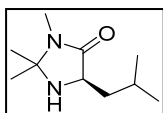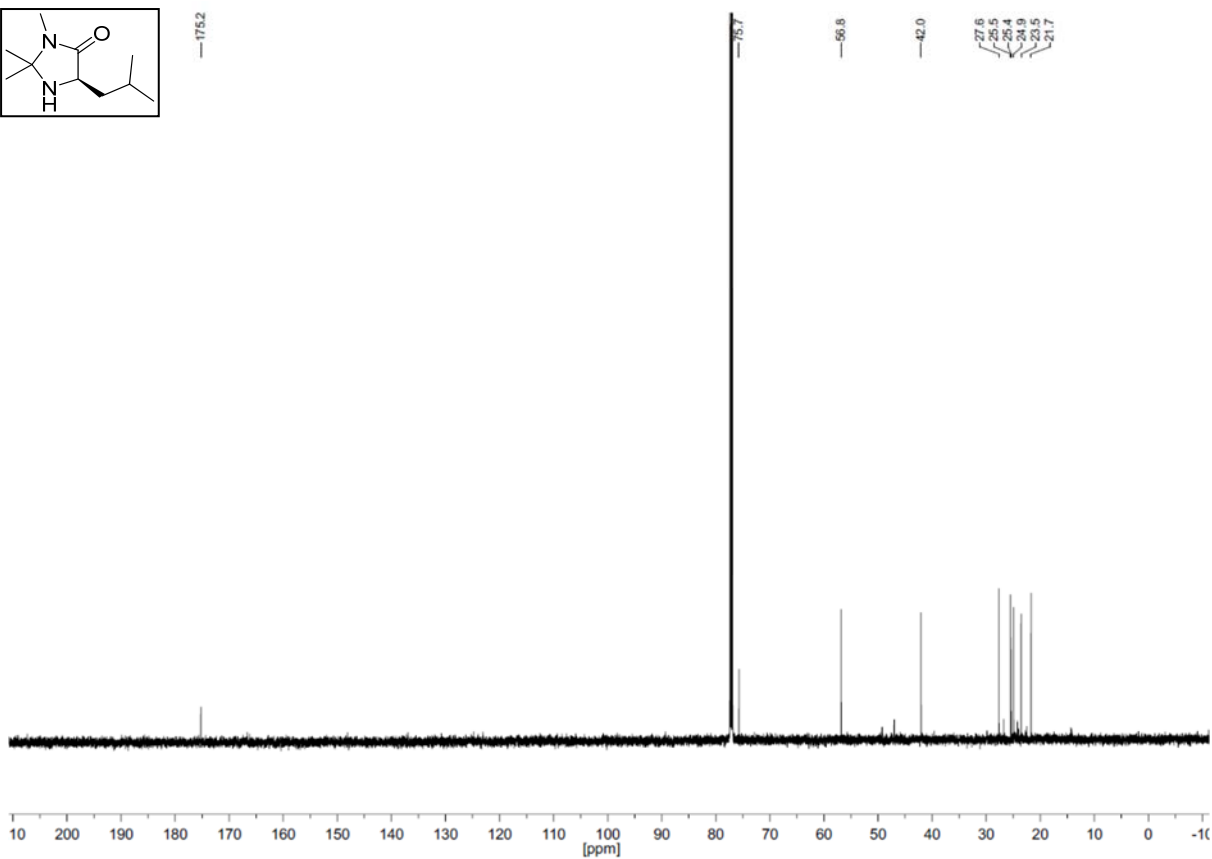

Method Info : Heptan: IPA 95:5 Flow 1.0 ml/min Det:220 nm

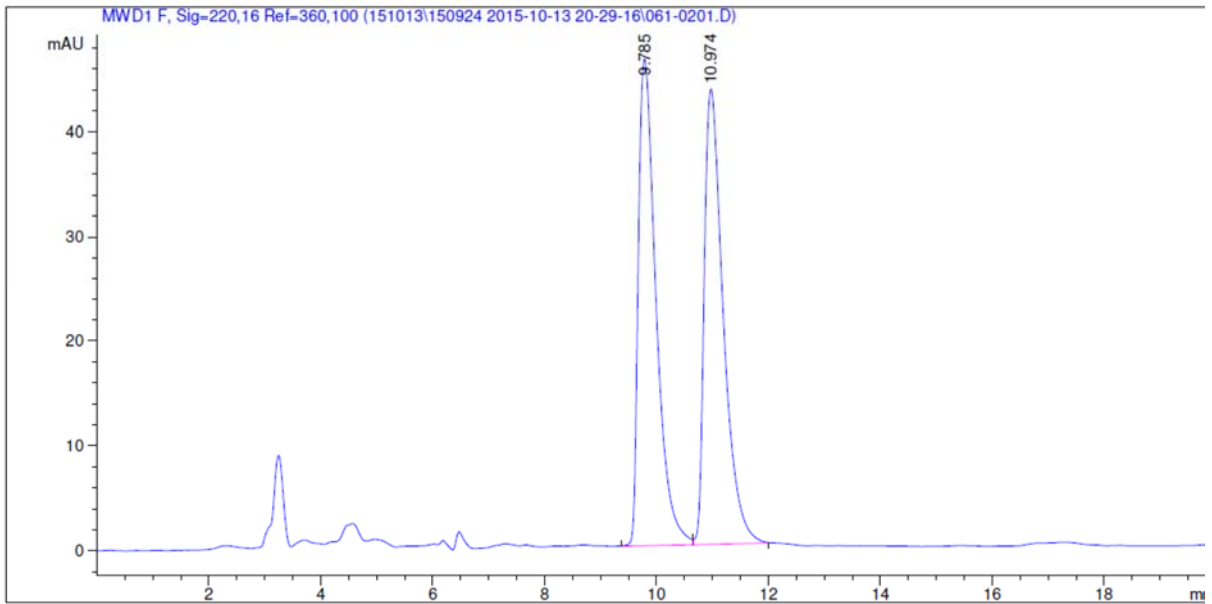

| Peak # | RetTime [min] | Type | Width [min] | Area [mAU*s] | Height [mAU] | Area %  |
|--------|---------------|------|-------------|--------------|--------------|---------|
| 1      | 9.785         | BV   | 0.3359      | 1019.29236   | 46.46140     | 49.8553 |
| 2      | 10.974        | VB   | 0.3613      | 1025.20972   | 43.45367     | 50.1447 |

Method Info : Heptan: IPA 95:5 Flow 1.0 ml/min Det:220 nm

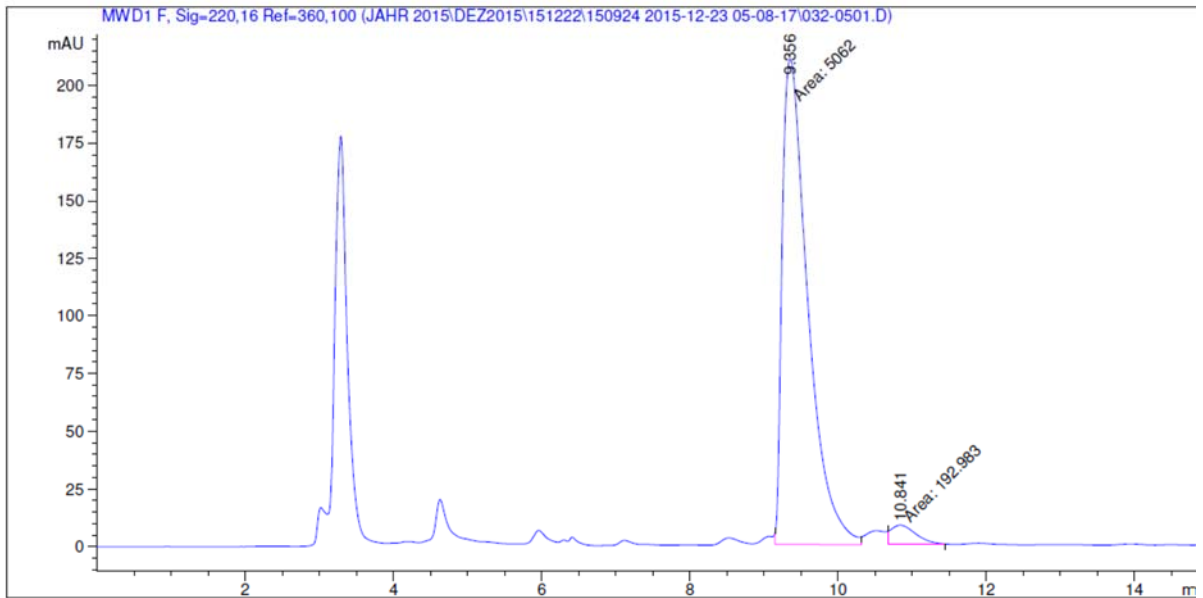

| Peak # | RetTime [min] | Type | Width [min] | Area [mAU*s] | Height [mAU] | Area %  |
|--------|---------------|------|-------------|--------------|--------------|---------|
| 1      | 9.356         | MM   | 0.4009      | 5061.99561   | 210.44225    | 96.3276 |
| 2      | 10.841        | MM   | 0.3907      | 192.98280    | 8.23239      | 3.6724  |



## (R)-5-Benzyl-2,2,3-trimethylimidazolidin-4-on (2l)

Method Info : Heptan: EtOH 95:5 Flow 1.0 ml/min Det:220 nm

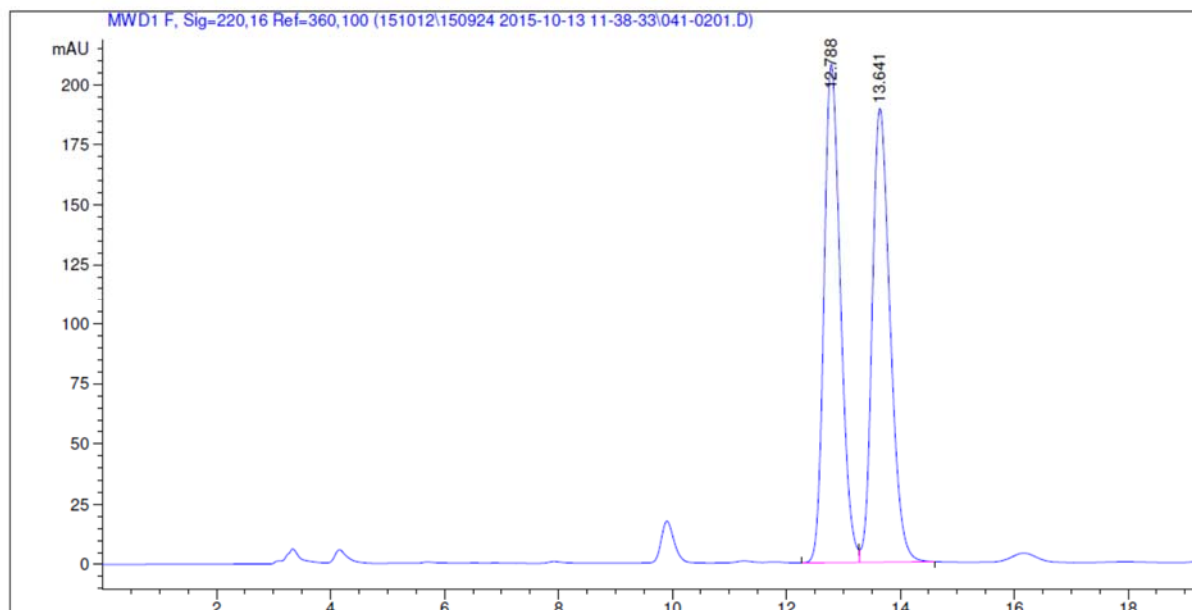

| Peak # | RetTime [min] | Type | Width [min] | Area [mAU*s] | Height [mAU] | Area %  |
|--------|---------------|------|-------------|--------------|--------------|---------|
| 1      | 12.788        | BV   | 0.3103      | 4171.21338   | 207.72289    | 50.2534 |
| 2      | 13.641        | VB   | 0.3387      | 4129.14551   | 189.17377    | 49.7466 |

Method Info : Heptan: EtOH 95:5 Flow 1.0 ml/min Det:220 nm

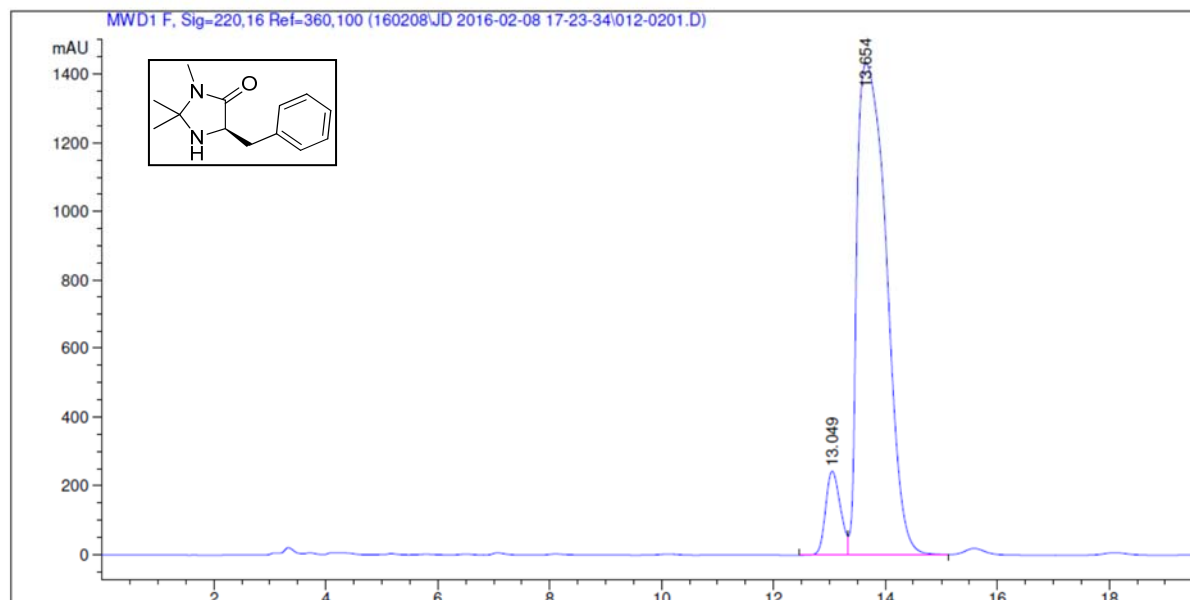

| Peak # | RetTime [min] | Type | Width [min] | Area [mAU*s] | Height [mAU] | Area %  |
|--------|---------------|------|-------------|--------------|--------------|---------|
| 1      | 13.049        | BV   | 0.2893      | 4497.08301   | 243.64632    | 7.9874  |
| 2      | 13.654        | VV   | 0.5977      | 5.18050e4    | 1433.31750   | 92.0126 |

**(R)-5-Isopropyl-2,2,3-trimethylimidazolidin-4-one (2m)**

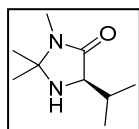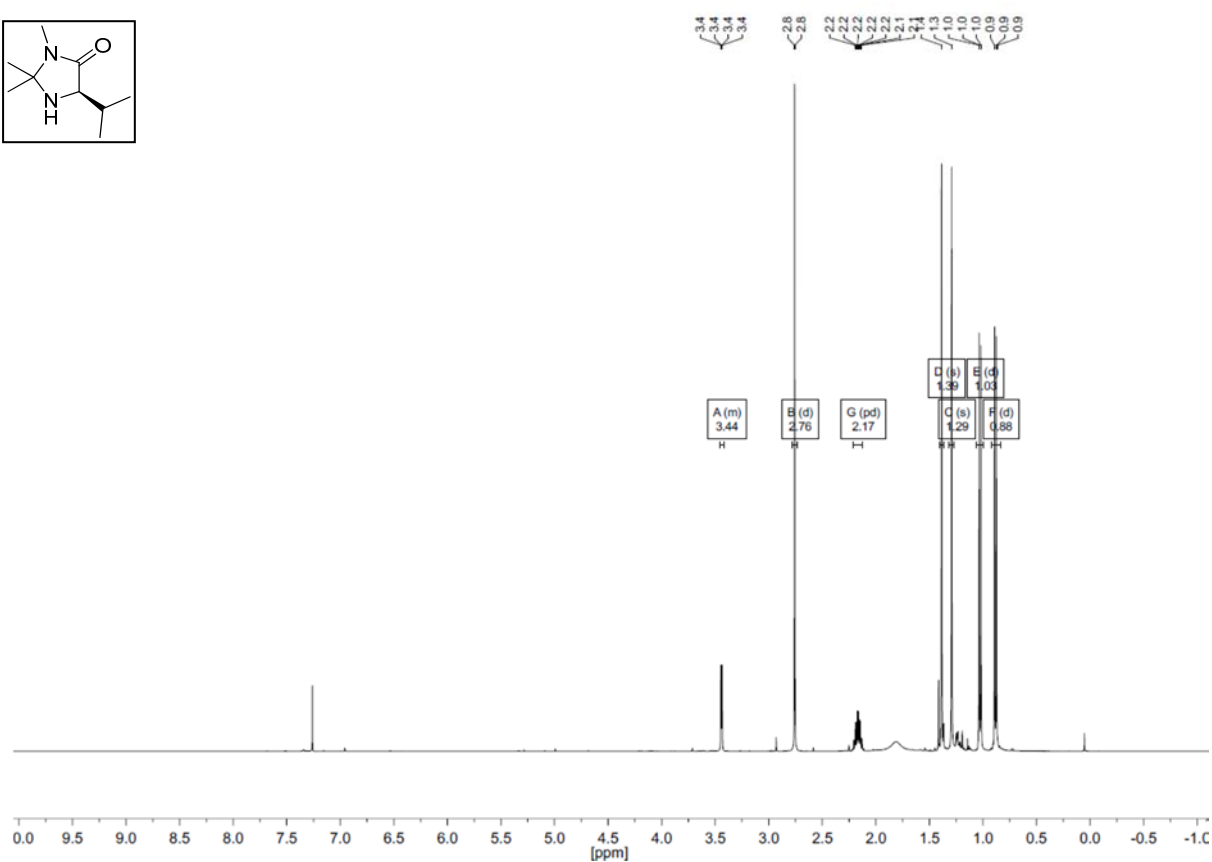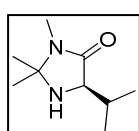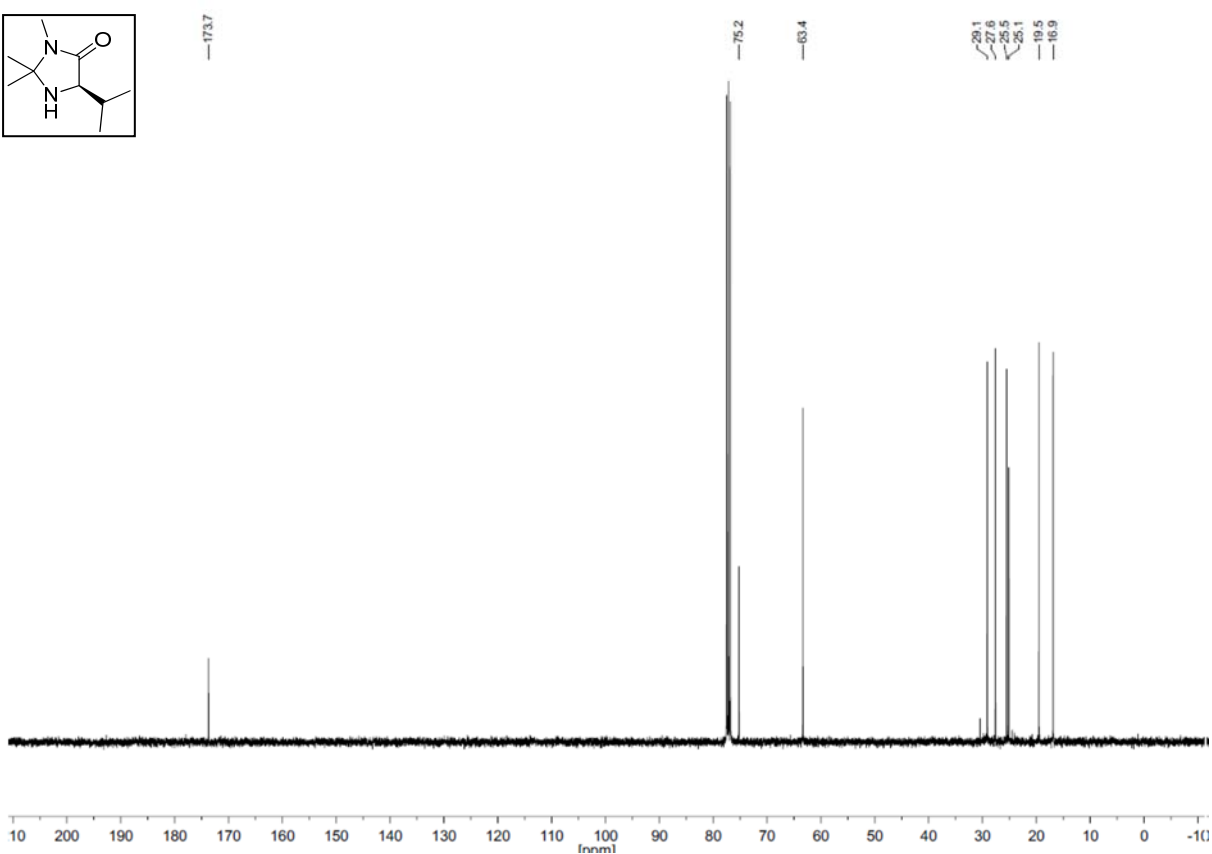

Method Info : Heptan: EtOH 95:5 Flow 1.0 ml/min Det:220 nm

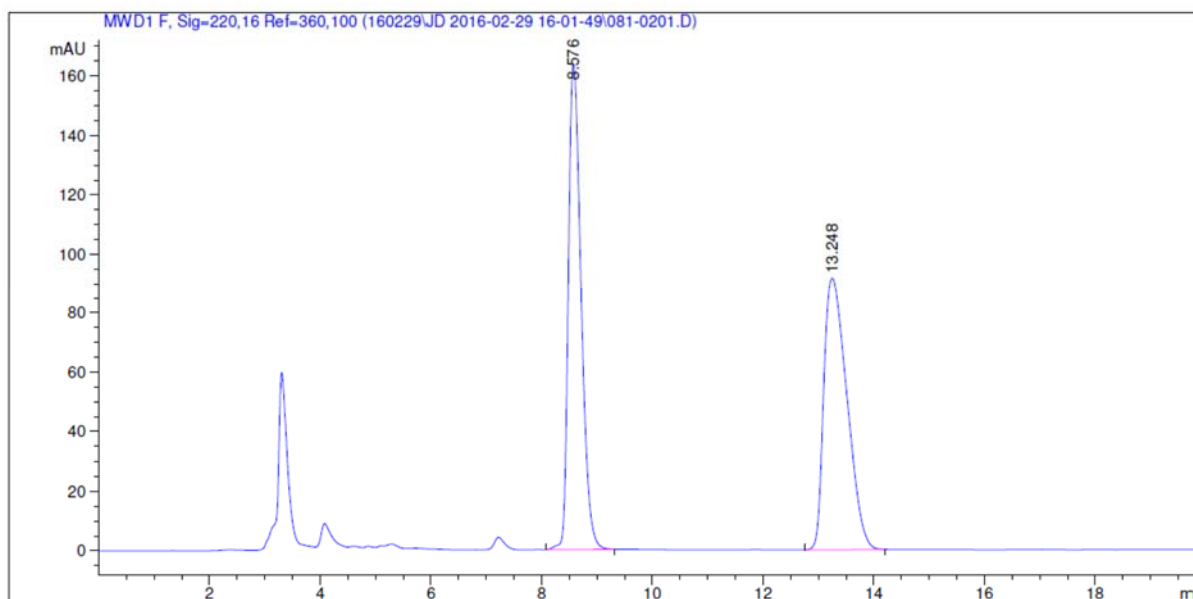

| Peak # | RetTime [min] | Type | Width [min] | Area [mAU*s] | Height [mAU] | Area %  |
|--------|---------------|------|-------------|--------------|--------------|---------|
| 1      | 8.576         | BB   | 0.2479      | 2607.18408   | 163.61948    | 49.6081 |
| 2      | 13.248        | BB   | 0.4612      | 2648.37378   | 91.63389     | 50.3919 |

Method Info : Heptan: EtOH 95:5 Flow 1.0 ml/min Det:220 nm

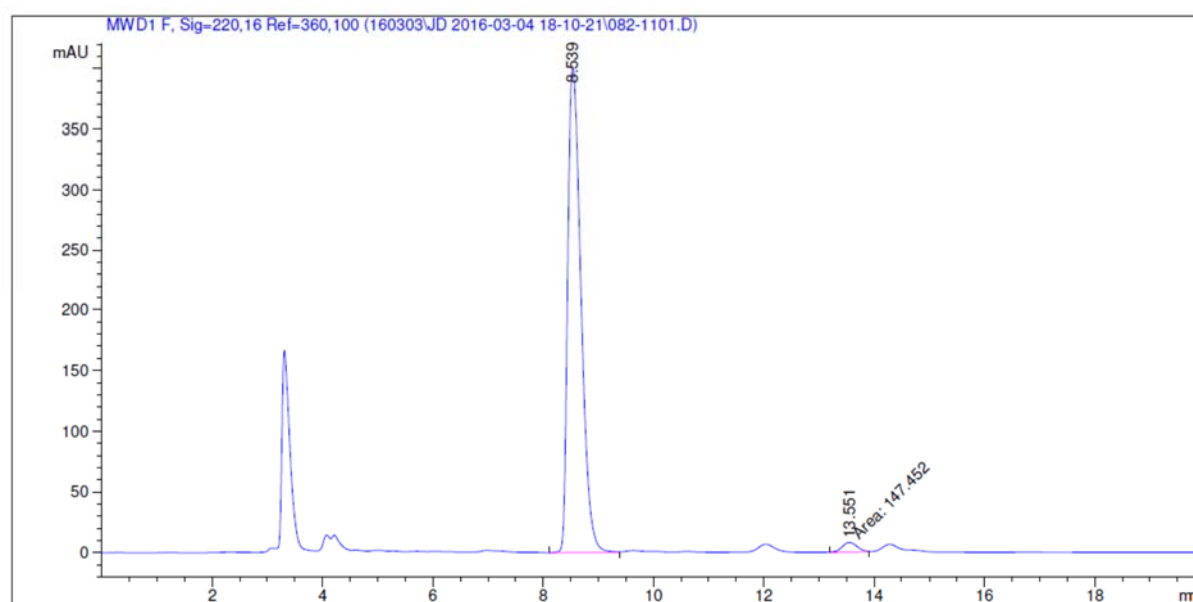

| Peak # | RetTime [min] | Type | Width [min] | Area [mAU*s] | Height [mAU] | Area %  |
|--------|---------------|------|-------------|--------------|--------------|---------|
| 1      | 8.539         | BB   | 0.2619      | 6666.01709   | 401.01962    | 97.8359 |
| 2      | 13.551        | MM   | 0.3156      | 147.45221    | 7.78751      | 2.1641  |

**(R)-5-Cyclohexyl-2,2,3-trimethylimidazolidin-4-one (2n)**

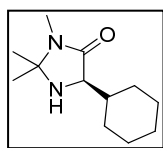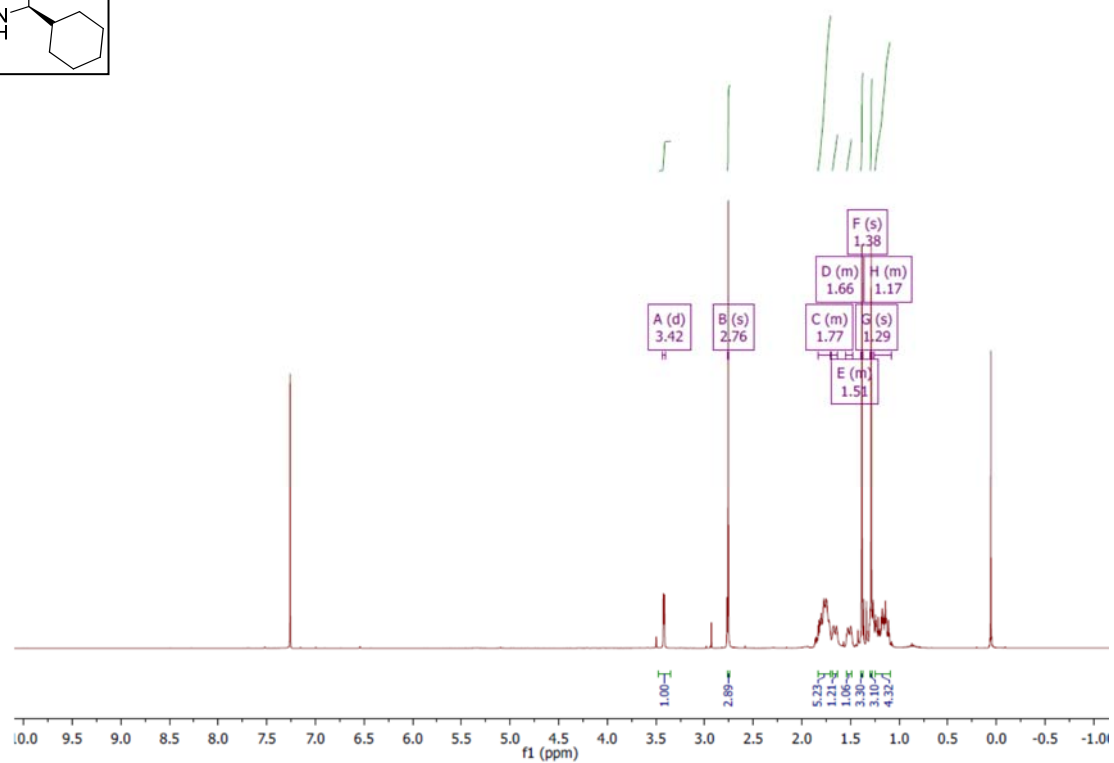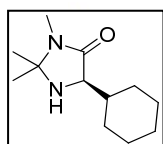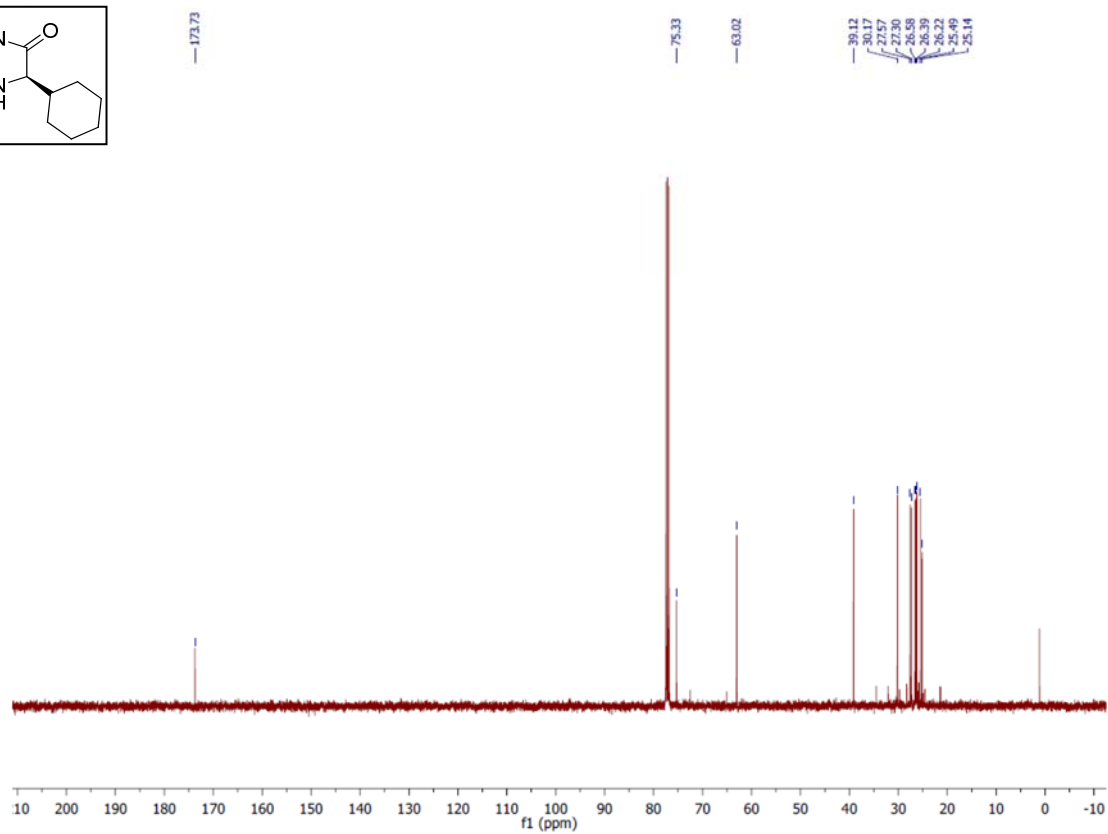

Method Info : Heptan: EtOH 95:5 Flow 1.0 ml/min Det:220 nm

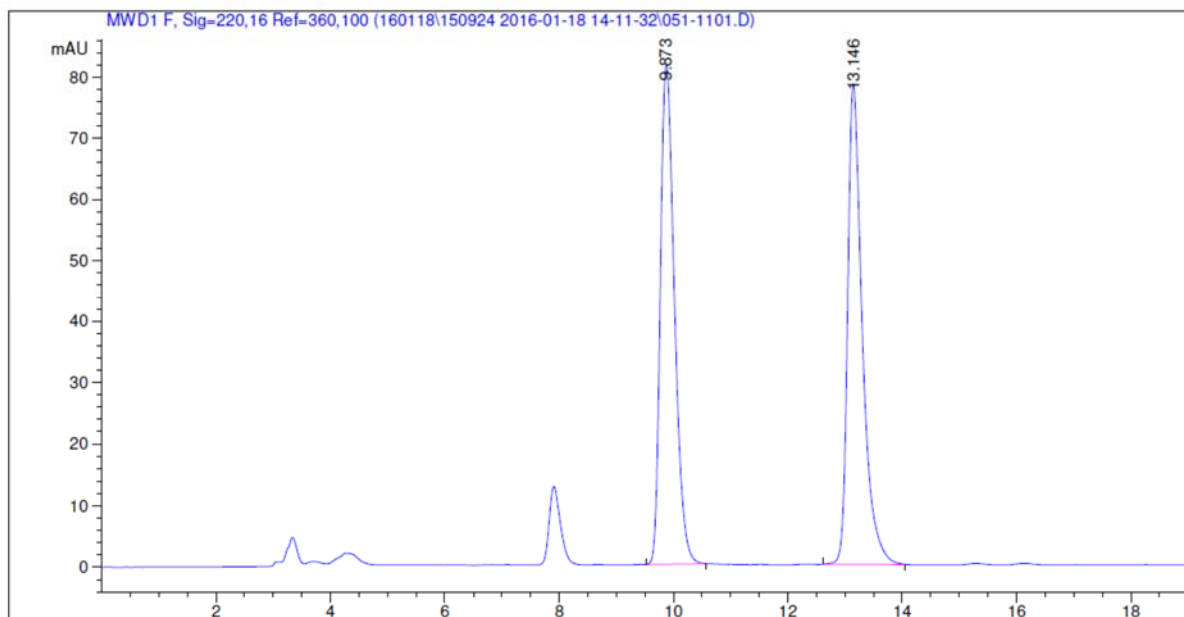

| Peak # | RetTime [min] | Type | Width [min] | Area [mAU*s] | Height [mAU] | Area %  |
|--------|---------------|------|-------------|--------------|--------------|---------|
| 1      | 9.873         | BB   | 0.2644      | 1387.90833   | 81.61398     | 49.9104 |
| 2      | 13.146        | BB   | 0.2651      | 1392.88904   | 78.45223     | 50.0896 |

Method Info : Heptan: EtOH 95:5 Flow 1.0 ml/min Det:220 nm

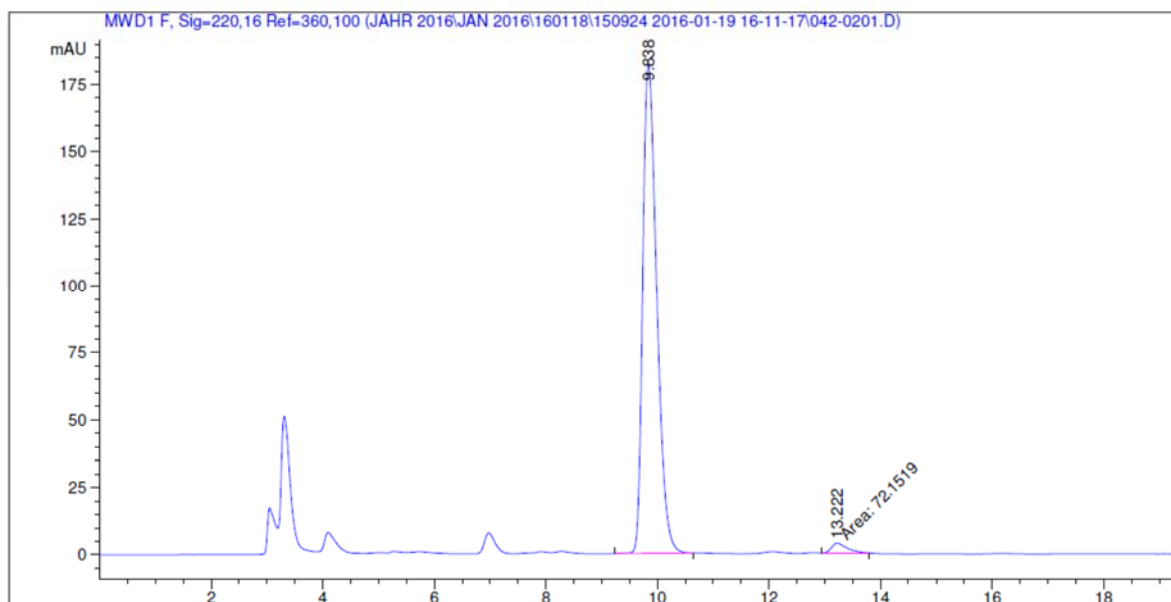

| Peak # | RetTime [min] | Type | Width [min] | Area [mAU*s] | Height [mAU] | Area %  |
|--------|---------------|------|-------------|--------------|--------------|---------|
| 1      | 9.838         | BB   | 0.2734      | 3173.86938   | 182.06596    | 97.7772 |
| 2      | 13.222        | MM   | 0.3241      | 72.15190     | 3.71061      | 2.2228  |

## D-Phenylglycine methyl amide (5)

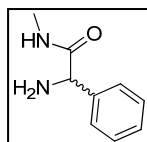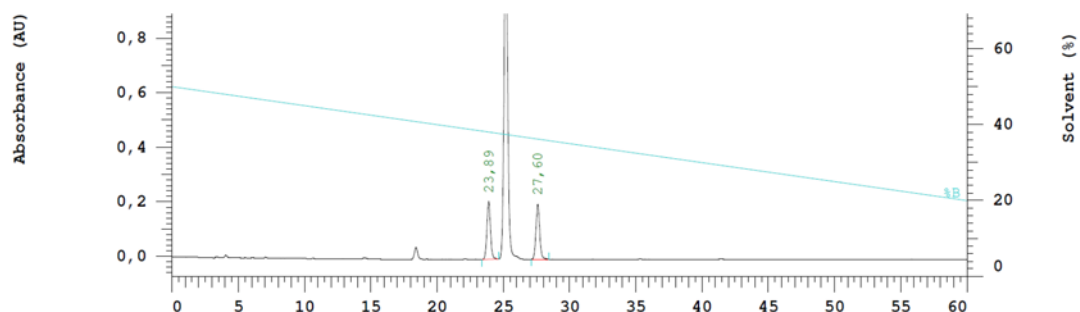

| Time (min) | %ACN | %0.1% | %Wasse | %Metha | Flow (ml/min) |
|------------|------|-------|--------|--------|---------------|
| 0,0        | 50,0 | 50,0  | 0,0    | 0,0    | 0,600         |
| 60,0       | 80,0 | 20,0  | 0,0    | 0,0    | 0,600         |

| No. | RT    | Area    | Conc 1 |
|-----|-------|---------|--------|
| 1   | 23,89 | 1986919 | 50,079 |
| 2   | 27,60 | 1980653 | 49,921 |

The unpicked peak at the retention time of 25.5 minutes belongs to the derivatisation reagent.<sup>6</sup>

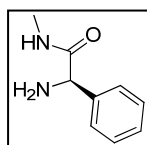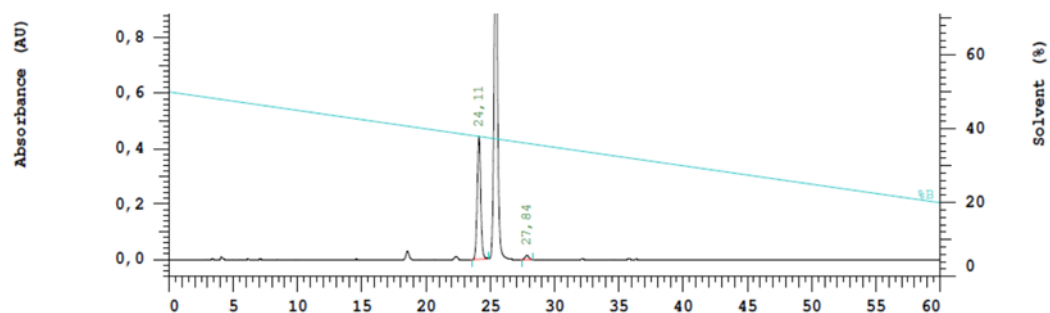

| No. | RT    | Area    | Conc 1 |
|-----|-------|---------|--------|
| 1   | 24,11 | 4205374 | 96,515 |
| 2   | 27,84 | 151862  | 3,485  |

### D-Valine (4)

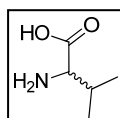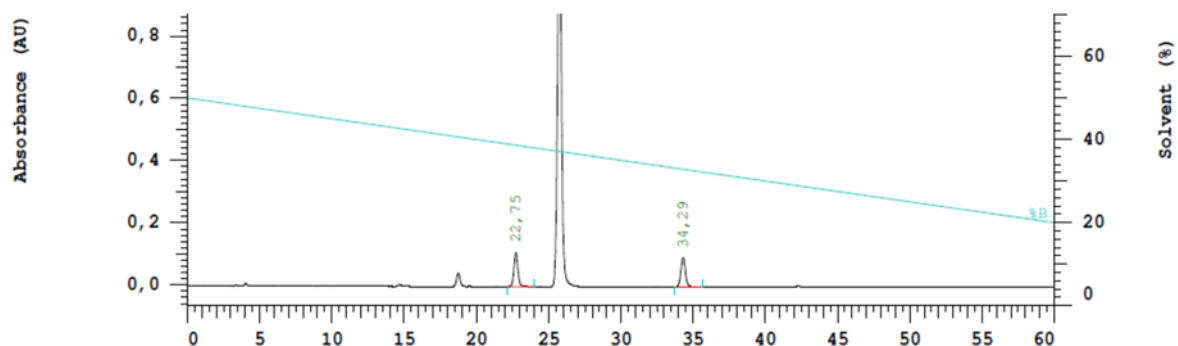

| Time (min) | %ACN | %0.1% | %Wasse | %Metha | Flow (ml/min) |
|------------|------|-------|--------|--------|---------------|
| 0,0        | 50,0 | 50,0  | 0,0    | 0,0    | 0,600         |
| 60,0       | 80,0 | 20,0  | 0,0    | 0,0    | 0,600         |

| No. | RT    | Area    | Conc 1 |
|-----|-------|---------|--------|
| 1   | 22,75 | 1047977 | 50,621 |
| 2   | 34,29 | 1022262 | 49,379 |

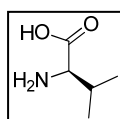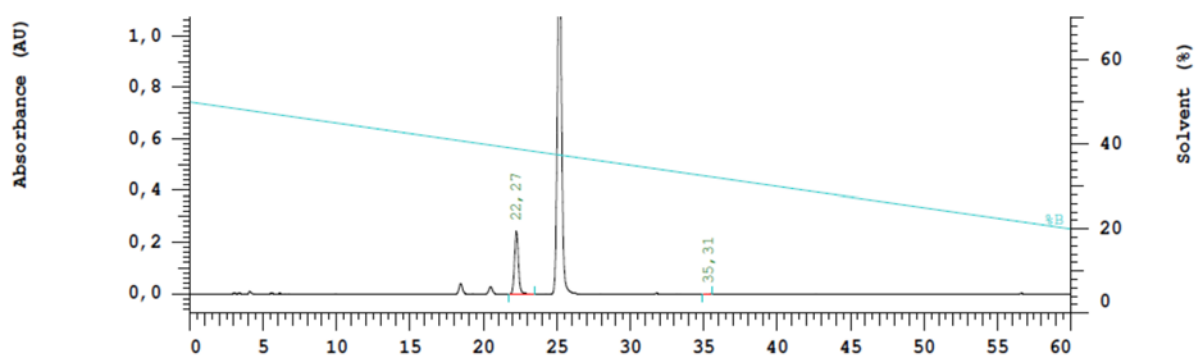

| No. | RT    | Area    | Conc 1 |
|-----|-------|---------|--------|
| 1   | 22,27 | 2237918 | 99,362 |
| 2   | 35,31 | 14363   | 0,638  |
